# Supplementary material for: Analytical solution for residual stress and strain preserved in anisotropic inclusion entrapped in an isotropic host
Source: Copernicus journal article supplement (doi:10.5194/se-12-817-2021), 2021-04-15
Supplement: Supplementary file 1 [file FE_random.xlsx]

## Sheet: Qtz
		Aspect ratio				Analytical stress				FEM	CT		FEM	VA
	X	Y	Z		sxx	syy	szz		sxx	syy	szz	sxx	syy	szz
1	0.34546	1.33343	0.30978		-0.904354	-1.16171	-0.833473		-0.9123	-1.17451	-0.802645	-0.898174	-1.14356	-0.83367
2	0.445001	1.34259	0.375745		-0.928482	-1.15067	-0.828597		-0.88239	-1.16731	-0.8052	-0.9256	-1.133	-0.825403
3	0.389465	0.507128	1.24996		-0.837497	-0.968855	-1.17409		-0.812662	-0.954257	-1.17218	-0.79286	-0.963171	-1.15546
4	0.572327	0.760422	1.33727		-0.861461	-0.992094	-1.13885		-0.842946	-0.960698	-1.12221	-0.843711	-0.984982	-1.12204
5	0.587736	1.15743	1.2996		-0.790289	-1.07162	-1.10487		-0.727623	-1.08334	-1.12443	-0.800906	-1.04164	-1.08297
6	0.562672	1.04327	0.431365		-0.975504	-1.11663	-0.839714		-0.937544	-1.14227	-0.805745	-0.956474	-1.09651	-0.835974
7	0.469297	0.629633	1.03774		-0.865214	-0.997932	-1.13077		-0.855002	-0.972295	-1.15479	-0.843665	-0.983284	-1.10921
8	1.09293	0.379623	0.342347		-1.14513	-0.919254	-0.853718		-1.14935	-0.886823	-0.834484	-1.13365	-0.904395	-0.827617
9	0.323248	0.2797	1.44181		-0.918405	-0.84121	-1.20731		-0.910052	-0.788685	-1.20167	-0.883669	-0.823551	-1.19226
10	0.363608	1.36028	0.288697		-0.931241	-1.16109	-0.794446		-0.901978	-1.18134	-0.76962	-0.930216	-1.14862	-0.774531
11	1.56365	0.384879	0.282152		-1.16267	-0.945419	-0.762747		-1.16882	-0.949754	-0.738507	-1.15254	-0.932296	-0.762356
12	1.26443	0.516333	1.18191		-1.09621	-0.748945	-1.09656		-1.12925	-0.684266	-1.11781	-1.06953	-0.767856	-1.07337
13	1.07667	0.280091	1.16329		-1.11629	-0.568105	-1.14755		-1.12814	-0.518117	-1.16342	-1.10405	-0.598672	-1.12738
14	0.218572	0.255823	1.08225		-0.839128	-0.923426	-1.2053		-0.814707	-0.913064	-1.22249	-0.825524	-0.886894	-1.19047
15	1.03477	1.16401	0.487214		-1.06515	-1.08711	-0.736065		-1.10568	-1.08261	-0.694861	-1.04003	-1.07707	-0.744256
16	0.945242	1.24588	0.519351		-1.04119	-1.09634	-0.766929		-1.06849	-1.10272	-0.718119	-1.02206	-1.08669	-0.772126
17	0.273052	0.232534	1.15514		-0.923783	-0.83852	-1.20535		-0.889583	-0.827096	-1.22157	-0.906783	-0.826253	-1.18969
18	1.20581	0.289495	1.01955		-1.12699	-0.583719	-1.12848		-1.13458	-0.535032	-1.145	-1.1106	-0.593418	-1.11407
19	0.696006	1.00041	1.23416		-0.878433	-1.02781	-1.09008		-0.841237	-1.02262	-1.11081	-0.874499	-1.00647	-1.07182
20	0.983064	1.19329	1.32067		-0.940682	-1.01421	-1.04925		-0.911182	-0.981672	-1.04794	-0.926148	-0.994621	-1.0259
21	0.38508	0.279432	1.14459		-0.970238	-0.806863	-1.19001		-0.922331	-0.806514	-1.17255	-0.958123	-0.794875	-1.17505
22	1.23721	0.712851	1.20729		-1.06389	-0.854587	-1.06573		-1.07314	-0.844825	-1.086	-1.0472	-0.840461	-1.05471
23	1.26688	0.319929	1.11773		-1.12399	-0.593098	-1.12962		-1.1308	-0.535457	-1.14819	-1.10263	-0.609162	-1.10755
24	1.19161	0.356948	0.326413		-1.15292	-0.908428	-0.848257		-1.16412	-0.893936	-0.846887	-1.14329	-0.903029	-0.834418
25	1.26119	1.12009	1.36213		-1.0068	-0.963253	-1.03446		-0.998045	-0.962809	-1.04109	-0.99543	-0.957716	-1.01707
26	1.25803	0.84907	1.42133		-1.03694	-0.881633	-1.07663		-1.02596	-0.851122	-1.08978	-1.01675	-0.879885	-1.05295
27	0.315279	0.385791	1.27357		-0.837601	-0.942651	-1.19337		-0.811309	-0.912545	-1.19824	-0.824133	-0.936163	-1.16779
28	1.41773	0.609176	0.498357		-1.13323	-0.950269	-0.838767		-1.1646	-0.950178	-0.807894	-1.11174	-0.942117	-0.844196
29	1.31303	0.993302	0.728014		-1.07836	-1.00805	-0.867309		-1.10377	-0.950422	-0.850714	-1.05958	-1.00632	-0.849773
30	0.376079	0.262153	1.03193		-0.980959	-0.799256	-1.18582		-0.919628	-0.797526	-1.18958	-0.971379	-0.770235	-1.16266
31	0.37218	1.01261	0.30476		-0.939913	-1.14513	-0.825926		-0.911291	-1.14665	-0.811616	-0.933035	-1.13079	-0.807603
32	0.370044	0.318303	0.952996		-0.943999	-0.86958	-1.17317		-0.889909	-0.853771	-1.16871	-0.919715	-0.827843	-1.16661
33	0.245448	0.265401	1.01722		-0.867536	-0.908833	-1.19873		-0.845227	-0.878555	-1.20829	-0.815177	-0.881337	-1.18801
34	0.350534	1.27445	0.279123		-0.931752	-1.15997	-0.797024		-0.946306	-1.17143	-0.758476	-0.919461	-1.14677	-0.802476
35	0.40146	1.1435	0.317791		-0.943853	-1.1484	-0.810945		-0.882181	-1.14911	-0.803833	-0.933536	-1.13494	-0.791888
36	0.653692	1.03891	0.792159		-0.918101	-1.07219	-0.996014		-0.874774	-1.07257	-0.953192	-0.905396	-1.04485	-0.988167
37	1.25912	0.910839	1.53247		-1.023	-0.892445	-1.08353		-1.02221	-0.89558	-1.09983	-1.00938	-0.872492	-1.07335
38	1.39533	0.440471	0.524389		-1.14427	-0.854433	-0.932649		-1.16246	-0.798115	-0.907531	-1.12736	-0.838969	-0.921315
39	0.987742	0.282216	1.09101		-1.11152	-0.596707	-1.1449		-1.10165	-0.543395	-1.1635	-1.09489	-0.583678	-1.12621
40	1.30113	1.12774	0.808514		-1.05937	-1.02196	-0.879946		-1.0372	-0.999011	-0.86881	-1.04108	-1.01273	-0.863759
41	1.11282	0.513959	0.727537		-1.10437	-0.854829	-1.00706		-1.12126	-0.850739	-0.97555	-1.08225	-0.818333	-1.02128
42	1.08677	0.607285	0.559292		-1.10368	-0.949927	-0.903804		-1.13146	-0.906222	-0.8631	-1.08253	-0.952107	-0.882968
43	0.602414	1.1175	0.344414		-1.01727	-1.12694	-0.736098		-0.980834	-1.13085	-0.714817	-1.01723	-1.09979	-0.710654
44	0.767748	1.38111	0.696902		-0.951157	-1.1058	-0.898658		-0.951255	-1.11814	-0.867591	-0.935459	-1.09391	-0.89451
45	0.764805	1.19368	1.07135		-0.898432	-1.05956	-1.03373		-0.864906	-1.05133	-1.02732	-0.871315	-1.04316	-1.03054
46	0.250168	1.18985	0.197229		-0.924823	-1.1687	-0.780672		-0.898298	-1.17478	-0.785415	-0.916011	-1.15864	-0.772468
47	1.34308	0.406519	0.459741		-1.14812	-0.86298	-0.915049		-1.16629	-0.825389	-0.896633	-1.13477	-0.858538	-0.90047
48	0.295265	0.33551	1.26963		-0.853274	-0.920745	-1.19926		-0.837829	-0.908738	-1.23185	-0.850715	-0.906884	-1.18652
49	1.05679	1.22702	1.24663		-0.962614	-1.0163	-1.02364		-0.946794	-1.01613	-1.02661	-0.951703	-1.00507	-1.00814
50	0.721171	0.988326	1.31499		-0.883369	-1.01595	-1.09893		-0.84266	-1.02151	-1.12523	-0.881462	-0.995318	-1.07329
51	1.34388	1.08616	0.805409		-1.06773	-1.01216	-0.880673		-1.07168	-1.02584	-0.848875	-1.04803	-0.990566	-0.877497
52	0.168473	1.07726	1.16051		-0.39866	-1.15562	-1.16503		-0.35868	-1.15114	-1.1853	-0.41464	-1.14689	-1.14995
53	0.783663	1.17811	1.23825		-0.886556	-1.04458	-1.06374		-0.891457	-1.06484	-1.08471	-0.869604	-1.02863	-1.05204
54	1.26578	0.509376	0.399647		-1.139	-0.953718	-0.818817		-1.15757	-0.91638	-0.796813	-1.11861	-0.946127	-0.80971
55	0.558964	0.411623	1.04563		-0.991094	-0.84904	-1.14797		-0.946434	-0.825874	-1.15543	-0.982989	-0.828118	-1.12825
56	0.606905	0.57519	1.24156		-0.940648	-0.915755	-1.14325		-0.930866	-0.904165	-1.19516	-0.935472	-0.907257	-1.12074
57	0.968066	1.31608	0.397829		-1.06707	-1.11319	-0.655839		-1.08611	-1.13471	-0.594284	-1.04861	-1.10191	-0.677061
58	1.25052	0.603309	1.18701		-1.08209	-0.802203	-1.08124		-1.10055	-0.75164	-1.09661	-1.05778	-0.81189	-1.05915
59	0.336763	0.281561	1.2188		-0.933576	-0.840133	-1.19809		-0.904894	-0.82652	-1.20807	-0.922935	-0.832195	-1.18204
60	1.20961	0.927563	1.43139		-1.01763	-0.912853	-1.07175		-1.00175	-0.906465	-1.07266	-0.998577	-0.901419	-1.05605
61	1.24336	0.44867	0.27363		-1.14936	-0.990713	-0.721464		-1.1546	-0.931646	-0.720502	-1.13899	-0.982187	-0.719628
62	0.69179	1.20281	0.409081		-1.01636	-1.12059	-0.755915		-0.992107	-1.11941	-0.747445	-1.00143	-1.10586	-0.751802
63	1.21539	0.606121	0.31614		-1.13435	-1.02554	-0.694141		-1.13683	-1.01644	-0.687527	-1.12683	-1.01259	-0.685936
64	1.01567	0.220484	0.269804		-1.16213	-0.825072	-0.920749		-1.16309	-0.83434	-0.896745	-1.14724	-0.807075	-0.910429
65	1.2046	1.30476	0.855717		-1.02834	-1.04961	-0.88668		-1.014	-1.02513	-0.866024	-1.0105	-1.04132	-0.875907
66	0.276881	1.13524	0.257322		-0.893874	-1.16388	-0.842054		-0.855279	-1.18689	-0.836584	-0.887049	-1.1503	-0.837291
67	1.17524	0.292635	0.349146		-1.15697	-0.838619	-0.919823		-1.17453	-0.806331	-0.882852	-1.14068	-0.829005	-0.914974
68	0.771404	0.270544	1.19772		-1.08795	-0.619433	-1.16508		-1.0762	-0.60482	-1.18248	-1.06143	-0.611233	-1.16367
69	0.734375	1.30725	1.20374		-0.854541	-1.07162	-1.0569		-0.835647	-1.08991	-1.03065	-0.849018	-1.05261	-1.04442
70	0.308095	1.41021	0.251743		-0.918319	-1.16773	-0.794376		-0.920948	-1.16674	-0.772452	-0.90551	-1.15205	-0.795076
71	0.455329	0.377169	0.969025		-0.962756	-0.873255	-1.15601		-0.961479	-0.824602	-1.14525	-0.925192	-0.847051	-1.14556
72	0.73423	0.91058	1.25724		-0.908482	-0.998787	-1.096		-0.899307	-0.981477	-1.09793	-0.888825	-0.987623	-1.08289
73	1.1282	0.656618	0.548859		-1.10396	-0.968539	-0.877231		-1.12619	-0.935282	-0.863298	-1.0885	-0.963143	-0.860861
74	0.52975	1.25334	0.6311		-0.876968	-1.12361	-0.95413		-0.837968	-1.13875	-0.92545	-0.857611	-1.10328	-0.960131
75	1.05043	0.830983	0.657456		-1.06607	-1.00247	-0.89873		-1.03785	-1.03742	-0.866787	-1.02111	-1.00714	-0.858959
76	1.22442	0.257369	0.330568		-1.16251	-0.811225	-0.932994		-1.17469	-0.780892	-0.875459	-1.14585	-0.79769	-0.933721
77	1.33061	0.990689	0.445029		-1.1084	-1.05991	-0.690391		-1.14219	-1.06371	-0.650264	-1.09807	-1.04934	-0.682389
78	0.241171	0.207378	1.08127		-0.919661	-0.839101	-1.20764		-0.907363	-0.813329	-1.2033	-0.891055	-0.812293	-1.19533
79	1.21408	0.888521	1.02021		-1.05007	-0.94527	-0.998191		-1.03941	-0.922949	-0.971344	-1.03219	-0.921841	-0.985931
80	1.11496	1.33279	1.14713		-0.975597	-1.0345	-0.984659		-0.928075	-0.978814	-0.953381	-0.959068	-1.01303	-0.966067
81	0.330166	0.312564	1.33181		-0.90108	-0.872278	-1.20082		-0.88119	-0.843228	-1.21251	-0.892498	-0.864661	-1.18199
82	0.30224	1.15472	0.18669		-0.97774	-1.16188	-0.705663		-0.974801	-1.16393	-0.675883	-0.963789	-1.1535	-0.676062
83	0.464099	0.247424	1.12566		-1.0287	-0.719028	-1.18471		-0.985279	-0.711342	-1.1791	-1.00557	-0.705761	-1.16528
84	0.219425	0.260219	1.19434		-0.831776	-0.923853	-1.20888		-0.812228	-0.899592	-1.22983	-0.806868	-0.904614	-1.19157
85	0.318082	1.26794	0.930998		-0.621664	-1.14231	-1.10843		-0.581022	-1.14814	-1.09736	-0.619874	-1.12663	-1.09053
86	0.943086	0.775523	1.15506		-1.0056	-0.928199	-1.07109		-0.988264	-0.932196	-1.05922	-0.971282	-0.912631	-1.05269
87	0.449523	1.19863	1.02952		-0.731827	-1.11159	-1.09169		-0.669369	-1.12092	-1.11901	-0.747775	-1.0805	-1.07616
88	1.17142	1.04613	0.22159		-1.12051	-1.11109	-0.453135		-1.1335	-1.12121	-0.40412	-1.11407	-1.09641	-0.473907
89	0.419665	1.28008	1.12817		-0.679726	-1.1208	-1.10904		-0.664209	-1.13695	-1.10596	-0.680698	-1.10882	-1.09893
90	1.05239	0.512978	0.833592		-1.0907	-0.836669	-1.04356		-1.12082	-0.778847	-1.00317	-1.06355	-0.818921	-1.03665
91	1.2403	0.320397	0.387612		-1.15499	-0.837448	-0.925678		-1.16449	-0.807881	-0.87702	-1.13602	-0.812628	-0.922667
92	1.14101	0.376759	0.41389		-1.14353	-0.875197	-0.912039		-1.17012	-0.85663	-0.884075	-1.12699	-0.872313	-0.9016
93	1.10463	1.27923	0.697037		-1.03543	-1.07021	-0.836129		-1.02402	-1.08722	-0.809633	-1.01997	-1.05652	-0.829242
94	0.286494	0.242761	1.28581		-0.923004	-0.834571	-1.20792		-0.907577	-0.835507	-1.22867	-0.911062	-0.815703	-1.19845
95	0.305265	0.229564	1.1226		-0.95531	-0.806126	-1.20114		-0.937548	-0.772332	-1.20985	-0.953889	-0.77731	-1.1713
96	0.116683	1.27542	0.933243		-0.310066	-1.17304	-1.15955		-0.25329	-1.17594	-1.1701	-0.34379	-1.16451	-1.14648
97	0.774624	0.707153	1.13913		-0.974597	-0.936443	-1.0957		-0.976638	-0.953073	-1.07731	-0.945187	-0.910705	-1.07001
98	1.29754	0.573866	0.747972		-1.11303	-0.865617	-0.982398		-1.12691	-0.848472	-0.981113	-1.08978	-0.849204	-0.978085
99	0.274583	1.15128	0.258609		-0.889936	-1.16465	-0.84527		-0.86665	-1.18659	-0.797989	-0.88342	-1.15028	-0.835218
100	1.18497	0.290748	0.269251		-1.16126	-0.896618	-0.841217		-1.17654	-0.858642	-0.819024	-1.14921	-0.885701	-0.839683
101	1.16817	0.706044	0.591473		-1.09944	-0.971305	-0.882365		-1.12375	-0.938927	-0.862992	-1.08127	-0.96398	-0.874286
102	1.19098	0.711835	0.807883		-1.08319	-0.923033	-0.972978		-1.07065	-0.885035	-0.94876	-1.05814	-0.91141	-0.96218
103	1.14151	0.336122	0.427144		-1.14684	-0.834577	-0.946779		-1.15576	-0.84241	-0.872855	-1.13068	-0.806569	-0.946566
104	0.387553	1.00705	0.353527		-0.922069	-1.13977	-0.86532		-0.92379	-1.1344	-0.857095	-0.91546	-1.11525	-0.859773
105	0.512779	0.372105	1.34598		-0.975585	-0.815404	-1.18132		-0.93185	-0.808086	-1.17181	-0.97356	-0.766791	-1.1645
106	1.21423	1.16652	0.728987		-1.05436	-1.04452	-0.850159		-1.07665	-1.04929	-0.809283	-1.04025	-1.0291	-0.847031
107	0.594986	1.3591	0.525532		-0.936939	-1.1306	-0.865885		-0.924734	-1.14346	-0.84235	-0.93056	-1.11464	-0.849843
108	1.1547	1.24794	0.327284		-1.10046	-1.10941	-0.557574		-1.12487	-1.14007	-0.479691	-1.09021	-1.09309	-0.584586
109	1.33242	0.359045	0.420651		-1.15358	-0.847578	-0.918664		-1.16949	-0.794272	-0.895725	-1.13322	-0.838596	-0.907302
110	0.627189	0.582453	1.43674		-0.936271	-0.900846	-1.15782		-0.92862	-0.874907	-1.17061	-0.938524	-0.861848	-1.13992
111	0.296329	1.10085	1.3524		-0.554307	-1.12561	-1.15728		-0.473391	-1.14253	-1.16655	-0.585682	-1.09564	-1.14308
112	1.33881	0.377721	0.756609		-1.1356	-0.724847	-1.05182		-1.16171	-0.707484	-1.0117	-1.12637	-0.708671	-1.03293
113	1.16711	0.908186	0.738161		-1.06659	-0.997625	-0.905064		-1.06354	-0.977111	-0.889057	-1.04079	-0.993612	-0.89353
114	0.709515	1.31448	0.267664		-1.06272	-1.13565	-0.585201		-1.05194	-1.15564	-0.534643	-1.03863	-1.12406	-0.595198
115	1.19977	0.637881	0.781922		-1.09454	-0.897055	-0.982339		-1.1304	-0.845031	-0.943254	-1.07198	-0.875967	-0.980097
116	1.25904	1.03463	1.19403		-1.02779	-0.959253	-1.01276		-1.01454	-0.95911	-0.994168	-1.02058	-0.944312	-0.992456
117	0.471312	1.15192	0.393613		-0.942597	-1.13746	-0.841354		-0.899515	-1.16297	-0.82151	-0.92545	-1.12167	-0.823752
118	1.04602	1.29474	0.866955		-0.998604	-1.05912	-0.916442		-0.980426	-1.0822	-0.922574	-0.987384	-1.0495	-0.893892
119	1.05497	1.31615	0.402513		-1.07673	-1.10891	-0.641658		-1.1222	-1.10733	-0.595197	-1.05385	-1.10209	-0.642405
120	0.389541	0.447767	1.13288		-0.874026	-0.943014	-1.17106		-0.846614	-0.911305	-1.1962	-0.856588	-0.937832	-1.14858
121	0.417586	1.37217	0.474157		-0.86039	-1.15076	-0.916531		-0.81568	-1.18251	-0.875563	-0.854547	-1.12396	-0.910582
122	0.178733	0.284478	1.22315		-0.738524	-0.988411	-1.20956		-0.740318	-0.956361	-1.2111	-0.710808	-0.987282	-1.19499
123	0.306802	1.258	0.851287		-0.629209	-1.14569	-1.09989		-0.569752	-1.15166	-1.1118	-0.649895	-1.13036	-1.07362
124	1.09677	0.904328	0.243492		-1.11897	-1.09905	-0.521271		-1.12499	-1.1315	-0.452727	-1.10695	-1.07976	-0.505236
125	0.341756	0.399664	1.00854		-0.869006	-0.946624	-1.17159		-0.848252	-0.924265	-1.195	-0.846951	-0.943364	-1.15538
126	1.43875	0.522039	0.386576		-1.14645	-0.958569	-0.790495		-1.17708	-0.956996	-0.770544	-1.12601	-0.958273	-0.791659
127	0.373895	0.968892	1.13673		-0.688014	-1.09773	-1.1335		-0.629468	-1.1072	-1.16142	-0.699225	-1.07921	-1.10988
128	1.00564	1.11308	1.24598		-0.96342	-1.0013	-1.04074		-0.95444	-0.971864	-1.05112	-0.95277	-0.980655	-1.02581
129	0.336043	0.411248	1.24326		-0.842795	-0.946546	-1.18767		-0.820315	-0.930893	-1.21023	-0.833113	-0.936896	-1.17245
130	0.257202	1.36806	0.43216		-0.730189	-1.16906	-0.996824		-0.705709	-1.18202	-0.964613	-0.705257	-1.14773	-0.99985
131	1.10712	0.552327	0.463804		-1.11973	-0.955941	-0.861921		-1.13584	-0.955575	-0.845446	-1.10466	-0.95004	-0.8503
132	0.745951	1.36548	0.652463		-0.955665	-1.10954	-0.884882		-0.905057	-1.15084	-0.865599	-0.942723	-1.09125	-0.87943
133	0.306479	1.25979	0.386912		-0.820863	-1.16127	-0.934653		-0.780984	-1.18053	-0.907144	-0.807006	-1.13926	-0.933423
134	0.991589	1.18297	0.164406		-1.11647	-1.12723	-0.3702		-1.1284	-1.14116	-0.308523	-1.09691	-1.12019	-0.40293
135	0.25901	0.166948	1.20899		-0.979404	-0.745529	-1.21193		-0.941302	-0.738781	-1.20744	-0.975	-0.72307	-1.19685
136	0.513101	1.09512	1.18133		-0.769182	-1.08208	-1.10609		-0.716622	-1.07557	-1.12324	-0.776207	-1.05723	-1.08452
137	1.17352	0.786381	0.74714		-1.07811	-0.962213	-0.934288		-1.0848	-0.929484	-0.905979	-1.07038	-0.925829	-0.905883
138	1.19877	0.291578	0.326025		-1.15912	-0.852874	-0.899608		-1.17584	-0.826364	-0.886257	-1.13885	-0.84842	-0.888546
139	1.29751	0.535846	0.434053		-1.1364	-0.949581	-0.8319		-1.16129	-0.938712	-0.821594	-1.11834	-0.9463	-0.826331
140	1.22537	0.965802	0.486594		-1.09689	-1.05221	-0.74124		-1.08926	-1.0391	-0.708103	-1.07777	-1.03738	-0.701426
141	1.05666	0.864251	0.271281		-1.11479	-1.09052	-0.573957		-1.13027	-1.07218	-0.547863	-1.09845	-1.08074	-0.57264
142	0.317804	1.16985	0.29446		-0.899319	-1.15947	-0.846735		-0.885142	-1.1839	-0.822573	-0.893492	-1.1542	-0.830294
143	1.18759	0.301499	0.192606		-1.16193	-0.97179	-0.716001		-1.1838	-0.966744	-0.698559	-1.14847	-0.965599	-0.712061
144	0.331283	1.20698	0.197219		-0.985244	-1.16038	-0.695071		-0.945283	-1.14641	-0.697652	-0.974764	-1.15349	-0.669028
145	0.339499	0.269608	1.16518		-0.946586	-0.826958	-1.19637		-0.902402	-0.811699	-1.19732	-0.946292	-0.803592	-1.17286
146	0.517345	1.31793	0.394147		-0.956684	-1.14234	-0.806645		-0.922465	-1.17011	-0.768967	-0.955151	-1.12575	-0.789679
147	0.266203	0.375141	1.27323		-0.79072	-0.970818	-1.19821		-0.792919	-0.941728	-1.20571	-0.760741	-0.958372	-1.18331
148	1.09815	0.490429	0.330486		-1.1357	-0.984581	-0.775307		-1.14085	-0.966382	-0.771781	-1.11918	-0.984386	-0.731551
149	0.609868	0.544447	1.1974		-0.954746	-0.90232	-1.14185		-0.927686	-0.870934	-1.15077	-0.94677	-0.885061	-1.11834
150	1.02357	0.153656	0.289205		-1.16556	-0.690186	-1.01488		-1.16784	-0.679874	-1.01644	-1.15144	-0.696175	-0.999293
151	1.01811	1.14356	1.3199		-0.956182	-1.00035	-1.04945		-0.951513	-0.979507	-1.04595	-0.940385	-0.978851	-1.03734
152	0.357824	1.19335	0.392873		-0.866979	-1.15225	-0.905624		-0.858611	-1.16291	-0.885233	-0.861222	-1.13856	-0.898988
153	1.18156	0.235157	0.979272		-1.13192	-0.524169	-1.13798		-1.14969	-0.449185	-1.16166	-1.1114	-0.548475	-1.11007
154	1.14789	1.23624	0.852107		-1.02417	-1.04461	-0.901853		-1.0382	-1.02546	-0.907533	-1.00121	-1.0351	-0.88793
155	1.02083	0.415262	0.308661		-1.13956	-0.963685	-0.801143		-1.14843	-0.91962	-0.799261	-1.11653	-0.981279	-0.760607
156	0.171767	0.270349	1.20008		-0.740986	-0.98554	-1.21053		-0.713907	-0.940232	-1.21906	-0.687259	-0.962697	-1.1956
157	1.17421	0.465197	0.547494		-1.12773	-0.875082	-0.945498		-1.15637	-0.847476	-0.927352	-1.10402	-0.869816	-0.942514
158	1.15075	1.05138	0.807299		-1.0444	-1.01906	-0.910176		-1.02316	-1.02324	-0.882872	-1.02154	-1.00686	-0.9011
159	1.03416	0.861109	1.36797		-0.997395	-0.922715	-1.08495		-0.988788	-0.922384	-1.09825	-0.98552	-0.915351	-1.07031
160	1.20102	1.14737	0.785129		-1.04709	-1.0351	-0.879786		-1.03697	-1.03507	-0.851064	-1.02894	-1.02606	-0.859534
161	0.824824	1.04888	1.29132		-0.914821	-1.01149	-1.07694		-0.915326	-1.00315	-1.0697	-0.896532	-0.995916	-1.06519
162	1.27224	0.277073	0.369383		-1.1605	-0.803629	-0.94467		-1.17601	-0.779888	-0.886275	-1.14327	-0.784482	-0.947178
163	0.787166	1.01971	1.25766		-0.90929	-1.01387	-1.07926		-0.908479	-0.991381	-1.07072	-0.898963	-0.996338	-1.0614
164	1.25133	1.36701	0.567968		-1.06981	-1.08597	-0.727646		-1.11148	-1.1169	-0.646486	-1.04535	-1.07023	-0.749463
165	0.474869	0.424538	1.22931		-0.935962	-0.880693	-1.17192		-0.895739	-0.875801	-1.19263	-0.918804	-0.873594	-1.15017
166	0.449711	0.700999	0.943506		-0.841771	-1.03296	-1.11258		-0.816375	-0.995651	-1.12318	-0.803394	-0.999784	-1.07959
167	0.567531	1.04364	0.731281		-0.890037	-1.09022	-0.997613		-0.85714	-1.10223	-0.993555	-0.883111	-1.07044	-0.983664
168	1.0504	0.364207	1.16031		-1.10067	-0.663973	-1.13344		-1.10695	-0.650941	-1.12359	-1.07155	-0.661461	-1.1258
169	0.990575	1.09692	0.715276		-1.02468	-1.05195	-0.888594		-0.997939	-1.0393	-0.866794	-1.01741	-1.03357	-0.860441
170	1.17374	0.574117	0.701979		-1.10487	-0.888313	-0.973944		-1.13267	-0.850686	-0.940336	-1.08781	-0.869994	-0.969871
171	0.308609	1.34041	0.265604		-0.908754	-1.16613	-0.814091		-0.871011	-1.18355	-0.788647	-0.903376	-1.15294	-0.806756
172	0.248337	1.19981	0.251404		-0.867372	-1.16925	-0.861951		-0.872285	-1.17038	-0.833641	-0.865696	-1.15154	-0.824899
173	1.05825	1.16741	0.727249		-1.03028	-1.05562	-0.87284		-0.981525	-1.05867	-0.868269	-1.02169	-1.02959	-0.857934
174	1.3054	0.318846	0.415275		-1.15609	-0.816181	-0.94353		-1.16542	-0.789209	-0.907224	-1.13497	-0.799828	-0.943611
175	0.299992	0.215649	1.19192		-0.96203	-0.787927	-1.20534		-0.94245	-0.764425	-1.2112	-0.943664	-0.764199	-1.19055
176	1.06721	1.31163	0.472839		-1.06553	-1.10046	-0.699082		-1.10911	-1.12382	-0.617968	-1.03655	-1.08603	-0.718181
177	0.507515	1.21152	0.445549		-0.934989	-1.13436	-0.859951		-0.908086	-1.17247	-0.832276	-0.936665	-1.10739	-0.832764
178	1.29359	0.456464	0.428322		-1.14324	-0.912291	-0.867752		-1.16059	-0.877365	-0.834456	-1.1231	-0.90608	-0.867971
179	0.973551	1.19014	0.446034		-1.06293	-1.09813	-0.712268		-1.05117	-1.12743	-0.66592	-1.0417	-1.07958	-0.715479
180	1.15283	0.474583	1.33852		-1.08608	-0.715792	-1.12738		-1.06597	-0.692728	-1.15801	-1.0677	-0.719369	-1.11162
181	0.375006	1.29684	0.457632		-0.8403	-1.15253	-0.934313		-0.799372	-1.15799	-0.91104	-0.821199	-1.13046	-0.928193
182	0.670722	1.22933	0.827421		-0.897887	-1.09215	-0.986504		-0.863244	-1.05345	-0.962118	-0.872415	-1.08055	-0.973331
183	1.34494	0.510218	0.598502		-1.13148	-0.872022	-0.941211		-1.15412	-0.861697	-0.932771	-1.11091	-0.867795	-0.937458
184	1.36111	0.940303	0.35481		-1.12089	-1.07147	-0.615657		-1.13808	-1.07824	-0.554028	-1.11684	-1.04877	-0.630034
185	0.652448	0.764576	1.20922		-0.90999	-0.979251	-1.114		-0.892793	-0.984416	-1.13315	-0.880877	-0.982826	-1.09117
186	0.93421	1.38308	0.523182		-1.03213	-1.10783	-0.757063		-1.05038	-1.14044	-0.700751	-1.01677	-1.09233	-0.771496
187	0.485501	1.06462	0.345132		-0.976684	-1.13356	-0.796142		-0.952681	-1.13956	-0.786094	-0.976553	-1.11783	-0.757905
188	1.08993	1.1857	1.01807		-0.997811	-1.02479	-0.970034		-0.971817	-1.0394	-0.964241	-0.982124	-1.00448	-0.958838
189	0.757103	0.608356	1.12415		-0.993321	-0.89959	-1.10883		-0.94819	-0.877078	-1.11627	-0.982377	-0.884664	-1.08605
190	1.24025	0.562954	0.740546		-1.10981	-0.866658	-0.986972		-1.12341	-0.840843	-0.975371	-1.09462	-0.858699	-0.9739
191	1.12096	1.24446	0.535123		-1.06474	-1.0846	-0.743365		-1.10251	-1.11521	-0.663111	-1.04199	-1.06549	-0.769793
192	0.557071	0.422601	1.3361		-0.971878	-0.836349	-1.17219		-0.920488	-0.8057	-1.19627	-0.951742	-0.802401	-1.14262
193	1.02835	0.223636	0.334308		-1.15821	-0.774164	-0.974458		-1.15788	-0.7435	-0.965812	-1.14626	-0.737154	-0.961706
194	1.03679	1.33652	0.875436		-0.992377	-1.06431	-0.916689		-0.98564	-1.07007	-0.900969	-0.969802	-1.04287	-0.918044
195	0.337765	1.14046	1.26563		-0.603251	-1.12138	-1.14392		-0.512418	-1.13201	-1.16613	-0.632222	-1.09603	-1.12661
196	0.433003	0.395114	1.41921		-0.918816	-0.871821	-1.18965		-0.888013	-0.849625	-1.21649	-0.916762	-0.864101	-1.16675
197	0.876078	1.25002	1.12874		-0.923168	-1.04957	-1.02269		-0.890053	-1.0127	-0.99775	-0.913287	-1.02863	-1.00109
198	1.13039	0.568238	0.505271		-1.11665	-0.946953	-0.881416		-1.13147	-0.908947	-0.86586	-1.09759	-0.944588	-0.865514
199	1.25486	0.394998	0.363413		-1.15029	-0.90974	-0.853413		-1.17858	-0.907719	-0.834437	-1.1222	-0.904899	-0.853615
200	0.747406	0.895456	1.24055		-0.917968	-0.993408	-1.09332		-0.889659	-0.97203	-1.09923	-0.899204	-0.98239	-1.06661
201	1.19106	0.950613	0.340164		-1.11187	-1.08116	-0.617511		-1.14123	-1.09165	-0.547914	-1.09591	-1.06329	-0.641743
202	1.12969	0.992923	0.738588		-1.05395	-1.01908	-0.894137		-1.0708	-1.00686	-0.874184	-1.04457	-1.00605	-0.866584
203	1.26238	0.420977	0.161414		-1.15304	-1.04889	-0.550375		-1.16285	-1.0378	-0.542699	-1.14342	-1.04118	-0.52203
204	1.13833	1.28544	0.686216		-1.04199	-1.07002	-0.824266		-1.08037	-1.03979	-0.775287	-1.03142	-1.04986	-0.794118
205	0.70222	1.21726	0.726189		-0.933485	-1.09439	-0.94262		-0.914727	-1.11439	-0.911917	-0.922933	-1.07435	-0.927467
206	1.31728	0.763928	0.655562		-1.10302	-0.964219	-0.88538		-1.11717	-0.965992	-0.857836	-1.08271	-0.955097	-0.881239
207	0.496703	0.460081	1.01984		-0.944641	-0.908985	-1.14518		-0.93439	-0.878395	-1.17156	-0.918918	-0.886577	-1.13038
208	0.287869	1.25049	0.152854		-0.999597	-1.16407	-0.645826		-0.974447	-1.17352	-0.623419	-0.992518	-1.14682	-0.603247
209	0.298306	1.14841	0.35181		-0.841415	-1.15895	-0.918587		-0.840887	-1.18202	-0.906522	-0.843844	-1.14448	-0.910025
210	0.338017	1.13712	1.37165		-0.591499	-1.1189	-1.15149		-0.561037	-1.10061	-1.15796	-0.579512	-1.1064	-1.14164
211	1.37066	0.327332	0.872433		-1.13665	-0.64063	-1.09295		-1.14356	-0.586611	-1.1182	-1.12063	-0.647092	-1.07035
212	1.2316	0.462752	0.487922		-1.13571	-0.893045	-0.908983		-1.15229	-0.863242	-0.902074	-1.11563	-0.877926	-0.913414
213	0.894876	0.713232	1.2509		-0.999206	-0.904003	-1.09927		-0.994156	-0.891365	-1.11015	-0.984286	-0.879612	-1.08488
214	0.880555	0.493905	1.17114		-1.04879	-0.800989	-1.12198		-1.01618	-0.780255	-1.10758	-1.02333	-0.776681	-1.10602
215	0.74448	1.03926	1.27705		-0.887773	-1.02421	-1.08637		-0.851433	-1.02472	-1.10214	-0.884454	-1.00006	-1.06769
216	0.296747	1.17013	0.255666		-0.912121	-1.16275	-0.819153		-0.868894	-1.16631	-0.805546	-0.90721	-1.14923	-0.805385
217	0.279284	0.324775	1.28514		-0.844106	-0.924288	-1.20206		-0.829701	-0.888391	-1.22116	-0.821343	-0.920502	-1.18352
218	1.25604	0.565671	0.653583		-1.11645	-0.890447	-0.950842		-1.14399	-0.897514	-0.941467	-1.09837	-0.884163	-0.942233
219	1.1266	1.30604	0.289575		-1.10265	-1.11748	-0.512213		-1.11498	-1.13596	-0.452716	-1.08709	-1.11192	-0.52718
220	0.571165	0.750631	1.16286		-0.878322	-0.998928	-1.12013		-0.856779	-1.00211	-1.12217	-0.828807	-1.00503	-1.08527
221	1.4423	0.614445	0.833379		-1.11517	-0.85388	-0.989762		-1.13824	-0.823989	-0.95753	-1.09916	-0.84314	-0.984294
222	0.300483	1.32699	0.256122		-0.910296	-1.16667	-0.810119		-0.899903	-1.1711	-0.772671	-0.900944	-1.14697	-0.808143
223	0.306525	1.40494	0.317498		-0.863969	-1.16742	-0.871265		-0.842297	-1.17957	-0.829926	-0.852767	-1.15259	-0.864544
224	0.396954	1.13041	0.503726		-0.846752	-1.13811	-0.957655		-0.833158	-1.14036	-0.951385	-0.823217	-1.12535	-0.941549
225	1.25666	1.11861	0.470482		-1.09388	-1.0743	-0.694762		-1.11915	-1.10071	-0.63359	-1.08346	-1.0602	-0.71074
226	0.292491	0.246594	1.14396		-0.928799	-0.838918	-1.20191		-0.930831	-0.791061	-1.21636	-0.913156	-0.828223	-1.18643
227	0.432239	0.230429	1.17114		-1.02514	-0.710565	-1.19128		-0.9987	-0.705737	-1.21534	-1.0055	-0.691478	-1.17572
228	1.1544	0.302999	0.274384		-1.15892	-0.904337	-0.837404		-1.16336	-0.895409	-0.82195	-1.14866	-0.888996	-0.81551
229	0.471966	0.52947	1.20897		-0.889076	-0.944596	-1.15968		-0.868769	-0.921557	-1.19153	-0.866188	-0.923037	-1.14639
230	0.493035	1.18437	1.08254		-0.756596	-1.10051	-1.09091		-0.735393	-1.0944	-1.0611	-0.751345	-1.07669	-1.0764
231	1.19499	0.543995	0.698061		-1.11064	-0.871672	-0.980672		-1.12531	-0.820335	-0.946748	-1.09429	-0.843589	-0.969058
232	1.14684	1.26763	0.538467		-1.06638	-1.08517	-0.738039		-1.0913	-1.12067	-0.67636	-1.05114	-1.06242	-0.75449
233	1.24824	1.26162	0.833106		-1.04049	-1.04326	-0.877232		-1.01357	-1.01719	-0.861672	-1.02028	-1.03018	-0.86349
234	0.702431	1.19804	0.807434		-0.918034	-1.0861	-0.974512		-0.893617	-1.09683	-0.971803	-0.896079	-1.07705	-0.954027
235	0.744446	1.03927	1.27706		-0.887758	-1.02422	-1.08637		-0.851382	-1.02463	-1.10227	-0.884375	-1.00001	-1.06781
236	0.657573	0.494683	1.12327		-0.993458	-0.864839	-1.13502		-0.967931	-0.852888	-1.13306	-0.971213	-0.8378	-1.12434
237	0.279281	0.324785	1.28508		-0.844097	-0.924301	-1.20206		-0.829743	-0.888155	-1.22113	-0.821261	-0.920452	-1.18349
238	1.25556	0.565714	0.653557		-1.11641	-0.890512	-0.950848		-1.14396	-0.897477	-0.94153	-1.09834	-0.884175	-0.94226
239	0.444615	0.987518	1.33282		-0.721696	-1.07667	-1.13987		-0.666263	-1.06471	-1.16644	-0.729217	-1.04164	-1.12595
240	1.07089	0.26229	1.27917		-1.11549	-0.532351	-1.15783		-1.1201	-0.469913	-1.18292	-1.09898	-0.566924	-1.13756
241	0.772609	1.19718	0.641785		-0.977706	-1.0922	-0.88756		-0.97002	-1.11342	-0.874251	-0.960586	-1.08034	-0.87452
242	1.09867	0.871733	1.32164		-1.01186	-0.92044	-1.07133		-1.00616	-0.914455	-1.0824	-1.00215	-0.903285	-1.05368
243	0.432045	1.42349	0.280898		-0.973382	-1.15694	-0.73232		-0.929961	-1.15527	-0.729265	-0.967334	-1.14358	-0.719009
244	0.364802	1.36143	0.46317		-0.825666	-1.15622	-0.941163		-0.791088	-1.17191	-0.902262	-0.813378	-1.13839	-0.945311
245	0.844651	0.787096	1.34121		-0.964557	-0.934256	-1.10723		-0.932826	-0.908559	-1.11734	-0.954176	-0.923442	-1.08399
246	0.361198	1.18038	1.11613		-0.642273	-1.12354	-1.12416		-0.579084	-1.13413	-1.1601	-0.650616	-1.10332	-1.10712
247	0.447977	0.402987	1.30841		-0.927823	-0.874453	-1.18182		-0.910489	-0.836228	-1.21016	-0.911645	-0.877076	-1.155
248	0.284419	1.16104	0.330432		-0.841674	-1.16192	-0.911235		-0.831906	-1.17622	-0.897204	-0.82673	-1.15229	-0.902276
249	1.26358	0.456493	1.1067		-1.10726	-0.718683	-1.09861		-1.13934	-0.65273	-1.09713	-1.07789	-0.729715	-1.07972
250	0.37748	1.19495	0.260133		-0.964593	-1.15506	-0.755447		-0.928908	-1.14868	-0.743855	-0.951712	-1.14343	-0.738494
251	0.970767	1.0788	0.386627		-1.0789	-1.09583	-0.676487		-1.0499	-1.11298	-0.642379	-1.056	-1.09311	-0.639242
252	0.506556	1.15726	0.442646		-0.93886	-1.13094	-0.862361		-0.915175	-1.14764	-0.836247	-0.928382	-1.11234	-0.855929
253	0.38241	1.15941	0.376398		-0.896837	-1.14846	-0.878155		-0.850149	-1.17789	-0.849997	-0.882844	-1.12958	-0.876252
254	1.26225	0.883762	1.19984		-1.04529	-0.916159	-1.03508		-1.04161	-0.877596	-1.02405	-1.02675	-0.896592	-1.02763
255	1.05204	1.18105	0.438545		-1.07502	-1.09431	-0.691582		-1.08917	-1.10559	-0.647601	-1.06348	-1.07112	-0.684933
256	0.85359	1.32298	0.970164		-0.930994	-1.07244	-0.981518		-0.897599	-1.04729	-0.96989	-0.914417	-1.05667	-0.966975
257	0.105438	0.235003	1.15738		-0.61744	-1.04474	-1.21216		-0.622971	-1.01349	-1.20967	-0.577027	-1.02323	-1.20528
258	0.509424	1.02571	0.52933		-0.917979	-1.11229	-0.92879		-0.918102	-1.09831	-0.924764	-0.892764	-1.09469	-0.930236
259	0.368507	1.42874	0.441545		-0.83721	-1.15908	-0.922773		-0.826871	-1.18208	-0.895758	-0.821202	-1.14356	-0.91984
260	0.307756	0.247708	1.15488		-0.940397	-0.826548	-1.20082		-0.900289	-0.818101	-1.19813	-0.932977	-0.812854	-1.1864
261	0.550943	1.56782	0.489584		-0.921597	-1.14641	-0.849736		-0.862384	-1.15565	-0.836762	-0.92102	-1.13132	-0.832509
262	1.3226	0.466026	1.02012		-1.11394	-0.734433	-1.0803		-1.12392	-0.720732	-1.05546	-1.10109	-0.730803	-1.07049
263	1.17602	0.296276	0.362274		-1.15595	-0.833394	-0.92744		-1.16795	-0.816799	-0.879635	-1.14299	-0.823536	-0.920884
264	1.12702	0.962925	0.286999		-1.11344	-1.09502	-0.562361		-1.11126	-1.11287	-0.534977	-1.10093	-1.0883	-0.545849
265	0.269666	0.334693	1.33411		-0.8235	-0.938635	-1.20369		-0.81947	-0.899725	-1.21065	-0.808093	-0.937501	-1.18538
266	1.19344	0.256532	0.326216		-1.16186	-0.814911	-0.931149		-1.16306	-0.788912	-0.908948	-1.15141	-0.796578	-0.911252
267	1.18834	0.555705	0.441569		-1.12746	-0.960657	-0.83693		-1.14255	-0.940461	-0.802214	-1.10246	-0.959089	-0.835894
268	0.409728	0.330073	1.29705		-0.946957	-0.836014	-1.19115		-0.912028	-0.830572	-1.20315	-0.926149	-0.795711	-1.17767
269	0.21256	0.202507	0.913344		-0.897018	-0.871448	-1.20379		-0.885044	-0.814883	-1.21409	-0.886623	-0.845139	-1.17325
270	0.306705	1.02842	1.1747		-0.601049	-1.1201	-1.14633		-0.541649	-1.12085	-1.15624	-0.609495	-1.10238	-1.12592
271	0.952284	1.07652	0.505662		-1.05419	-1.0796	-0.778974		-1.06552	-1.116	-0.730981	-1.02962	-1.06277	-0.774517
272	0.455933	1.33723	0.404726		-0.92006	-1.14827	-0.847191		-0.85395	-1.16408	-0.833402	-0.913563	-1.12828	-0.837616
273	0.184102	1.31774	1.04161		-0.413543	-1.16354	-1.15152		-0.393815	-1.17445	-1.13328	-0.415199	-1.15186	-1.145
274	0.458569	0.938934	1.18527		-0.759513	-1.07038	-1.12562		-0.73862	-1.06781	-1.14415	-0.749238	-1.06186	-1.10888
275	0.241892	0.292687	1.24517		-0.828596	-0.930816	-1.20612		-0.825543	-0.914633	-1.22685	-0.814383	-0.918875	-1.19633
276	1.18345	1.03691	0.245064		-1.11888	-1.10661	-0.486196		-1.13765	-1.11394	-0.455509	-1.10811	-1.0829	-0.506538
277	0.426576	1.17789	0.39535		-0.915044	-1.14363	-0.865697		-0.883983	-1.13309	-0.843461	-0.900265	-1.12839	-0.848651
278	1.15006	0.275878	0.150078		-1.16283	-0.997114	-0.656164		-1.18292	-0.982335	-0.650476	-1.15282	-1.00818	-0.609164
279	0.41094	1.26502	0.324859		-0.940331	-1.15256	-0.80494		-0.892349	-1.15801	-0.784043	-0.937704	-1.13793	-0.792006
280	1.14826	1.3035	0.2271		-1.11292	-1.12258	-0.429434		-1.12209	-1.13623	-0.37132	-1.10037	-1.11321	-0.462589
281	0.415018	1.12382	0.924693		-0.734609	-1.11437	-1.08617		-0.673408	-1.12153	-1.09067	-0.735014	-1.08923	-1.0654
282	0.38898	0.274611	1.34655		-0.969896	-0.788983	-1.19929		-0.940606	-0.749167	-1.1989	-0.964281	-0.759689	-1.17902
283	1.10791	0.808128	0.692508		-1.07264	-0.984778	-0.91311		-1.09823	-0.962804	-0.88967	-1.05304	-0.969168	-0.905568
284	0.343923	0.298544	1.3158		-0.923137	-0.848861	-1.20015		-0.907071	-0.817501	-1.21878	-0.914615	-0.840926	-1.1769
285	0.978606	1.23485	0.350184		-1.08087	-1.11243	-0.61643		-1.08511	-1.14297	-0.556546	-1.06452	-1.10036	-0.613419
286	1.21877	1.29982	0.777312		-1.04065	-1.05653	-0.853092		-1.06832	-1.05622	-0.810478	-1.01958	-1.04202	-0.855454
287	0.37136	1.15662	0.551468		-0.803472	-1.14089	-0.992861		-0.788774	-1.15302	-0.95874	-0.786025	-1.12201	-0.992063
288	1.27416	0.970495	0.805528		-1.06835	-0.992991	-0.908805		-1.09765	-0.9862	-0.904614	-1.05709	-0.982377	-0.893782
289	0.225917	1.04067	0.165629		-0.940725	-1.16761	-0.757066		-0.965049	-1.17126	-0.736971	-0.946911	-1.14838	-0.724025
290	1.05536	0.494105	0.36061		-1.13009	-0.974618	-0.807874		-1.13927	-0.93418	-0.783952	-1.11913	-0.945223	-0.793778
291	1.00846	0.815997	1.29636		-1.00378	-0.918008	-1.08238		-1.02427	-0.896316	-1.08531	-0.992886	-0.882915	-1.07297
292	0.334238	0.387623	1.27881		-0.854221	-0.931114	-1.19182		-0.852131	-0.904875	-1.20107	-0.841011	-0.920618	-1.17777
293	0.665455	1.24586	0.567632		-0.957891	-1.11311	-0.87428		-0.898994	-1.11296	-0.853377	-0.946864	-1.0935	-0.862632
294	1.16227	0.286282	0.197789		-1.16277	-0.956752	-0.742095		-1.16575	-0.93137	-0.68768	-1.14821	-0.931275	-0.708558
295	1.16954	0.921869	0.134648		-1.13023	-1.11799	-0.328471		-1.14652	-1.12114	-0.277928	-1.11823	-1.11817	-0.358453
296	1.09686	0.295438	0.354908		-1.15308	-0.841661	-0.925883		-1.17036	-0.787675	-0.903881	-1.1297	-0.835605	-0.914439
297	0.115206	1.28844	1.03108		-0.291683	-1.17247	-1.16314		-0.218353	-1.18074	-1.17111	-0.319822	-1.16393	-1.15615
298	1.26407	1.14928	0.542855		-1.08417	-1.06616	-0.741081		-1.10576	-1.0624	-0.706113	-1.06407	-1.05428	-0.745814
299	0.386569	0.903796	0.520139		-0.854025	-1.11771	-0.988033		-0.846311	-1.12182	-0.967617	-0.837323	-1.10329	-0.983925
300	0.588965	1.17679	0.915107		-0.846593	-1.09183	-1.0357		-0.795631	-1.08818	-1.05466	-0.796651	-1.05705	-1.02123
301	1.34902	0.993951	0.859932		-1.07041	-0.984461	-0.917425		-1.06127	-0.973483	-0.886183	-1.04243	-0.97168	-0.895583
302	1.45286	1.16625	0.356177		-1.11699	-1.09145	-0.561373		-1.14776	-1.10001	-0.487641	-1.10293	-1.07348	-0.594996
303	0.942061	1.23329	0.244848		-1.09847	-1.12414	-0.498244		-1.09815	-1.14124	-0.465386	-1.09177	-1.11738	-0.481185
304	1.26963	1.22728	0.771359		-1.05283	-1.04444	-0.853145		-1.05213	-1.04274	-0.825919	-1.04085	-1.02688	-0.855856
305	0.459775	0.342662	1.1812		-0.971683	-0.825479	-1.1787		-0.944716	-0.800591	-1.20814	-0.95717	-0.81503	-1.15469
306	1.18685	0.347594	0.385041		-1.15043	-0.865515	-0.906888		-1.17132	-0.868255	-0.899841	-1.13419	-0.86749	-0.898019
307	1.52352	0.475032	0.522773		-1.14702	-0.870972	-0.908794		-1.17415	-0.846595	-0.884703	-1.12337	-0.863098	-0.905759
308	1.23275	0.310047	0.501891		-1.14931	-0.764556	-1.00034		-1.16788	-0.715297	-0.984409	-1.13081	-0.756229	-0.988446
309	0.577403	1.14479	1.29395		-0.786991	-1.07203	-1.10656		-0.73847	-1.09223	-1.13611	-0.798558	-1.04898	-1.08942
310	1.37111	0.41675	1.00315		-1.12338	-0.694243	-1.08828		-1.13871	-0.628162	-1.12563	-1.1054	-0.720691	-1.06344
311	0.681012	1.35887	0.530096		-0.967992	-1.12299	-0.836965		-0.957348	-1.14234	-0.799235	-0.951724	-1.09676	-0.83855
312	1.28391	0.806278	0.414078		-1.11799	-1.03804	-0.71569		-1.13365	-0.982032	-0.718316	-1.09974	-1.03421	-0.696048
313	1.17092	0.44438	1.38058		-1.09184	-0.685172	-1.13499		-1.08355	-0.658133	-1.1441	-1.06424	-0.692906	-1.12529
314	0.269952	1.33048	0.258044		-0.880401	-1.16994	-0.842977		-0.863911	-1.18372	-0.811778	-0.881728	-1.15107	-0.839041
315	1.08331	0.241506	1.25053		-1.1195	-0.506253	-1.15852		-1.14725	-0.432728	-1.1758	-1.10346	-0.540267	-1.14179
316	0.271123	0.203705	1.09589		-0.952469	-0.801332	-1.20545		-0.920211	-0.814161	-1.22924	-0.955333	-0.764084	-1.19626
317	0.403111	1.37309	0.135509		-1.05957	-1.15479	-0.498572		-1.07521	-1.16539	-0.453202	-1.04428	-1.14815	-0.504414
318	1.25662	0.719941	0.654287		-1.10145	-0.954231	-0.902361		-1.12772	-0.951741	-0.886109	-1.07488	-0.950303	-0.89442
319	0.67911	0.500653	1.44024		-0.983586	-0.837668	-1.16177		-0.96496	-0.800474	-1.18099	-0.967963	-0.830178	-1.13913
320	0.341872	1.10962	0.373798		-0.869663	-1.15072	-0.90607		-0.842361	-1.17013	-0.871323	-0.852161	-1.141	-0.895611
321	0.868952	1.32126	0.383202		-1.05579	-1.11966	-0.665947		-1.0216	-1.16255	-0.628266	-1.03231	-1.10787	-0.666157
322	1.31657	0.438213	0.404546		-1.14713	-0.912125	-0.858297		-1.16194	-0.889183	-0.8527	-1.12575	-0.908809	-0.838728
323	1.34646	0.20935	1.02537		-1.13677	-0.460362	-1.14333		-1.16417	-0.411661	-1.13237	-1.12649	-0.480162	-1.12619
324	0.430312	1.3827	1.26893		-0.653761	-1.12324	-1.11905		-0.584138	-1.1311	-1.13662	-0.680562	-1.10365	-1.09779
325	0.225856	0.246822	1.2957		-0.851969	-0.900378	-1.21252		-0.825792	-0.895827	-1.22148	-0.846995	-0.888621	-1.20018
326	1.33208	0.747249	0.921184		-1.08709	-0.902282	-0.988993		-1.0988	-0.857501	-0.969016	-1.06855	-0.888227	-0.972417
327	0.29986	1.18231	0.315743		-0.866996	-1.16137	-0.883465		-0.827567	-1.15911	-0.867148	-0.843374	-1.14885	-0.873596
328	0.840238	0.224702	1.05804		-1.11042	-0.554221	-1.15863		-1.09442	-0.518051	-1.1876	-1.08651	-0.516166	-1.1415
329	0.583053	1.21376	0.658227		-0.899765	-1.11233	-0.949979		-0.854309	-1.09921	-0.931341	-0.871327	-1.10594	-0.924899
330	1.20698	0.205841	0.288305		-1.16777	-0.778503	-0.948792		-1.17265	-0.788483	-0.928214	-1.16568	-0.759892	-0.945184
331	0.725426	1.11953	0.61332		-0.97552	-1.09062	-0.893765		-0.946604	-1.13471	-0.871923	-0.964703	-1.07061	-0.885398
332	0.286245	0.323366	1.13081		-0.859008	-0.92274	-1.19467		-0.825249	-0.900606	-1.21689	-0.84055	-0.90544	-1.18046
333	1.10138	0.248483	0.38942		-1.15552	-0.764495	-0.98765		-1.15018	-0.757157	-0.979055	-1.1314	-0.729367	-0.989809
334	0.474756	1.06939	0.619552		-0.864124	-1.1149	-0.983039		-0.848874	-1.12852	-0.969543	-0.844609	-1.09778	-0.973742
335	0.81494	0.194355	0.949146		-1.11717	-0.527119	-1.15696		-1.14161	-0.461905	-1.17898	-1.10475	-0.53378	-1.15176
336	1.19623	0.254684	0.21441		-1.16644	-0.912496	-0.803328		-1.1645	-0.877051	-0.783554	-1.15884	-0.89277	-0.788744
337	0.327176	0.400156	1.23653		-0.841633	-0.945424	-1.18914		-0.828613	-0.921912	-1.20486	-0.817269	-0.932736	-1.17412
338	1.23767	0.512877	0.794112		-1.11222	-0.82465	-1.02023		-1.10086	-0.811316	-0.992245	-1.1057	-0.777673	-0.996199
339	0.648969	0.502707	1.07966		-0.990638	-0.876491	-1.12925		-0.96801	-0.841225	-1.13319	-0.979215	-0.85348	-1.11156
340	0.169932	1.10791	0.966282		-0.424948	-1.15936	-1.15424		-0.435738	-1.17862	-1.10868	-0.424825	-1.14244	-1.15089
341	0.341945	1.17118	1.31866		-0.595922	-1.12203	-1.14608		-0.549343	-1.12177	-1.15472	-0.609874	-1.10497	-1.13731
342	0.347022	0.977505	1.19162		-0.652525	-1.10405	-1.14313		-0.594577	-1.1077	-1.16654	-0.65883	-1.08314	-1.12605
343	0.153327	0.972743	0.265379		-0.71168	-1.17491	-0.997989		-0.696121	-1.18462	-0.980759	-0.694368	-1.16959	-0.985757
344	1.30196	0.366802	0.40441		-1.15258	-0.86424	-0.9032		-1.16527	-0.820009	-0.866142	-1.13124	-0.85044	-0.908822
345	1.2229	0.337507	0.290505		-1.15745	-0.917235	-0.82343		-1.16094	-0.918578	-0.764547	-1.14817	-0.878784	-0.803725
346	0.298358	0.335449	1.19432		-0.859518	-0.920887	-1.19559		-0.845766	-0.901884	-1.22591	-0.848307	-0.903738	-1.17644
347	0.353846	1.27513	0.387047		-0.863086	-1.15659	-0.899912		-0.819951	-1.16572	-0.881892	-0.842983	-1.14079	-0.89878
348	1.12381	1.15705	0.92318		-1.01766	-1.02641	-0.940254		-0.998293	-0.998565	-0.922593	-1.00933	-1.007	-0.914915
349	1.33856	1.31883	1.07697		-1.02417	-1.0197	-0.940592		-1.01404	-1.02094	-0.914172	-1.00851	-1.00598	-0.918502
350	0.977718	1.16022	1.28597		-0.946544	-1.01119	-1.04686		-0.968841	-1.00927	-0.979111	-0.972718	-0.985178	-0.997807
351	1.09835	0.514149	0.636763		-1.10923	-0.881288	-0.973534		-1.1226	-0.847914	-0.930863	-1.09079	-0.84601	-0.966237
352	1.04339	0.447936	1.28857		-1.07986	-0.720937	-1.13217		-1.06868	-0.6815	-1.15968	-1.05463	-0.712773	-1.12382
353	1.03202	0.297351	1.29825		-1.10691	-0.579805	-1.1558		-1.11268	-0.539791	-1.171	-1.08796	-0.5896	-1.14274
354	1.26022	0.51854	0.560246		-1.12757	-0.895325	-0.923586		-1.16011	-0.845778	-0.875089	-1.10467	-0.89161	-0.91695
355	1.1834	0.996282	1.13379		-1.02416	-0.964086	-1.01203		-1.03853	-0.975741	-1.0189	-1.01349	-0.955118	-0.997771
356	0.238951	1.11719	0.227581		-0.883109	-1.16835	-0.843973		-0.859531	-1.17803	-0.810504	-0.88349	-1.15307	-0.829877
357	0.263445	0.231744	1.29502		-0.911536	-0.842585	-1.21081		-0.886682	-0.816468	-1.224	-0.902022	-0.830836	-1.19512
358	1.03755	1.02466	0.137437		-1.12432	-1.12363	-0.333058		-1.11698	-1.13316	-0.335017	-1.12889	-1.10602	-0.31474
359	0.296341	0.409644	1.25249		-0.803206	-0.970775	-1.19188		-0.79186	-0.952996	-1.21015	-0.780059	-0.968027	-1.16907
360	0.246522	1.03652	1.38928		-0.500353	-1.13191	-1.16715		-0.454326	-1.12259	-1.18512	-0.518732	-1.11532	-1.15303
361	0.922355	0.26053	1.24694		-1.10571	-0.562955	-1.16194		-1.09018	-0.50992	-1.19047	-1.08132	-0.53947	-1.14447
362	0.439822	0.320362	1.20784		-0.972868	-0.813374	-1.18453		-0.952591	-0.806075	-1.18625	-0.96829	-0.792638	-1.16406
363	1.27691	0.727752	1.22474		-1.06603	-0.853875	-1.06355		-1.06493	-0.818785	-1.07047	-1.04678	-0.858417	-1.04672
364	0.389002	0.506803	1.25406		-0.837023	-0.968758	-1.17445		-0.812627	-0.954136	-1.17222	-0.792817	-0.963135	-1.15548
365	0.426823	1.10183	0.464305		-0.887518	-1.13453	-0.920748		-0.862861	-1.12964	-0.906797	-0.875444	-1.12279	-0.907586
366	1.04612	1.23617	0.296237		-1.0974	-1.11579	-0.542808		-1.09416	-1.136	-0.478601	-1.08855	-1.10253	-0.556264
367	1.20501	0.404176	0.3003		-1.15047	-0.954366	-0.785831		-1.17301	-0.915121	-0.764909	-1.13082	-0.945864	-0.775097
368	0.954344	0.657731	1.3469		-1.01904	-0.859359	-1.11386		-0.987819	-0.853265	-1.09181	-1.01494	-0.819596	-1.08604
369	1.18554	0.485777	1.03903		-1.09886	-0.761594	-1.08534		-1.11838	-0.71076	-1.06328	-1.07651	-0.740072	-1.06464
370	1.21261	0.367195	0.560672		-1.13972	-0.794476	-0.996212		-1.1468	-0.779263	-0.977283	-1.132	-0.772523	-0.985197
371	0.531454	1.48741	0.47775		-0.920292	-1.14514	-0.854761		-0.882613	-1.16544	-0.821104	-0.916706	-1.11908	-0.855329
372	0.234187	0.276624	1.33063		-0.831272	-0.92154	-1.21057		-0.820365	-0.903023	-1.22203	-0.823256	-0.916251	-1.19629
373	1.30494	0.840142	0.937027		-1.07335	-0.934173	-0.976099		-1.10361	-0.894789	-0.934179	-1.0552	-0.919812	-0.959831
374	0.26814	1.23787	0.255497		-0.883486	-1.16794	-0.844646		-0.876086	-1.18018	-0.819302	-0.868321	-1.15438	-0.843601
375	0.251837	1.37311	0.317862		-0.806369	-1.17226	-0.922877		-0.778824	-1.18716	-0.883522	-0.798711	-1.15257	-0.924667
376	0.358771	0.304652	1.03141		-0.940661	-0.858168	-1.18274		-0.932229	-0.843296	-1.19046	-0.912274	-0.850013	-1.16356
377	0.261253	0.310687	1.02925		-0.846236	-0.936393	-1.19281		-0.814464	-0.903568	-1.19476	-0.823746	-0.934985	-1.16455
378	0.475902	1.25992	0.376211		-0.947955	-1.14407	-0.816142		-0.915808	-1.17391	-0.778084	-0.940283	-1.12219	-0.80475
379	1.01739	0.216412	0.337451		-1.15818	-0.761824	-0.983954		-1.16769	-0.723718	-0.954276	-1.14517	-0.745152	-0.966254
380	0.402954	0.559428	1.41931		-0.814734	-0.979513	-1.17896		-0.781603	-0.960723	-1.18596	-0.796746	-0.982411	-1.15682
381	0.556741	0.423159	1.20826		-0.976984	-0.845211	-1.1626		-0.94799	-0.802484	-1.17539	-0.968919	-0.826911	-1.13621
382	0.949613	0.219978	0.421985		-1.1488	-0.715387	-1.03394		-1.15189	-0.715874	-0.998984	-1.13021	-0.712642	-1.02376
383	0.761936	0.712456	1.1824		-0.966027	-0.937458	-1.10303		-0.94874	-0.935239	-1.12879	-0.953994	-0.928405	-1.07993
384	1.34556	0.258763	0.285134		-1.16747	-0.846039	-0.885184		-1.17403	-0.825102	-0.866388	-1.15186	-0.839548	-0.878999
385	1.3246	0.238082	0.981331		-1.13673	-0.512127	-1.13376		-1.15825	-0.505414	-1.09313	-1.12451	-0.533448	-1.11761
386	0.899491	1.52285	1.12601		-0.905106	-1.0799	-0.998077		-0.867434	-1.08967	-0.97811	-0.8955	-1.05475	-0.97839
387	0.981152	1.48865	0.701337		-1.00025	-1.09812	-0.840066		-1.01464	-1.0983	-0.821932	-0.981919	-1.08483	-0.822389
388	1.39442	0.598809	1.14873		-1.09835	-0.788585	-1.06843		-1.12458	-0.752556	-1.08153	-1.07741	-0.801044	-1.05046
389	1.20735	1.2771	0.673996		-1.05398	-1.06646	-0.808118		-1.08327	-1.07242	-0.76768	-1.03373	-1.05219	-0.808465
390	1.26162	1.11993	1.3621		-1.0069	-0.963173	-1.03443		-0.997918	-0.962755	-1.04132	-0.995331	-0.957604	-1.01733
391	0.376844	1.03226	0.693478		-0.771189	-1.12254	-1.04955		-0.748399	-1.12107	-0.99188	-0.737274	-1.10091	-1.0389
392	0.370778	0.462346	1.14885		-0.850462	-0.960118	-1.17299		-0.836623	-0.933001	-1.17767	-0.845528	-0.949498	-1.15252
393	1.41764	0.609161	0.498414		-1.13322	-0.950247	-0.838818		-1.16446	-0.950396	-0.807826	-1.11179	-0.942116	-0.844216
394	1.32868	0.355898	0.968415		-1.12853	-0.651209	-1.10091		-1.14812	-0.601755	-1.11953	-1.1105	-0.674773	-1.08365
395	1.31301	0.993308	0.72802		-1.07836	-1.00805	-0.867312		-1.1033	-0.950494	-0.85075	-1.05954	-1.0063	-0.849895
396	0.372256	1.01243	0.304791		-0.939953	-1.14511	-0.825921		-0.911291	-1.14699	-0.811852	-0.93297	-1.13071	-0.807695
397	0.540635	1.10717	1.24266		-0.777068	-1.07588	-1.10846		-0.733937	-1.07246	-1.1337	-0.80274	-1.04316	-1.08173
398	0.370018	0.318352	0.952995		-0.94395	-0.869642	-1.17316		-0.889943	-0.853526	-1.16877	-0.9197	-0.827796	-1.16662
399	0.245467	0.265404	1.01698		-0.867567	-0.908829	-1.19871		-0.845402	-0.878483	-1.20832	-0.81508	-0.881318	-1.188
400	0.841991	1.11702	1.32626		-0.907149	-1.02002	-1.07431		-0.907677	-1.00751	-1.07393	-0.884019	-1.0017	-1.06576
401	0.500305	0.391841	1.15637		-0.968047	-0.849259	-1.16737		-0.935122	-0.852225	-1.20411	-0.95944	-0.82094	-1.14853
402	1.26169	0.948612	0.747494		-1.07413	-0.998453	-0.890354		-1.07412	-0.97668	-0.887452	-1.06147	-0.976243	-0.867289
403	1.07938	0.800722	1.43613		-1.01307	-0.888816	-1.09735		-0.979973	-0.874951	-1.09549	-1.01147	-0.868813	-1.07038
404	0.509075	1.15454	0.395459		-0.960008	-1.13374	-0.823601		-0.937905	-1.12879	-0.803888	-0.949661	-1.11555	-0.814021
405	1.39535	0.440436	0.524432		-1.14428	-0.85439	-0.93269		-1.16245	-0.798105	-0.907455	-1.12735	-0.838927	-0.921348
406	0.987473	0.250027	1.09081		-1.11663	-0.555362	-1.15063		-1.10922	-0.502538	-1.16901	-1.10065	-0.545977	-1.13226
407	1.11289	0.513937	0.727537		-1.10438	-0.854808	-1.00707		-1.12127	-0.850677	-0.975584	-1.08223	-0.818269	-1.02132
408	0.204103	1.2142	1.37256		-0.413537	-1.15221	-1.16585		-0.36523	-1.15069	-1.17997	-0.451039	-1.13576	-1.14438
409	1.08675	0.60734	0.55927		-1.10367	-0.949958	-0.903775		-1.13149	-0.906058	-0.863104	-1.0825	-0.952055	-0.883008
410	1.34111	0.354611	0.803022		-1.13579	-0.689517	-1.07126		-1.13241	-0.654939	-1.04175	-1.11181	-0.685024	-1.04889
411	0.314202	0.385531	1.11008		-0.845073	-0.949386	-1.1843		-0.812005	-0.930142	-1.18716	-0.812206	-0.935825	-1.1701
412	0.627728	0.773232	1.33143		-0.88668	-0.980998	-1.13068		-0.858546	-0.967674	-1.17239	-0.876639	-0.961528	-1.10948
413	1.22653	0.825176	0.653272		-1.0893	-0.988323	-0.877081		-1.11222	-0.973299	-0.83258	-1.07004	-0.970953	-0.860348
414	1.14101	1.21415	0.607218		-1.0579	-1.07112	-0.790046		-1.06474	-1.07124	-0.775184	-1.0484	-1.05786	-0.781921
415	1.34304	0.406383	0.459796		-1.14812	-0.862858	-0.915165		-1.16624	-0.825355	-0.896706	-1.13475	-0.858494	-0.900478
416	0.295306	0.335445	1.26999		-0.853352	-0.92065	-1.19928		-0.837194	-0.909436	-1.23205	-0.85068	-0.90682	-1.18652
417	1.1433	0.506014	0.43496		-1.12937	-0.943493	-0.857963		-1.13454	-0.967956	-0.82467	-1.1078	-0.944949	-0.827471
418	1.05677	1.22703	1.24663		-0.962609	-1.0163	-1.02364		-0.946691	-1.01605	-1.02686	-0.951607	-1.00499	-1.00836
419	0.57067	0.412381	1.25324		-0.985118	-0.828277	-1.1662		-0.937175	-0.829132	-1.16094	-0.97918	-0.806671	-1.14699
420	1.28547	1.15137	0.987905		-1.03783	-1.00474	-0.941595		-1.02015	-0.992137	-0.941989	-1.02945	-0.994397	-0.913328
421	0.655793	1.05889	1.00814		-0.879433	-1.05929	-1.05155		-0.84025	-1.0756	-1.022	-0.849042	-1.04136	-1.02811
422	1.06426	0.217115	1.26765		-1.12087	-0.473141	-1.16281		-1.14325	-0.384699	-1.18026	-1.10166	-0.513808	-1.14431
423	0.574555	1.13228	1.29408		-0.787345	-1.07082	-1.10776		-0.758825	-1.07296	-1.13766	-0.793975	-1.04987	-1.09215
424	1.26579	0.509385	0.39951		-1.139	-0.953782	-0.818695		-1.15756	-0.916265	-0.79691	-1.11859	-0.946092	-0.809733
425	0.558971	0.41163	1.04564		-0.991093	-0.849042	-1.14797		-0.945992	-0.826058	-1.15537	-0.982959	-0.828144	-1.12826
426	0.835705	1.30835	0.652712		-0.98563	-1.09703	-0.866008		-0.929104	-1.10808	-0.852079	-0.976286	-1.08077	-0.849903
427	0.354081	0.220835	0.968089		-1.00041	-0.762899	-1.18858		-1.00946	-0.716566	-1.19744	-0.990977	-0.739208	-1.16533
428	1.2912	0.499779	0.428312		-1.13941	-0.935441	-0.845301		-1.17712	-0.922927	-0.826319	-1.11339	-0.932576	-0.840991
429	0.997924	0.361948	0.274391		-1.14607	-0.954366	-0.798566		-1.12784	-0.930481	-0.759704	-1.12177	-0.96725	-0.748906
430	0.216224	1.17438	0.908411		-0.504817	-1.155	-1.13709		-0.515284	-1.1495	-1.13367	-0.488056	-1.14774	-1.12044
431	1.2744	1.20956	1.46068		-0.992555	-0.973103	-1.04033		-0.966553	-0.949405	-1.02568	-0.980083	-0.952745	-1.01815
432	0.713938	1.39003	0.923642		-0.882443	-1.09772	-0.993382		-0.853804	-1.09252	-0.978172	-0.864225	-1.07822	-0.986257
433	0.164879	1.03831	0.826647		-0.451486	-1.15967	-1.14688		-0.43431	-1.1623	-1.13589	-0.434634	-1.14604	-1.13441
434	0.237254	1.27719	0.311922		-0.796048	-1.17163	-0.934616		-0.772933	-1.17437	-0.907457	-0.778762	-1.15672	-0.918034
435	1.09361	0.358249	0.626022		-1.12921	-0.772102	-1.03194		-1.15378	-0.716917	-1.00381	-1.10311	-0.768359	-1.00606
436	0.49122	1.26042	0.533884		-0.888203	-1.13404	-0.920954		-0.875061	-1.13913	-0.912239	-0.875723	-1.12488	-0.910888
437	0.827076	1.19874	0.602826		-1.00119	-1.09133	-0.852764		-0.969909	-1.10533	-0.83171	-0.980648	-1.07693	-0.84398
438	0.844551	0.688886	1.26183		-0.990573	-0.90326	-1.10855		-0.965063	-0.875168	-1.10447	-0.975154	-0.891257	-1.08857
439	0.325319	1.18456	1.30288		-0.578287	-1.12689	-1.14709		-0.516542	-1.14521	-1.17089	-0.606141	-1.10862	-1.12708
440	0.253709	1.36985	1.24228		-0.477751	-1.1519	-1.14964		-0.41463	-1.16913	-1.1512	-0.508	-1.13537	-1.13656
441	1.16519	0.274903	0.466769		-1.15132	-0.747529	-1.0084		-1.16316	-0.717967	-0.96667	-1.14012	-0.722158	-1.00067
442	1.11992	0.317672	0.401415		-1.14915	-0.833227	-0.943046		-1.16514	-0.795542	-0.900884	-1.13225	-0.815111	-0.929353
443	0.456187	1.14803	1.06093		-0.738514	-1.10407	-1.09759		-0.678392	-1.10639	-1.10798	-0.754731	-1.08088	-1.0768
444	1.25329	1.0332	1.05502		-1.03786	-0.974929	-0.980743		-1.0149	-0.978004	-0.968548	-1.02734	-0.958341	-0.968154
445	1.26384	0.295167	1.50325		-1.11724	-0.517212	-1.15907		-1.14142	-0.430984	-1.17887	-1.09947	-0.547175	-1.1443
446	0.949332	0.531424	1.20387		-1.05164	-0.80683	-1.11508		-1.03832	-0.763754	-1.12571	-1.01521	-0.767154	-1.09636
447	1.16022	0.353471	0.416218		-1.14675	-0.85436	-0.927262		-1.1633	-0.797937	-0.909724	-1.13419	-0.833144	-0.91146
448	1.48996	0.539728	0.469643		-1.14334	-0.928657	-0.84511		-1.15133	-0.878957	-0.81806	-1.1161	-0.930812	-0.820294
449	0.427959	1.51993	1.04817		-0.675706	-1.13772	-1.08744		-0.622311	-1.15049	-1.10611	-0.703158	-1.11579	-1.06688
450	1.42559	1.17124	0.556946		-1.09558	-1.05989	-0.72665		-1.11604	-1.05031	-0.686393	-1.07348	-1.05321	-0.729073
451	1.01268	0.209115	0.458099		-1.15045	-0.671825	-1.05493		-1.13653	-0.651935	-1.0421	-1.14202	-0.60796	-1.04182
452	1.09934	0.220457	0.262711		-1.16527	-0.828038	-0.909903		-1.17173	-0.818984	-0.855451	-1.15717	-0.811687	-0.906802
453	1.39002	0.375433	0.512784		-1.14993	-0.811373	-0.961462		-1.16555	-0.80367	-0.962685	-1.13635	-0.807357	-0.947474
454	1.10009	0.517726	0.41598		-1.12656	-0.959224	-0.841302		-1.13715	-0.91689	-0.80641	-1.10193	-0.96085	-0.814617
455	1.13794	1.00932	1.28121		-1.00309	-0.958128	-1.04428		-0.960515	-0.93887	-1.01761	-0.984006	-0.938749	-1.03663
456	0.752871	0.61068	1.5614		-0.9682	-0.869172	-1.15428		-0.946282	-0.823168	-1.19045	-0.95353	-0.86059	-1.12734
457	0.334132	0.352705	1.19274		-0.880975	-0.909022	-1.19053		-0.860495	-0.893018	-1.19647	-0.861726	-0.906645	-1.17366
458	1.25912	0.853951	1.0799		-1.05614	-0.921938	-1.01469		-1.05286	-0.911319	-1.02047	-1.03459	-0.893553	-1.01036
459	0.641499	1.29604	0.834032		-0.877177	-1.10222	-0.991356		-0.868725	-1.12415	-0.971689	-0.863219	-1.08576	-0.983084
460	0.247383	0.226006	1.19303		-0.903085	-0.854627	-1.2095		-0.901745	-0.81696	-1.23153	-0.878515	-0.830167	-1.19184
461	1.40522	0.843691	0.61926		-1.107	-0.990063	-0.837353		-1.12312	-0.98871	-0.787128	-1.09208	-0.967154	-0.820533
462	0.596474	1.12777	0.766714		-0.887078	-1.09417	-0.994397		-0.866871	-1.07305	-1.01377	-0.853264	-1.07454	-0.997472
463	0.37235	1.19728	1.02953		-0.665741	-1.12525	-1.11039		-0.594156	-1.13892	-1.13838	-0.689234	-1.09497	-1.09479
464	1.17181	1.04583	0.221601		-1.12054	-1.11106	-0.453152		-1.13352	-1.12121	-0.404119	-1.11406	-1.09639	-0.473948
465	0.419672	1.28014	1.12818		-0.679722	-1.12081	-1.10904		-0.664382	-1.13673	-1.10631	-0.680771	-1.1088	-1.09899
466	1.05237	0.512977	0.833531		-1.0907	-0.836684	-1.04354		-1.12084	-0.778843	-1.00318	-1.06352	-0.818866	-1.0367
467	1.24026	0.320264	0.387594		-1.155	-0.837337	-0.925763		-1.16392	-0.807855	-0.877255	-1.136	-0.812557	-0.922596
468	0.286519	0.242729	1.28595		-0.923054	-0.834502	-1.20792		-0.907669	-0.835536	-1.22872	-0.911033	-0.815623	-1.19844
469	0.304553	0.228983	1.1307		-0.955031	-0.805586	-1.2016		-0.937453	-0.772435	-1.20987	-0.95385	-0.777259	-1.17131
470	0.115386	1.27946	0.93338		-0.306985	-1.17328	-1.15973		-0.253062	-1.17595	-1.17018	-0.343724	-1.1645	-1.14649
471	0.998382	1.257	0.52899		-1.0477	-1.09315	-0.760796		-1.07188	-1.11123	-0.725237	-1.02087	-1.0542	-0.799429
472	1.29754	0.573869	0.747959		-1.11303	-0.865622	-0.982392		-1.12693	-0.848538	-0.98112	-1.08976	-0.849145	-0.978154
473	1.11612	1.30022	0.831356		-1.0168	-1.05781	-0.891036		-1.00221	-1.03094	-0.880361	-0.998713	-1.04645	-0.861868

## Sheet: Zrc
		Aspect ratio				Analytical stress				FEM	CT		FEM	VA
	X	Y	Z		sxx	syy	szz		sxx	syy	szz	sxx	syy	szz
1	0.34546	1.33343	0.30978		-0.86022	-1.1196	-0.774811		-0.875949	-1.15127	-0.752783	-0.857036	-1.09874	-0.777764
2	0.445001	1.34259	0.375745		-0.888175	-1.11338	-0.773737		-0.827055	-1.11263	-0.728809	-0.885778	-1.09181	-0.771865
3	0.389465	0.507128	1.24996		-0.822974	-0.955361	-1.1933		-0.844851	-1.02135	-1.23147	-0.786264	-0.949959	-1.15908
4	0.572327	0.760422	1.33727		-0.852624	-0.985324	-1.15754		-0.858302	-0.985568	-1.17329	-0.835064	-0.977511	-1.13199
5	0.587736	1.15743	1.2996		-0.770581	-1.05171	-1.09975		-0.73122	-1.11377	-1.14814	-0.790528	-1.03103	-1.07684
6	0.562672	1.04327	0.431365		-0.946465	-1.09112	-0.795684		-0.905279	-1.12301	-0.760013	-0.927634	-1.06572	-0.791994
7	0.469297	0.629633	1.03774		-0.857159	-0.992137	-1.14865		-0.814499	-0.935581	-1.14184	-0.836869	-0.969323	-1.10973
8	1.09293	0.379623	0.342347		-1.1135	-0.881568	-0.803344		-1.10521	-0.844698	-0.770046	-1.09397	-0.859335	-0.775737
9	0.323248	0.2797	1.44181		-0.89811	-0.820399	-1.22653		-0.898094	-0.750608	-1.21443	-0.873363	-0.817141	-1.20154
10	0.363608	1.36028	0.288697		-0.882958	-1.11543	-0.731661		-0.833488	-1.11057	-0.695925	-0.877103	-1.09386	-0.713236
11	1.56365	0.384879	0.282152		-1.11297	-0.890609	-0.695246		-1.12366	-0.899759	-0.679855	-1.0975	-0.879004	-0.697161
12	1.26443	0.516333	1.18191		-1.0682	-0.718073	-1.07571		-1.14136	-0.670294	-1.13678	-1.05014	-0.743551	-1.05375
13	1.07667	0.280091	1.16329		-1.03756	-0.511774	-1.07265		-1.03302	-0.449847	-1.07845	-1.03521	-0.551457	-1.06124
14	0.218572	0.255823	1.08225		-0.818903	-0.903375	-1.22453		-0.766986	-0.885311	-1.21069	-0.823316	-0.877583	-1.20248
15	1.03477	1.16401	0.487214		-1.02276	-1.04539	-0.677221		-1.04103	-1.0183	-0.623882	-1.00319	-1.03498	-0.691517
16	0.945242	1.24588	0.519351		-1.00413	-1.06093	-0.71287		-1.00738	-1.05237	-0.652415	-0.989206	-1.04826	-0.721768
17	0.273052	0.232534	1.15514		-0.903904	-0.818015	-1.22449		-0.808574	-0.760703	-1.18126	-0.885385	-0.804408	-1.19442
18	1.20581	0.289495	1.01955		-1.05134	-0.527912	-1.05476		-1.07172	-0.482993	-1.07571	-1.03922	-0.547548	-1.04361
19	0.696006	1.00041	1.23416		-0.871986	-1.02446	-1.10128		-0.885833	-1.12078	-1.16855	-0.87237	-1.00611	-1.07519
20	0.983064	1.19329	1.32067		-0.939846	-1.01569	-1.05847		-0.976172	-1.09914	-1.12089	-0.925172	-0.995937	-1.02531
21	0.38508	0.279432	1.14459		-0.950981	-0.785995	-1.20453		-0.883247	-0.779284	-1.18798	-0.94053	-0.778859	-1.18289
22	1.23721	0.712851	1.20729		-1.05686	-0.841592	-1.06538		-1.10685	-0.856273	-1.09554	-1.03666	-0.830898	-1.047
23	1.26688	0.319929	1.11773		-1.05164	-0.5386	-1.0601		-1.06127	-0.482321	-1.08325	-1.04189	-0.562744	-1.04239
24	1.19161	0.356948	0.326413		-1.11747	-0.867001	-0.794046		-1.15103	-0.867845	-0.80294	-1.10424	-0.861154	-0.779915
25	1.26119	1.12009	1.36213		-1.00865	-0.963481	-1.04169		-1.03783	-0.991955	-1.06266	-0.994158	-0.955562	-1.01817
26	1.25803	0.84907	1.42133		-1.03444	-0.874236	-1.08484		-1.06465	-0.864125	-1.13681	-1.01311	-0.874089	-1.05355
27	0.315279	0.385791	1.27357		-0.819978	-0.925509	-1.21314		-0.766703	-0.8621	-1.19578	-0.811369	-0.921767	-1.17776
28	1.41773	0.609176	0.498357		-1.10413	-0.915611	-0.790395		-1.13701	-0.897614	-0.756387	-1.083	-0.907334	-0.797483
29	1.31303	0.993302	0.728014		-1.06207	-0.989158	-0.83384		-1.1079	-0.938169	-0.816177	-1.03785	-0.981502	-0.812656
30	0.376079	0.262153	1.03193		-0.961439	-0.777918	-1.19853		-0.853021	-0.741234	-1.16786	-0.94966	-0.751636	-1.15902
31	0.37218	1.01261	0.30476		-0.901237	-1.10976	-0.772575		-0.877989	-1.13037	-0.762129	-0.893821	-1.08785	-0.753472
32	0.370044	0.318303	0.952996		-0.933648	-0.857894	-1.19649		-0.891816	-0.863472	-1.19673	-0.912409	-0.820854	-1.17406
33	0.245448	0.265401	1.01722		-0.850584	-0.892183	-1.22106		-0.815842	-0.886489	-1.21043	-0.808785	-0.860851	-1.1881
34	0.350534	1.27445	0.279123		-0.884235	-1.11513	-0.734956		-0.899073	-1.13335	-0.699031	-0.874155	-1.09939	-0.743226
35	0.40146	1.1435	0.317791		-0.902291	-1.11006	-0.754571		-0.834127	-1.10978	-0.740688	-0.886204	-1.09029	-0.734819
36	0.653692	1.03891	0.792159		-0.909022	-1.06704	-0.987564		-0.894536	-1.12868	-0.940204	-0.891645	-1.03916	-0.972205
37	1.25912	0.910839	1.53247		-1.02182	-0.887078	-1.09531		-0.9708	-0.853911	-1.06855	-1.0064	-0.863459	-1.07489
38	1.39533	0.440471	0.524389		-1.11598	-0.81991	-0.890138		-1.12904	-0.762079	-0.859768	-1.09273	-0.804961	-0.875452
39	0.987742	0.282216	1.09101		-1.04199	-0.543779	-1.08113		-1.02674	-0.488691	-1.09798	-1.02446	-0.538205	-1.05144
40	1.30113	1.12774	0.808514		-1.04569	-1.00688	-0.850486		-1.01991	-0.965713	-0.830581	-1.02514	-0.988517	-0.831356
41	1.11282	0.513959	0.727537		-1.09061	-0.834321	-0.98856		-1.09136	-0.824735	-0.933192	-1.05397	-0.793881	-0.988078
42	1.08677	0.607285	0.559292		-1.08868	-0.929566	-0.873217		-1.11921	-0.886588	-0.816436	-1.05912	-0.924432	-0.847022
43	0.602414	1.1175	0.344414		-0.969833	-1.08222	-0.6741		-0.935982	-1.10043	-0.654	-0.966245	-1.04876	-0.652141
44	0.767748	1.38111	0.696902		-0.930727	-1.08924	-0.866915		-0.931403	-1.10046	-0.825299	-0.913951	-1.07363	-0.860155
45	0.764805	1.19368	1.07135		-0.890861	-1.05577	-1.03304		-0.862741	-1.06768	-1.02349	-0.869695	-1.03862	-1.02406
46	0.250168	1.18985	0.197229		-0.871587	-1.11761	-0.713352		-0.841036	-1.11692	-0.715667	-0.859325	-1.1032	-0.706785
47	1.34308	0.406519	0.459741		-1.11793	-0.826617	-0.869298		-1.11361	-0.759129	-0.815165	-1.09811	-0.817202	-0.851863
48	0.295265	0.33551	1.26963		-0.835463	-0.903307	-1.22049		-0.825451	-0.883632	-1.24183	-0.833597	-0.893213	-1.19807
49	1.05679	1.22702	1.24663		-0.962097	-1.01761	-1.02816		-0.915559	-0.953998	-0.999191	-0.9466	-1.00101	-1.00544
50	0.721171	0.988326	1.31499		-0.877809	-1.01325	-1.11304		-0.898527	-1.10315	-1.1995	-0.87828	-0.994552	-1.07946
51	1.34388	1.08616	0.805409		-1.05397	-0.996316	-0.850877		-1.05046	-1.0066	-0.808826	-1.03398	-0.974512	-0.848893
52	0.168473	1.07726	1.16051		-0.34072	-0.995204	-1.02201		-0.301374	-0.975907	-1.03524	-0.365218	-0.994005	-1.01265
53	0.783663	1.17811	1.23825		-0.879846	-1.04136	-1.06945		-0.887762	-1.03906	-1.06916	-0.862517	-1.02138	-1.04744
54	1.26578	0.509376	0.399647		-1.10567	-0.914968	-0.76596		-1.11558	-0.870011	-0.72947	-1.08592	-0.90441	-0.75757
55	0.558964	0.411623	1.04563		-0.982769	-0.837591	-1.166		-0.936797	-0.79327	-1.17254	-0.972427	-0.821497	-1.13711
56	0.606905	0.57519	1.24156		-0.936631	-0.911124	-1.16788		-0.863735	-0.853284	-1.16352	-0.92863	-0.897795	-1.13263
57	0.968066	1.31608	0.397829		-1.00521	-1.05256	-0.585002		-1.00645	-1.05251	-0.515222	-0.992558	-1.04485	-0.610943
58	1.25052	0.603309	1.18701		-1.06585	-0.780492	-1.07209		-1.13775	-0.754643	-1.12682	-1.04711	-0.794174	-1.04721
59	0.336763	0.281561	1.2188		-0.915809	-0.821442	-1.21798		-0.895209	-0.812254	-1.23857	-0.909819	-0.81927	-1.19628
60	1.20961	0.927563	1.43139		-1.01809	-0.909745	-1.0835		-0.963176	-0.871111	-1.05403	-0.997939	-0.898301	-1.06001
61	1.24336	0.44867	0.27363		-1.09745	-0.934525	-0.653368		-1.106	-0.873533	-0.652772	-1.08333	-0.929033	-0.653807
62	0.69179	1.20281	0.409081		-0.973718	-1.08065	-0.697672		-0.951439	-1.08981	-0.685208	-0.95869	-1.0644	-0.69548
63	1.21539	0.606121	0.31614		-1.08024	-0.968309	-0.625667		-1.08749	-0.95236	-0.615583	-1.06773	-0.951688	-0.619543
64	1.01567	0.220484	0.269804		-1.1228	-0.781144	-0.866278		-1.1122	-0.76511	-0.816324	-1.10353	-0.760377	-0.855028
65	1.2046	1.30476	0.855717		-1.01493	-1.03697	-0.859096		-1.03085	-1.0429	-0.846219	-0.997858	-1.02706	-0.846746
66	0.276881	1.13524	0.257322		-0.849609	-1.12118	-0.783304		-0.795405	-1.12444	-0.769295	-0.842668	-1.10284	-0.778932
67	1.17524	0.292635	0.349146		-1.12133	-0.797653	-0.868954		-1.12395	-0.764676	-0.814741	-1.09565	-0.789931	-0.861761
68	0.771404	0.270544	1.19772		-1.02689	-0.570544	-1.11556		-1.02829	-0.560755	-1.13894	-0.992025	-0.568093	-1.09883
69	0.734375	1.30725	1.20374		-0.842139	-1.06234	-1.05419		-0.848809	-1.13129	-1.04124	-0.836275	-1.03995	-1.03411
70	0.308095	1.41021	0.251743		-0.867261	-1.11872	-0.728908		-0.874087	-1.13236	-0.705301	-0.857367	-1.10258	-0.732601
71	0.455329	0.377169	0.969025		-0.955515	-0.864046	-1.17857		-0.956902	-0.800668	-1.16682	-0.926041	-0.844905	-1.1556
72	0.73423	0.91058	1.25724		-0.905814	-0.998465	-1.11283		-0.879417	-0.9595	-1.10346	-0.888488	-0.983933	-1.09182
73	1.1282	0.656618	0.548859		-1.08613	-0.945949	-0.842026		-1.09196	-0.902739	-0.818006	-1.06434	-0.939481	-0.823791
74	0.52975	1.25334	0.6311		-0.853732	-1.10338	-0.924506		-0.815085	-1.12727	-0.869591	-0.834252	-1.08078	-0.926529
75	1.05043	0.830983	0.657456		-1.05495	-0.988941	-0.872931		-1.06539	-1.06926	-0.861148	-0.999129	-0.977423	-0.823887
76	1.22442	0.257369	0.330568		-1.12211	-0.766777	-0.878281		-1.10455	-0.7355	-0.802423	-1.10108	-0.753338	-0.87522
77	1.33061	0.990689	0.445029		-1.05599	-1.00605	-0.623958		-1.06214	-0.973092	-0.579768	-1.04179	-0.995442	-0.621225
78	0.241171	0.207378	1.08127		-0.899137	-0.818052	-1.22659		-0.863992	-0.789256	-1.20867	-0.889039	-0.805866	-1.21056
79	1.21408	0.888521	1.02021		-1.04874	-0.939977	-0.994222		-1.05256	-0.920863	-0.960482	-1.02588	-0.91537	-0.974114
80	1.11496	1.33279	1.14713		-0.972445	-1.0334	-0.979903		-0.962393	-1.02981	-0.969261	-0.954719	-1.01167	-0.955128
81	0.330166	0.312564	1.33181		-0.883962	-0.854899	-1.22313		-0.916885	-0.88388	-1.29237	-0.885712	-0.857936	-1.20149
82	0.30224	1.15472	0.18669		-0.915491	-1.10256	-0.632886		-0.900037	-1.08392	-0.596331	-0.890087	-1.08239	-0.605885
83	0.464099	0.247424	1.12566		-0.994247	-0.685508	-1.17536		-0.950944	-0.665127	-1.17576	-0.982033	-0.683947	-1.15342
84	0.219425	0.260219	1.19434		-0.81011	-0.902189	-1.22686		-0.822091	-0.929479	-1.26865	-0.801035	-0.895472	-1.20211
85	0.318082	1.26794	0.930998		-0.575206	-1.06649	-1.04585		-0.523497	-1.06739	-1.01796	-0.580817	-1.05693	-1.02621
86	0.943086	0.775523	1.15506		-1.00698	-0.926899	-1.0844		-1.0116	-0.927032	-1.05945	-0.967562	-0.909223	-1.05294
87	0.449523	1.19863	1.02952		-0.700983	-1.07338	-1.06456		-0.658102	-1.143	-1.12571	-0.724624	-1.05115	-1.04959
88	1.17142	1.04613	0.22159		-1.0096	-0.999909	-0.373255		-1.01623	-1.00002	-0.32282	-1.00689	-0.991729	-0.398563
89	0.419665	1.28008	1.12817		-0.641765	-1.0671	-1.06882		-0.625144	-1.10858	-1.05078	-0.644606	-1.05451	-1.05526
90	1.05239	0.512978	0.833592		-1.07811	-0.817652	-1.03209		-1.14514	-0.788223	-1.00033	-1.05177	-0.801965	-1.01651
91	1.2403	0.320397	0.387612		-1.12046	-0.797498	-0.876316		-1.10931	-0.763098	-0.802142	-1.09203	-0.771846	-0.864939
92	1.14101	0.376759	0.41389		-1.11572	-0.840973	-0.86847		-1.12563	-0.79007	-0.809109	-1.09283	-0.837373	-0.857498
93	1.10463	1.27923	0.697037		-1.01299	-1.04893	-0.796723		-0.97947	-1.03405	-0.755964	-0.993028	-1.03096	-0.789226
94	0.286494	0.242761	1.28581		-0.902099	-0.81311	-1.22633		-0.90811	-0.829694	-1.25231	-0.894382	-0.800135	-1.20736
95	0.305265	0.229564	1.1226		-0.933572	-0.783375	-1.21563		-0.937278	-0.772448	-1.24304	-0.937182	-0.766854	-1.17262
96	0.116683	1.27542	0.933243		-0.255295	-0.972468	-0.976056		-0.19779	-0.954222	-0.964825	-0.292002	-0.982147	-0.978166
97	0.774624	0.707153	1.13913		-0.975507	-0.936125	-1.11474		-0.995143	-0.963254	-1.1052	-0.954998	-0.928917	-1.08062
98	1.29754	0.573866	0.747972		-1.0975	-0.843272	-0.958634		-1.12597	-0.818229	-0.93799	-1.07013	-0.82631	-0.949828
99	0.274583	1.15128	0.258609		-0.845612	-1.12171	-0.786471		-0.797032	-1.1012	-0.709572	-0.834376	-1.10166	-0.776517
100	1.18497	0.290748	0.269251		-1.12107	-0.850734	-0.782385		-1.10665	-0.78914	-0.733831	-1.10522	-0.838508	-0.781623
101	1.16817	0.706044	0.591473		-1.08296	-0.950256	-0.848936		-1.10904	-0.920247	-0.823755	-1.06052	-0.94087	-0.838243
102	1.19098	0.711835	0.807883		-1.07635	-0.910522	-0.958339		-1.06527	-0.903306	-0.943358	-1.04824	-0.89386	-0.940955
103	1.14151	0.336122	0.427144		-1.11648	-0.798461	-0.903326		-1.09425	-0.788679	-0.799273	-1.09416	-0.768544	-0.897548
104	0.387553	1.00705	0.353527		-0.889153	-1.11019	-0.819022		-0.894632	-1.11162	-0.822987	-0.878301	-1.08162	-0.814099
105	0.512779	0.372105	1.34598		-0.958969	-0.796747	-1.19703		-0.89514	-0.798193	-1.18475	-0.945221	-0.747908	-1.15696
106	1.21423	1.16652	0.728987		-1.03556	-1.02537	-0.814211		-1.07407	-1.04658	-0.770557	-1.01997	-1.00729	-0.809993
107	0.594986	1.3591	0.525532		-0.907011	-1.10435	-0.822582		-0.889348	-1.12579	-0.795316	-0.899469	-1.08238	-0.804855
108	1.1547	1.24794	0.327284		-1.01566	-1.02485	-0.478994		-1.00472	-1.02042	-0.395393	-1.01044	-1.01957	-0.512547
109	1.33242	0.359045	0.420651		-1.12016	-0.808443	-0.869921		-1.13294	-0.766174	-0.854659	-1.09665	-0.801104	-0.856167
110	0.627189	0.582453	1.43674		-0.929768	-0.893574	-1.18279		-0.915001	-0.886438	-1.18689	-0.919925	-0.842474	-1.13955
111	0.296329	1.10085	1.3524		-0.503193	-1.0302	-1.08053		-0.412015	-1.05485	-1.08143	-0.549391	-1.02367	-1.07922
112	1.33881	0.377721	0.756609		-1.09444	-0.683644	-1.00827		-1.10497	-0.660517	-0.942622	-1.07682	-0.675588	-0.982268
113	1.16711	0.908186	0.738161		-1.05629	-0.984697	-0.880568		-1.09293	-0.985105	-0.879284	-1.03008	-0.977244	-0.864624
114	0.709515	1.31448	0.267664		-0.982022	-1.05673	-0.50695		-0.944332	-1.0438	-0.447538	-0.95829	-1.05103	-0.524747
115	1.19977	0.637881	0.781922		-1.08511	-0.881181	-0.96565		-1.14021	-0.867808	-0.94225	-1.0613	-0.86303	-0.956835
116	1.25904	1.03463	1.19403		-1.02848	-0.957331	-1.01421		-0.973538	-0.900768	-0.967909	-1.01495	-0.938676	-0.986861
117	0.471312	1.15192	0.393613		-0.908113	-1.1065	-0.792485		-0.848937	-1.12186	-0.762318	-0.884412	-1.07665	-0.769671
118	1.04602	1.29474	0.866955		-0.987887	-1.05049	-0.895035		-0.945602	-1.0363	-0.886937	-0.970081	-1.03239	-0.865314
119	1.05497	1.31615	0.402513		-1.01203	-1.04508	-0.569501		-1.02515	-1.01544	-0.517099	-0.990662	-1.03936	-0.578234
120	0.389541	0.447767	1.13288		-0.863169	-0.933128	-1.19474		-0.801807	-0.864532	-1.18566	-0.847327	-0.922799	-1.15824
121	0.417586	1.37217	0.474157		-0.826242	-1.1177	-0.871184		-0.760915	-1.12004	-0.796947	-0.813235	-1.08443	-0.861225
122	0.178733	0.284478	1.22315		-0.707259	-0.952272	-1.20839		-0.675555	-0.856257	-1.16571	-0.688715	-0.952854	-1.18419
123	0.306802	1.258	0.851287		-0.582977	-1.07134	-1.03769		-0.522783	-1.0932	-1.05564	-0.610289	-1.0659	-1.01451
124	1.09677	0.904328	0.243492		-1.02529	-1.00483	-0.441281		-1.0206	-1.01227	-0.371743	-1.00535	-0.990498	-0.437162
125	0.341756	0.399664	1.00854		-0.857699	-0.936348	-1.19481		-0.857367	-0.930957	-1.23426	-0.839218	-0.932924	-1.16723
126	1.43875	0.522039	0.386576		-1.10688	-0.913783	-0.731655		-1.11963	-0.886528	-0.692439	-1.08642	-0.908963	-0.735339
127	0.373895	0.968892	1.13673		-0.652901	-1.04975	-1.10326		-0.602905	-1.10721	-1.15143	-0.674841	-1.03639	-1.07997
128	1.00564	1.11308	1.24598		-0.964079	-1.00326	-1.04948		-1.01793	-1.0732	-1.11683	-0.95582	-0.983068	-1.02697
129	0.336043	0.411248	1.24326		-0.826693	-0.931124	-1.20819		-0.770352	-0.878285	-1.18948	-0.821697	-0.91923	-1.1824
130	0.257202	1.36806	0.43216		-0.685762	-1.11171	-0.938138		-0.655726	-1.10404	-0.877628	-0.664595	-1.08417	-0.935324
131	1.10712	0.552327	0.463804		-1.09691	-0.927737	-0.820656		-1.10706	-0.904988	-0.789213	-1.07947	-0.91393	-0.808618
132	0.745951	1.36548	0.652463		-0.933166	-1.09086	-0.849978		-0.86699	-1.12469	-0.811592	-0.920165	-1.06714	-0.842014
133	0.306479	1.25979	0.386912		-0.782297	-1.12056	-0.884277		-0.729141	-1.11724	-0.82939	-0.769566	-1.09686	-0.881338
134	0.991589	1.18297	0.164406		-0.984435	-0.995551	-0.29481		-0.987304	-0.993583	-0.233468	-0.972825	-0.993612	-0.333168
135	0.25901	0.166948	1.20899		-0.946065	-0.713089	-1.21234		-0.884608	-0.680389	-1.18679	-0.939142	-0.698436	-1.18758
136	0.513101	1.09512	1.18133		-0.745933	-1.05669	-1.09517		-0.705569	-1.08921	-1.13802	-0.763069	-1.04128	-1.07409
137	1.17352	0.786381	0.74714		-1.06994	-0.949702	-0.914177		-1.06921	-0.911252	-0.879996	-1.05303	-0.90631	-0.874946
138	1.19877	0.291578	0.326025		-1.12242	-0.810682	-0.846451		-1.14387	-0.789587	-0.836925	-1.09917	-0.808562	-0.838198
139	1.29751	0.535846	0.434053		-1.10553	-0.913148	-0.781629		-1.13542	-0.88485	-0.762336	-1.08901	-0.905719	-0.778332
140	1.22537	0.965802	0.486594		-1.05617	-1.01005	-0.682863		-1.08477	-1.01996	-0.654677	-1.03053	-0.982278	-0.643508
141	1.05666	0.864251	0.271281		-1.03434	-1.00942	-0.496162		-1.04551	-0.984081	-0.469865	-1.02333	-0.995765	-0.501538
142	0.317804	1.16985	0.29446		-0.857362	-1.11952	-0.790494		-0.812961	-1.11333	-0.749326	-0.850947	-1.10464	-0.772381
143	1.18759	0.301499	0.192606		-1.105	-0.910274	-0.643936		-1.10343	-0.885429	-0.619105	-1.0935	-0.898063	-0.644249
144	0.331283	1.20698	0.197219		-0.921601	-1.09968	-0.621661		-0.882064	-1.10122	-0.628909	-0.909035	-1.0844	-0.599388
145	0.339499	0.269608	1.16518		-0.928168	-0.80737	-1.21451		-0.837082	-0.765552	-1.18258	-0.925401	-0.78499	-1.17517
146	0.517345	1.31793	0.394147		-0.916543	-1.10559	-0.75149		-0.848879	-1.10114	-0.693458	-0.90841	-1.07883	-0.733606
147	0.266203	0.375141	1.27323		-0.76755	-0.946712	-1.20976		-0.728044	-0.852424	-1.16599	-0.746455	-0.943706	-1.18621
148	1.09815	0.490429	0.330486		-1.09674	-0.941105	-0.717178		-1.11932	-0.923535	-0.727069	-1.06991	-0.931716	-0.677854
149	0.609868	0.544447	1.1974		-0.950755	-0.897007	-1.16565		-0.979273	-0.925304	-1.2347	-0.946541	-0.887156	-1.13652
150	1.02357	0.153656	0.289205		-1.10529	-0.636141	-0.946191		-1.10997	-0.628666	-0.939196	-1.08759	-0.643406	-0.931205
151	1.01811	1.14356	1.3199		-0.956725	-1.00237	-1.05985		-0.954197	-0.987544	-1.05062	-0.942553	-0.981023	-1.03893
152	0.357824	1.19335	0.392873		-0.83184	-1.1184	-0.858617		-0.823787	-1.14028	-0.841437	-0.828427	-1.10239	-0.852335
153	1.18156	0.235157	0.979272		-1.03714	-0.462721	-1.04191		-1.04188	-0.382368	-1.05668	-1.03288	-0.49591	-1.02296
154	1.14789	1.23624	0.852107		-1.01308	-1.03426	-0.877907		-0.996358	-0.982465	-0.870053	-0.985002	-1.02068	-0.858193
155	1.02083	0.415262	0.308661		-1.10364	-0.922608	-0.74568		-1.11765	-0.872836	-0.747903	-1.06893	-0.930315	-0.707189
156	0.171767	0.270349	1.20008		-0.709846	-0.949742	-1.21003		-0.701355	-0.92376	-1.21698	-0.672299	-0.93421	-1.17741
157	1.17421	0.465197	0.547494		-1.10724	-0.847852	-0.912292		-1.14586	-0.801644	-0.870348	-1.07954	-0.840435	-0.907645
158	1.15075	1.05138	0.807299		-1.03528	-1.00898	-0.888171		-0.990831	-0.973004	-0.842243	-1.01156	-0.995362	-0.879514
159	1.03416	0.861109	1.36797		-0.998374	-0.9212	-1.10084		-0.988907	-0.92587	-1.11703	-0.985662	-0.912911	-1.07875
160	1.20102	1.14737	0.785129		-1.03331	-1.02087	-0.850665		-1.03816	-1.03417	-0.823581	-1.01621	-1.00625	-0.830356
161	0.824824	1.04888	1.29132		-0.912495	-1.01181	-1.09021		-0.883527	-0.97263	-1.05546	-0.89921	-0.996779	-1.07253
162	1.27224	0.277073	0.369383		-1.12069	-0.759947	-0.891396		-1.10166	-0.714126	-0.796077	-1.0968	-0.745742	-0.892043
163	0.787166	1.01971	1.25766		-0.906409	-1.01376	-1.09241		-0.904403	-0.984552	-1.07963	-0.895816	-0.993681	-1.06573
164	1.25133	1.36701	0.567968		-1.02571	-1.04236	-0.667459		-1.0345	-1.04038	-0.569045	-1.00846	-1.03093	-0.696368
165	0.474869	0.424538	1.22931		-0.926321	-0.870038	-1.19618		-0.844654	-0.805606	-1.17162	-0.909296	-0.863281	-1.16241
166	0.449711	0.700999	0.943506		-0.830669	-1.02428	-1.12223		-0.778577	-0.993147	-1.10656	-0.807986	-0.988965	-1.07267
167	0.567531	1.04364	0.731281		-0.876514	-1.08057	-0.984448		-0.87185	-1.14403	-1.00259	-0.871675	-1.05932	-0.96575
168	1.0504	0.364207	1.16031		-1.05148	-0.620476	-1.09315		-1.07422	-0.630132	-1.09758	-1.04116	-0.634463	-1.09077
169	0.990575	1.09692	0.715276		-1.01138	-1.03962	-0.861376		-1.02642	-1.06956	-0.870676	-0.995655	-1.01515	-0.826682
170	1.17374	0.574117	0.701979		-1.0925	-0.86925	-0.95277		-1.11655	-0.827656	-0.900157	-1.06714	-0.847791	-0.940208
171	0.308609	1.34041	0.265604		-0.860698	-1.11997	-0.7514		-0.792756	-1.09759	-0.702022	-0.853321	-1.10159	-0.745114
172	0.248337	1.19981	0.251404		-0.822212	-1.12417	-0.802264		-0.84032	-1.14668	-0.788307	-0.817652	-1.09976	-0.766455
173	1.05825	1.16741	0.727249		-1.01454	-1.04078	-0.841941		-0.993967	-1.08456	-0.841585	-1.00366	-1.01563	-0.825082
174	1.3054	0.318846	0.415275		-1.11975	-0.775148	-0.893691		-1.11341	-0.732514	-0.836606	-1.093	-0.757604	-0.889615
175	0.299992	0.215649	1.19192		-0.93698	-0.762226	-1.21611		-0.913562	-0.736051	-1.20993	-0.927409	-0.747707	-1.19216
176	1.06721	1.31163	0.472839		-1.01433	-1.05025	-0.634199		-1.01083	-1.02442	-0.537807	-0.990532	-1.04346	-0.662918
177	0.507515	1.21152	0.445549		-0.903353	-1.10631	-0.814665		-0.851584	-1.11764	-0.769481	-0.897826	-1.06735	-0.784652
178	1.29359	0.456464	0.428322		-1.11353	-0.876375	-0.819789		-1.14897	-0.858022	-0.797524	-1.09282	-0.872281	-0.818955
179	0.973551	1.19014	0.446034		-1.01474	-1.05096	-0.649364		-0.972801	-1.04746	-0.589521	-0.992948	-1.03178	-0.659416
180	1.15283	0.474583	1.33852		-1.05149	-0.681053	-1.10432		-1.01593	-0.638278	-1.12019	-1.03519	-0.693485	-1.08516
181	0.375006	1.29684	0.457632		-0.805722	-1.11784	-0.889227		-0.769462	-1.13321	-0.86053	-0.787742	-1.08976	-0.880157
182	0.670722	1.22933	0.827421		-0.88407	-1.08229	-0.971489		-0.857836	-1.05271	-0.950718	-0.8603	-1.06738	-0.951593
183	1.34494	0.510218	0.598502		-1.1094	-0.843252	-0.905908		-1.15696	-0.829999	-0.88983	-1.08776	-0.840544	-0.902593
184	1.36111	0.940303	0.35481		-1.05043	-0.99964	-0.540555		-1.04901	-0.985187	-0.476206	-1.04538	-0.984051	-0.560163
185	0.652448	0.764576	1.20922		-0.907178	-0.978192	-1.13445		-0.854549	-0.93252	-1.10716	-0.872607	-0.973157	-1.09624
186	0.93421	1.38308	0.523182		-0.991788	-1.06962	-0.700447		-0.989321	-1.0749	-0.630013	-0.976539	-1.05703	-0.718542
187	0.485501	1.06462	0.345132		-0.937612	-1.09789	-0.741667		-0.907217	-1.10497	-0.738725	-0.928737	-1.07286	-0.704939
188	1.08993	1.1857	1.01807		-0.994731	-1.0227	-0.962614		-0.956167	-1.0344	-0.9405	-0.975671	-0.997708	-0.944094
189	0.757103	0.608356	1.12415		-0.992204	-0.895635	-1.12724		-0.925737	-0.864219	-1.12904	-0.978289	-0.879187	-1.09439
190	1.24025	0.562954	0.740546		-1.0953	-0.845331	-0.964928		-1.13556	-0.825228	-0.952591	-1.07738	-0.836908	-0.949407
191	1.12096	1.24446	0.535123		-1.02402	-1.04449	-0.685796		-1.02547	-1.04208	-0.587288	-1.00722	-1.03245	-0.720386
192	0.557071	0.422601	1.3361		-0.959134	-0.821359	-1.191		-0.897367	-0.775718	-1.19729	-0.938419	-0.79641	-1.14394
193	1.02835	0.223636	0.334308		-1.11643	-0.729951	-0.921631		-1.11695	-0.70893	-0.915351	-1.09109	-0.693278	-0.89414
194	1.03679	1.33652	0.875436		-0.981058	-1.05541	-0.894883		-1.01587	-1.10308	-0.897331	-0.95788	-1.03237	-0.892396
195	0.337765	1.14046	1.26563		-0.556866	-1.04368	-1.084		-0.459993	-1.07308	-1.10995	-0.595345	-1.03177	-1.07434
196	0.433003	0.395114	1.41921		-0.904834	-0.857224	-1.213		-0.807254	-0.76566	-1.17439	-0.901226	-0.848082	-1.17805
197	0.876078	1.25002	1.12874		-0.918062	-1.04799	-1.02279		-0.919598	-1.07217	-1.02689	-0.912613	-1.03214	-0.99711
198	1.13039	0.568238	0.505271		-1.09665	-0.921332	-0.844011		-1.11839	-0.882067	-0.823546	-1.07616	-0.917508	-0.827491
199	1.25486	0.394998	0.363413		-1.11645	-0.869856	-0.800904		-1.14471	-0.845349	-0.765452	-1.08577	-0.861952	-0.803229
200	0.747406	0.895456	1.24055		-0.916236	-0.99375	-1.11056		-0.849826	-0.904523	-1.08808	-0.893104	-0.979721	-1.07315
201	1.19106	0.950613	0.340164		-1.04218	-1.01061	-0.542962		-1.03575	-0.988043	-0.460852	-1.03208	-1.00098	-0.575363
202	1.12969	0.992923	0.738588		-1.04249	-1.0063	-0.868099		-1.0145	-0.952797	-0.82678	-1.01929	-0.982222	-0.833312
203	1.26238	0.420977	0.161414		-1.06359	-0.956791	-0.468758		-1.06352	-0.937637	-0.463466	-1.04936	-0.944456	-0.448031
204	1.13833	1.28544	0.686216		-1.01758	-1.04656	-0.782399		-1.08845	-1.05366	-0.747624	-0.997646	-1.01421	-0.747762
205	0.70222	1.21726	0.726189		-0.91846	-1.08338	-0.920792		-0.905232	-1.12167	-0.881934	-0.904789	-1.05874	-0.901543
206	1.31728	0.763928	0.655562		-1.08629	-0.942599	-0.851791		-1.14976	-0.977219	-0.839545	-1.06226	-0.932723	-0.845151
207	0.496703	0.460081	1.01984		-0.9403	-0.903772	-1.16968		-0.885219	-0.839491	-1.15215	-0.915018	-0.881676	-1.14046
208	0.287869	1.25049	0.152854		-0.925226	-1.0926	-0.567244		-0.88532	-1.08001	-0.540366	-0.908269	-1.06661	-0.53537
209	0.298306	1.14841	0.35181		-0.803729	-1.12073	-0.868896		-0.803239	-1.14806	-0.862396	-0.806749	-1.10506	-0.862123
210	0.338017	1.13712	1.37165		-0.544046	-1.03755	-1.08874		-0.508152	-1.00874	-1.09444	-0.540886	-1.02902	-1.07561
211	1.37066	0.327332	0.872433		-1.07506	-0.589487	-1.03134		-1.08311	-0.532283	-1.0559	-1.06492	-0.603249	-1.00929
212	1.2316	0.462752	0.487922		-1.11138	-0.862165	-0.868759		-1.16843	-0.863466	-0.883947	-1.091	-0.850739	-0.871197
213	0.894876	0.713232	1.2509		-0.998771	-0.900571	-1.11626		-1.02064	-0.919582	-1.13085	-0.984837	-0.879774	-1.09237
214	0.880555	0.493905	1.17114		-1.03425	-0.781878	-1.12391		-0.998695	-0.766288	-1.12081	-1.01646	-0.763607	-1.10258
215	0.74448	1.03926	1.27705		-0.882456	-1.02197	-1.09818		-0.917971	-1.10245	-1.17483	-0.881154	-1.00182	-1.07199
216	0.296747	1.17013	0.255666		-0.866071	-1.11886	-0.758481		-0.805177	-1.11732	-0.74001	-0.861563	-1.09744	-0.745457
217	0.279284	0.324775	1.28514		-0.825031	-0.905501	-1.22214		-0.733559	-0.772192	-1.15113	-0.801875	-0.899881	-1.1887
218	1.25604	0.565671	0.653583		-1.10032	-0.867584	-0.922898		-1.15602	-0.882414	-0.922498	-1.07913	-0.85985	-0.91179
219	1.1266	1.30604	0.289575		-1.00629	-1.02151	-0.432079		-0.983684	-1.01504	-0.367738	-0.998642	-1.01764	-0.452774
220	0.571165	0.750631	1.16286		-0.872107	-0.995124	-1.138		-0.848078	-0.986659	-1.1233	-0.819868	-0.988462	-1.07896
221	1.4423	0.614445	0.833379		-1.09835	-0.830296	-0.965434		-1.13618	-0.818473	-0.932359	-1.07971	-0.821636	-0.9561
222	0.300483	1.32699	0.256122		-0.86156	-1.11984	-0.74677		-0.843452	-1.1219	-0.702823	-0.854097	-1.09638	-0.749124
223	0.306525	1.40494	0.317498		-0.82031	-1.12381	-0.813366		-0.781247	-1.11593	-0.757851	-0.807147	-1.10062	-0.806285
224	0.396954	1.13041	0.503726		-0.818158	-1.11068	-0.921685		-0.794531	-1.10046	-0.892479	-0.791911	-1.09373	-0.901192
225	1.25666	1.11861	0.470482		-1.04277	-1.0226	-0.629478		-1.03545	-1.01448	-0.552068	-1.03617	-1.01409	-0.650767
226	0.292491	0.246594	1.14396		-0.909924	-0.819273	-1.2214		-1.02069	-0.862694	-1.33109	-0.908959	-0.824008	-1.20549
227	0.432239	0.230429	1.17114		-0.988061	-0.675306	-1.18006		-0.955774	-0.695847	-1.19835	-0.966693	-0.66271	-1.15042
228	1.1544	0.302999	0.274384		-1.11966	-0.859307	-0.779342		-1.10843	-0.835979	-0.743972	-1.09841	-0.839317	-0.75469
229	0.471966	0.52947	1.20897		-0.8809	-0.937408	-1.18404		-0.874553	-0.945061	-1.22658	-0.864684	-0.920786	-1.15873
230	0.493035	1.18437	1.08254		-0.730012	-1.06997	-1.07162		-0.719813	-1.10005	-1.04567	-0.733949	-1.0488	-1.05378
231	1.19499	0.543995	0.698061		-1.0961	-0.850314	-0.957817		-1.11196	-0.799478	-0.909347	-1.07017	-0.817604	-0.934047
232	1.14684	1.26763	0.538467		-1.02452	-1.04388	-0.679566		-1.02956	-1.0542	-0.605932	-1.01064	-1.02674	-0.701307
233	1.24824	1.26162	0.833106		-1.02607	-1.02894	-0.847551		-0.972271	-0.983941	-0.816662	-1.0015	-1.0151	-0.832581
234	0.702431	1.19804	0.807434		-0.905785	-1.0779	-0.959601		-0.874875	-1.0938	-0.943603	-0.878096	-1.06361	-0.931177
235	0.744446	1.03927	1.27706		-0.882439	-1.02197	-1.09819		-0.917952	-1.10242	-1.17503	-0.881074	-1.00177	-1.07212
236	0.657573	0.494683	1.12327		-0.987887	-0.856041	-1.15353		-0.953207	-0.816677	-1.13279	-0.970047	-0.838038	-1.13439
237	0.279281	0.324785	1.28508		-0.825022	-0.905514	-1.22214		-0.733324	-0.771692	-1.15091	-0.801736	-0.899777	-1.18857
238	1.25556	0.565714	0.653557		-1.10029	-0.867663	-0.922921		-1.15602	-0.882469	-0.922536	-1.0791	-0.85986	-0.911817
239	0.444615	0.987518	1.33282		-0.692094	-1.03987	-1.12296		-0.654733	-1.04275	-1.17698	-0.707246	-1.00889	-1.10471
240	1.07089	0.26229	1.27917		-1.02576	-0.472865	-1.07044		-1.02806	-0.40651	-1.09611	-1.02223	-0.517291	-1.06086
241	0.772609	1.19718	0.641785		-0.95916	-1.077	-0.856409		-0.932136	-1.08046	-0.832279	-0.937788	-1.06014	-0.838951
242	1.09867	0.871733	1.32164		-1.01283	-0.918261	-1.08389		-0.949747	-0.880095	-1.04947	-0.995032	-0.893155	-1.0535
243	0.432045	1.42349	0.280898		-0.917426	-1.10401	-0.66374		-0.867424	-1.10225	-0.654697	-0.909992	-1.08595	-0.654376
244	0.364802	1.36143	0.46317		-0.78946	-1.11866	-0.894211		-0.740794	-1.11629	-0.827764	-0.777527	-1.09481	-0.895815
245	0.844651	0.787096	1.34121		-0.964667	-0.933437	-1.12813		-0.917052	-0.890915	-1.134	-0.952153	-0.918814	-1.09556
246	0.361198	1.18038	1.11613		-0.599863	-1.05816	-1.07424		-0.531228	-1.07412	-1.11484	-0.616516	-1.04601	-1.05664
247	0.447977	0.402987	1.30841		-0.915835	-0.861635	-1.20564		-0.986656	-0.907995	-1.32274	-0.910562	-0.870885	-1.1728
248	0.284419	1.16104	0.330432		-0.802431	-1.12191	-0.85935		-0.78888	-1.13482	-0.845058	-0.786404	-1.10385	-0.848453
249	1.26358	0.456493	1.1067		-1.07103	-0.682108	-1.06807		-1.12976	-0.63657	-1.09251	-1.05029	-0.698019	-1.04821
250	0.37748	1.19495	0.260133		-0.913003	-1.10654	-0.690072		-0.87247	-1.1053	-0.673605	-0.899638	-1.08757	-0.675693
251	0.970767	1.0788	0.386627		-1.02301	-1.04042	-0.608711		-0.966681	-1.03613	-0.571221	-0.989769	-1.0293	-0.57714
252	0.506556	1.15726	0.442646		-0.908501	-1.10425	-0.81844		-0.885744	-1.13816	-0.787524	-0.897635	-1.08247	-0.811559
253	0.38241	1.15941	0.376398		-0.861758	-1.11591	-0.83013		-0.787265	-1.10998	-0.769904	-0.845694	-1.0934	-0.827352
254	1.26225	0.883762	1.19984		-1.04449	-0.910762	-1.03758		-1.07311	-0.908625	-1.06056	-1.02646	-0.889627	-1.02239
255	1.05204	1.18105	0.438545		-1.0226	-1.04245	-0.625846		-1.04043	-1.06687	-0.587016	-1.00291	-1.01719	-0.623689
256	0.85359	1.32298	0.970164		-0.921856	-1.06716	-0.970824		-0.908024	-1.0886	-0.964918	-0.901896	-1.05182	-0.950522
257	0.105438	0.235003	1.15738		-0.571222	-0.974621	-1.17025		-0.569687	-0.928869	-1.15311	-0.549379	-0.967047	-1.15719
258	0.509424	1.02571	0.52933		-0.8977	-1.09595	-0.900075		-0.916606	-1.09278	-0.904306	-0.871298	-1.06804	-0.896304
259	0.368507	1.42874	0.441545		-0.799543	-1.1206	-0.873238		-0.782483	-1.1357	-0.839761	-0.784666	-1.09864	-0.869284
260	0.307756	0.247708	1.15488		-0.920839	-0.806037	-1.21873		-0.825691	-0.758393	-1.17794	-0.913889	-0.794526	-1.1951
261	0.550943	1.56782	0.489584		-0.884969	-1.11288	-0.799078		-0.810832	-1.10381	-0.767611	-0.88048	-1.09199	-0.780205
262	1.3226	0.466026	1.02012		-1.08005	-0.698935	-1.04945		-1.11805	-0.664941	-1.00386	-1.06573	-0.695247	-1.03348
263	1.17602	0.296276	0.362274		-1.1207	-0.792887	-0.877485		-1.1095	-0.759453	-0.805014	-1.10035	-0.781459	-0.86748
264	1.12702	0.962925	0.286999		-1.03011	-1.01119	-0.483964		-1.03188	-1.03348	-0.462758	-1.01799	-0.995358	-0.474538
265	0.269666	0.334693	1.33411		-0.802489	-0.917626	-1.22103		-0.736984	-0.791441	-1.15785	-0.788755	-0.91527	-1.19145
266	1.19344	0.256532	0.326216		-1.12211	-0.770914	-0.876958		-1.11037	-0.733999	-0.841372	-1.09745	-0.749818	-0.84977
267	1.18834	0.555705	0.441569		-1.0997	-0.927621	-0.789842		-1.11447	-0.894866	-0.742398	-1.07486	-0.9307	-0.790333
268	0.409728	0.330073	1.29705		-0.930556	-0.8183	-1.21069		-0.850093	-0.752867	-1.16247	-0.917694	-0.791597	-1.18577
269	0.21256	0.202507	0.913344		-0.878958	-0.853186	-1.22563		-0.7991	-0.757708	-1.17229	-0.86281	-0.816592	-1.16395
270	0.306705	1.02842	1.1747		-0.554506	-1.04185	-1.08614		-0.493542	-1.05793	-1.10793	-0.571084	-1.03339	-1.06753
271	0.952284	1.07652	0.505662		-1.02089	-1.04712	-0.727875		-0.985199	-1.03332	-0.66461	-0.995211	-1.0304	-0.72958
272	0.455933	1.33723	0.404726		-0.88252	-1.11373	-0.795535		-0.800476	-1.10929	-0.759831	-0.872903	-1.09192	-0.786371
273	0.184102	1.31774	1.04161		-0.355129	-1.00707	-1.01229		-0.332857	-1.01063	-0.977855	-0.363673	-1.00145	-1.00662
274	0.458569	0.938934	1.18527		-0.735607	-1.04366	-1.11711		-0.730492	-1.05588	-1.14719	-0.727847	-1.03007	-1.09057
275	0.241892	0.292687	1.24517		-0.80741	-0.909657	-1.22399		-0.808417	-0.928368	-1.25215	-0.799464	-0.902542	-1.20858
276	1.18345	1.03691	0.245064		-1.01633	-1.00372	-0.405869		-1.03785	-1.00862	-0.377452	-1.01178	-0.981542	-0.435005
277	0.426576	1.17789	0.39535		-0.880818	-1.11252	-0.818076		-0.862698	-1.12937	-0.80404	-0.865074	-1.09195	-0.799513
278	1.15006	0.275878	0.150078		-1.09425	-0.924568	-0.578514		-1.09517	-0.89467	-0.576285	-1.07254	-0.925618	-0.537138
279	0.41094	1.26502	0.324859		-0.896574	-1.11187	-0.746443		-0.838343	-1.11328	-0.715329	-0.892498	-1.09092	-0.73576
280	1.14826	1.3035	0.2271		-0.995751	-1.0057	-0.350342		-0.978027	-0.9933	-0.291899	-0.994586	-1.00644	-0.388346
281	0.415018	1.12382	0.924693		-0.703724	-1.07631	-1.05827		-0.65794	-1.12513	-1.08542	-0.709926	-1.05489	-1.03523
282	0.38898	0.274611	1.34655		-0.94636	-0.764444	-1.21033		-0.881172	-0.700019	-1.18286	-0.941216	-0.742369	-1.1766
283	1.10791	0.808128	0.692508		-1.06291	-0.971716	-0.889644		-1.05103	-0.922598	-0.849794	-1.03566	-0.951104	-0.875619
284	0.343923	0.298544	1.3158		-0.905367	-0.830389	-1.22088		-0.916141	-0.831654	-1.26453	-0.905159	-0.825831	-1.18908
285	0.978606	1.23485	0.350184		-1.01005	-1.04244	-0.541768		-0.987234	-1.04454	-0.477838	-0.993889	-1.03362	-0.546616
286	1.21877	1.29982	0.777312		-1.02186	-1.0383	-0.817761		-1.02238	-1.00822	-0.755169	-1.00195	-1.02291	-0.822747
287	0.37136	1.15662	0.551468		-0.772594	-1.10816	-0.956289		-0.75993	-1.11778	-0.899061	-0.757159	-1.08639	-0.952137
288	1.27416	0.970495	0.805528		-1.05841	-0.980189	-0.884928		-1.05379	-0.966046	-0.871589	-1.04301	-0.969205	-0.867054
289	0.225917	1.04067	0.165629		-0.884654	-1.11403	-0.687706		-0.922262	-1.13205	-0.679062	-0.88255	-1.09203	-0.656555
290	1.05536	0.494105	0.36061		-1.09762	-0.937313	-0.75575		-1.11738	-0.913208	-0.740776	-1.07203	-0.902856	-0.73486
291	1.00846	0.815997	1.29636		-1.00457	-0.915925	-1.09724		-1.01509	-0.882254	-1.08828	-0.992435	-0.883293	-1.07491
292	0.334238	0.387623	1.27881		-0.838179	-0.915641	-1.2136		-0.777953	-0.807343	-1.15619	-0.827119	-0.90395	-1.18905
293	0.665455	1.24586	0.567632		-0.933531	-1.09253	-0.8368		-0.878673	-1.10872	-0.805334	-0.915817	-1.07066	-0.822426
294	1.16227	0.286282	0.197789		-1.10988	-0.898976	-0.6724		-1.09538	-0.863056	-0.623672	-1.08295	-0.861109	-0.638856
295	1.16954	0.921869	0.134648		-0.988286	-0.975597	-0.257152		-0.983949	-0.969514	-0.207512	-0.989969	-0.979388	-0.287625
296	1.09686	0.295438	0.354908		-1.11978	-0.802736	-0.877767		-1.1339	-0.76025	-0.86026	-1.09797	-0.797912	-0.863511
297	0.115206	1.28844	1.03108		-0.238388	-0.964584	-0.972092		-0.16508	-0.943522	-0.953085	-0.269385	-0.97338	-0.977921
298	1.26407	1.14928	0.542855		-1.04357	-1.02498	-0.683138		-1.07592	-1.02453	-0.64704	-1.0211	-1.014	-0.689661
299	0.386569	0.903796	0.520139		-0.832314	-1.0984	-0.963658		-0.827898	-1.09331	-0.936863	-0.815943	-1.07751	-0.952598
300	0.588965	1.17679	0.915107		-0.830449	-1.07839	-1.02466		-0.822259	-1.1088	-1.05556	-0.774286	-1.03007	-0.990929
301	1.34902	0.993951	0.859932		-1.06135	-0.972129	-0.895103		-1.10342	-0.999288	-0.892524	-1.03195	-0.950995	-0.865802
302	1.45286	1.16625	0.356177		-1.03338	-1.00715	-0.482847		-1.02666	-0.981094	-0.399489	-1.03068	-0.999463	-0.524867
303	0.942061	1.23329	0.244848		-0.998248	-1.0246	-0.417833		-0.96788	-1.0212	-0.386647	-0.988017	-1.01533	-0.408273
304	1.26963	1.22728	0.771359		-1.03454	-1.02585	-0.81788		-1.04148	-1.0427	-0.793279	-1.01986	-1.0092	-0.820339
305	0.459775	0.342662	1.1812		-0.956701	-0.808413	-1.19612		-0.886162	-0.757803	-1.18813	-0.943048	-0.800171	-1.16042
306	1.18685	0.347594	0.385041		-1.11895	-0.827925	-0.859294		-1.1502	-0.821436	-0.849462	-1.10132	-0.829636	-0.851824
307	1.52352	0.475032	0.522773		-1.11739	-0.835065	-0.863177		-1.12602	-0.771381	-0.80452	-1.08677	-0.825279	-0.859049
308	1.23275	0.310047	0.501891		-1.11036	-0.723166	-0.953036		-1.12612	-0.686862	-0.945273	-1.08936	-0.71644	-0.934551
309	0.577403	1.14479	1.29395		-0.766817	-1.0514	-1.10098		-0.734598	-1.11153	-1.1551	-0.784678	-1.03569	-1.08188
310	1.37111	0.41675	1.00315		-1.0785	-0.651917	-1.04565		-1.1202	-0.581467	-1.0925	-1.06449	-0.684416	-1.02397
311	0.681012	1.35887	0.530096		-0.937081	-1.09568	-0.791153		-0.93739	-1.13944	-0.753724	-0.924063	-1.06984	-0.795016
312	1.28391	0.806278	0.414078		-1.07049	-0.988096	-0.651912		-1.08864	-0.930931	-0.654821	-1.04605	-0.978637	-0.635279
313	1.17092	0.44438	1.38058		-1.04907	-0.645404	-1.10307		-1.02319	-0.594123	-1.09997	-1.03418	-0.665744	-1.09613
314	0.269952	1.33048	0.258044		-0.833432	-1.12361	-0.781273		-0.798422	-1.11299	-0.735559	-0.833309	-1.102	-0.779438
315	1.08331	0.241506	1.25053		-1.02102	-0.444637	-1.06011		-1.0342	-0.361876	-1.06153	-1.02053	-0.485883	-1.05536
316	0.271123	0.203705	1.09589		-0.929106	-0.777205	-1.21891		-0.86364	-0.765033	-1.19524	-0.924332	-0.743179	-1.19251
317	0.403111	1.37309	0.135509		-0.955098	-1.05271	-0.416113		-0.958563	-1.04986	-0.373291	-0.944779	-1.04429	-0.42771
318	1.25662	0.719941	0.654287		-1.08675	-0.93435	-0.872036		-1.14727	-0.926895	-0.857874	-1.05903	-0.926461	-0.86297
319	0.67911	0.500653	1.44024		-0.972466	-0.823816	-1.17972		-0.975192	-0.824836	-1.23464	-0.961063	-0.822446	-1.14902
320	0.341872	1.10962	0.373798		-0.835182	-1.11773	-0.859863		-0.786637	-1.11626	-0.802456	-0.818768	-1.10095	-0.846397
321	0.868952	1.32126	0.383202		-0.995416	-1.06096	-0.595821		-0.931788	-1.05943	-0.549764	-0.970338	-1.04832	-0.603603
322	1.31657	0.438213	0.404546		-1.11506	-0.873944	-0.807658		-1.12894	-0.827254	-0.786825	-1.08943	-0.865574	-0.785711
323	1.34646	0.20935	1.02537		-1.02073	-0.395226	-1.02125		-1.02242	-0.347581	-0.987155	-1.01841	-0.423366	-1.009
324	0.430312	1.3827	1.26893		-0.612638	-1.06144	-1.07206		-0.538766	-1.09411	-1.09761	-0.648332	-1.05161	-1.05611
325	0.225856	0.246822	1.2957		-0.830355	-0.878841	-1.23186		-0.862961	-0.93057	-1.29498	-0.834328	-0.878463	-1.2181
326	1.33208	0.747249	0.921184		-1.0795	-0.888493	-0.975412		-1.1097	-0.875027	-0.970303	-1.05915	-0.873707	-0.952197
327	0.29986	1.18231	0.315743		-0.826859	-1.12189	-0.829872		-0.790162	-1.12208	-0.810134	-0.802974	-1.10291	-0.818549
328	0.840238	0.224702	1.05804		-1.02806	-0.49694	-1.08073		-0.98646	-0.460868	-1.0967	-1.00691	-0.47111	-1.05055
329	0.583053	1.21376	0.658227		-0.880115	-1.09645	-0.924074		-0.84679	-1.10838	-0.916514	-0.849519	-1.07753	-0.888098
330	1.20698	0.205841	0.288305		-1.12109	-0.729968	-0.888897		-1.11302	-0.705542	-0.83614	-1.10511	-0.707187	-0.879337
331	0.725426	1.11953	0.61332		-0.957882	-1.07636	-0.864036		-0.927803	-1.1283	-0.846693	-0.94528	-1.05048	-0.852862
332	0.286245	0.323366	1.13081		-0.842635	-0.906837	-1.21675		-0.867925	-0.964152	-1.30025	-0.841586	-0.902832	-1.19951
333	1.10138	0.248483	0.38942		-1.11374	-0.72072	-0.93605		-1.11665	-0.692721	-0.906018	-1.08834	-0.686364	-0.935199
334	0.474756	1.06939	0.619552		-0.843527	-1.09716	-0.959533		-0.821036	-1.10305	-0.934764	-0.827761	-1.07708	-0.945233
335	0.81494	0.194355	0.949146		-1.02558	-0.467117	-1.06712		-1.04582	-0.396344	-1.08071	-1.0147	-0.481789	-1.0615
336	1.19623	0.254684	0.21441		-1.12003	-0.860728	-0.738355		-1.10691	-0.821038	-0.707074	-1.10125	-0.839248	-0.723918
337	0.327176	0.400156	1.23653		-0.825162	-0.929584	-1.20951		-0.824531	-0.932014	-1.23649	-0.808151	-0.92402	-1.18481
338	1.23767	0.512877	0.794112		-1.09366	-0.799772	-0.998005		-1.05413	-0.761645	-0.946488	-1.06651	-0.745966	-0.954501
339	0.648969	0.502707	1.07966		-0.986553	-0.869368	-1.1485		-0.932073	-0.826806	-1.13387	-0.966604	-0.839667	-1.11238
340	0.169932	1.10791	0.966282		-0.366734	-1.00845	-1.02065		-0.372942	-1.02284	-0.950558	-0.377314	-0.997609	-1.0174
341	0.341945	1.17118	1.31866		-0.548765	-1.04174	-1.08376		-0.501645	-1.06613	-1.10054	-0.56986	-1.03345	-1.07999
342	0.347022	0.977505	1.19162		-0.612569	-1.04465	-1.10232		-0.573551	-1.08552	-1.15337	-0.625306	-1.03129	-1.08331
343	0.153327	0.972743	0.265379		-0.664068	-1.11072	-0.93326		-0.640573	-1.10186	-0.891912	-0.648503	-1.09528	-0.915995
344	1.30196	0.366802	0.40441		-1.11986	-0.825524	-0.854152		-1.1189	-0.780965	-0.806628	-1.10031	-0.81597	-0.85965
345	1.2229	0.337507	0.290505		-1.11763	-0.87169	-0.764573		-1.09534	-0.848622	-0.683783	-1.09388	-0.825635	-0.743943
346	0.298358	0.335449	1.19432		-0.842957	-0.904768	-1.21765		-0.790438	-0.846834	-1.19715	-0.837945	-0.892551	-1.18642
347	0.353846	1.27513	0.387047		-0.825862	-1.12018	-0.850207		-0.771555	-1.11596	-0.811477	-0.806962	-1.10362	-0.847474
348	1.12381	1.15705	0.92318		-1.01196	-1.02104	-0.925758		-0.941312	-0.947207	-0.882089	-0.995147	-0.989566	-0.891887
349	1.33856	1.31883	1.07697		-1.01878	-1.01414	-0.926197		-1.06974	-1.09039	-0.943171	-0.995751	-0.996519	-0.896156
350	0.977718	1.16022	1.28597		-0.946138	-1.01286	-1.05599		-0.937289	-0.997212	-0.964143	-0.974088	-0.986847	-0.993738
351	1.09835	0.514149	0.636763		-1.09542	-0.860694	-0.950654		-1.09908	-0.82926	-0.903969	-1.07436	-0.829424	-0.937021
352	1.04339	0.447936	1.28857		-1.04691	-0.687428	-1.11219		-1.04943	-0.645491	-1.14504	-1.01877	-0.684233	-1.0946
353	1.03202	0.297351	1.29825		-1.03275	-0.525314	-1.08789		-1.02823	-0.474369	-1.09733	-1.02338	-0.544152	-1.07697
354	1.26022	0.51854	0.560246		-1.10694	-0.868051	-0.888311		-1.12725	-0.804057	-0.814228	-1.07843	-0.862062	-0.878283
355	1.1834	0.996282	1.13379		-1.02496	-0.962599	-1.01367		-1.08382	-1.00876	-1.04603	-1.01049	-0.950275	-0.991861
356	0.238951	1.11719	0.227581		-0.83698	-1.12308	-0.783196		-0.804496	-1.11246	-0.735681	-0.832801	-1.10842	-0.769828
357	0.263445	0.231744	1.29502		-0.890222	-0.820901	-1.22968		-0.7826	-0.715536	-1.15526	-0.879746	-0.806231	-1.19947
358	1.03755	1.02466	0.137437		-0.98336	-0.982641	-0.261264		-0.981146	-0.994676	-0.263138	-0.978887	-0.96594	-0.25542
359	0.296341	0.409644	1.25249		-0.782464	-0.949781	-1.20585		-0.754924	-0.884088	-1.18484	-0.758279	-0.940714	-1.16431
360	0.246522	1.03652	1.38928		-0.445315	-1.01559	-1.06953		-0.390897	-0.988967	-1.07753	-0.474994	-1.0114	-1.06334
361	0.922355	0.26053	1.24694		-1.02648	-0.506768	-1.08852		-1.01508	-0.471928	-1.12425	-1.00435	-0.502029	-1.061
362	0.439822	0.320362	1.20784		-0.955442	-0.794064	-1.20006		-0.945619	-0.79749	-1.21902	-0.950265	-0.77683	-1.16831
363	1.27691	0.727752	1.22474		-1.05871	-0.840535	-1.06239		-1.11751	-0.838481	-1.11276	-1.04305	-0.848124	-1.04293
364	0.389002	0.506803	1.25406		-0.822405	-0.955154	-1.19361		-0.844945	-1.02148	-1.23161	-0.786198	-0.949902	-1.15907
365	0.426823	1.10183	0.464305		-0.859805	-1.10972	-0.883224		-0.848543	-1.134	-0.884049	-0.8501	-1.0928	-0.867349
366	1.04612	1.23617	0.296237		-1.00866	-1.02753	-0.463509		-0.996784	-1.04449	-0.395381	-1.00168	-1.01844	-0.482028
367	1.20501	0.404176	0.3003		-1.10887	-0.907513	-0.725167		-1.10233	-0.838246	-0.683557	-1.08532	-0.890466	-0.715234
368	0.954344	0.657731	1.3469		-1.01395	-0.849965	-1.12718		-0.970281	-0.817048	-1.08554	-1.00281	-0.812412	-1.08452
369	1.18554	0.485777	1.03903		-1.07308	-0.732112	-1.06514		-1.11246	-0.681682	-1.04448	-1.05183	-0.718279	-1.03535
370	1.21261	0.367195	0.560672		-1.10882	-0.758917	-0.957127		-1.11293	-0.74175	-0.926944	-1.0914	-0.734755	-0.938032
371	0.531454	1.48741	0.47775		-0.884583	-1.11255	-0.805202		-0.833568	-1.13215	-0.763039	-0.878587	-1.08536	-0.806456
372	0.234187	0.276624	1.33063		-0.809109	-0.899332	-1.22828		-0.761573	-0.836876	-1.19634	-0.804552	-0.894648	-1.20608
373	1.30494	0.840142	0.937027		-1.06836	-0.924083	-0.964207		-1.11322	-0.885593	-0.908009	-1.04117	-0.901978	-0.937992
374	0.26814	1.23787	0.255497		-0.837607	-1.12297	-0.784144		-0.823284	-1.13293	-0.762073	-0.823994	-1.10507	-0.784677
375	0.251837	1.37311	0.317862		-0.762211	-1.12365	-0.864567		-0.712041	-1.1047	-0.794501	-0.757755	-1.09878	-0.865775
376	0.358771	0.304652	1.03141		-0.927716	-0.843977	-1.20508		-0.987371	-0.874539	-1.26416	-0.908052	-0.846988	-1.18029
377	0.261253	0.310687	1.02925		-0.829413	-0.920114	-1.21368		-0.810722	-0.919419	-1.24306	-0.813526	-0.918931	-1.17323
378	0.475902	1.25992	0.376211		-0.908468	-1.10794	-0.761794		-0.858898	-1.1136	-0.703707	-0.897127	-1.07773	-0.751395
379	1.01739	0.216412	0.337451		-1.1147	-0.716755	-0.930222		-1.10404	-0.671291	-0.878628	-1.09031	-0.698597	-0.902259
380	0.402954	0.559428	1.41931		-0.797092	-0.962324	-1.19447		-0.744527	-0.904825	-1.18599	-0.778582	-0.958414	-1.15918
381	0.556741	0.423159	1.20826		-0.966549	-0.832251	-1.18193		-0.958562	-0.80489	-1.22128	-0.957966	-0.821052	-1.14525
382	0.949613	0.219978	0.421985		-1.10123	-0.669517	-0.980979		-1.09695	-0.668449	-0.928397	-1.08506	-0.668622	-0.969897
383	0.761936	0.712456	1.1824		-0.96646	-0.937001	-1.12337		-0.888206	-0.875109	-1.09999	-0.95261	-0.924471	-1.09142
384	1.34556	0.258763	0.285134		-1.12507	-0.798853	-0.825811		-1.14423	-0.794366	-0.824054	-1.10955	-0.797752	-0.820635
385	1.3246	0.238082	0.981331		-1.03719	-0.44936	-1.03138		-1.04676	-0.433196	-0.963242	-1.03042	-0.479622	-1.01802
386	0.899491	1.52285	1.12601		-0.894221	-1.07301	-0.987977		-0.892998	-1.15822	-0.98956	-0.880503	-1.04562	-0.961772
387	0.981152	1.48865	0.701337		-0.974942	-1.07569	-0.799099		-1.02514	-1.128	-0.806429	-0.956245	-1.05344	-0.779207
388	1.39442	0.598809	1.14873		-1.0776	-0.762719	-1.05132		-1.14909	-0.734545	-1.07721	-1.05637	-0.778565	-1.0303
389	1.20735	1.2771	0.673996		-1.02693	-1.03983	-0.763012		-1.03896	-1.02741	-0.709604	-1.00101	-1.02855	-0.765851
390	1.26162	1.11993	1.3621		-1.00874	-0.963392	-1.04165		-1.03778	-0.991982	-1.06296	-0.994078	-0.955469	-1.01848
391	0.376844	1.03226	0.693478		-0.742734	-1.09053	-1.02181		-0.727793	-1.09574	-0.950671	-0.713012	-1.06674	-1.00369
392	0.370778	0.462346	1.14885		-0.83737	-0.948151	-1.19407		-0.829234	-0.89604	-1.20094	-0.836331	-0.941096	-1.16767
393	1.41764	0.609161	0.498414		-1.10413	-0.915597	-0.790455		-1.13671	-0.898019	-0.756345	-1.08301	-0.907364	-0.797501
394	1.32868	0.355898	0.968415		-1.07166	-0.602697	-1.04598		-1.10069	-0.545477	-1.06065	-1.06031	-0.634528	-1.03263
395	1.31301	0.993308	0.72802		-1.06207	-0.989161	-0.833844		-1.10773	-0.938419	-0.816605	-1.03785	-0.981509	-0.812802
396	0.372256	1.01243	0.304791		-0.901284	-1.10974	-0.772577		-0.878098	-1.13098	-0.762625	-0.893739	-1.08777	-0.753553
397	0.540635	1.10717	1.24266		-0.75531	-1.05281	-1.10054		-0.734488	-1.13264	-1.16915	-0.785731	-1.02597	-1.06991
398	0.370018	0.318352	0.952995		-0.933603	-0.857962	-1.1965		-0.892181	-0.863535	-1.19699	-0.912355	-0.820781	-1.17401
399	0.245467	0.265404	1.01698		-0.85062	-0.892184	-1.22105		-0.815511	-0.886373	-1.21018	-0.80866	-0.86077	-1.18801
400	0.841991	1.11702	1.32626		-0.903828	-1.01965	-1.08599		-0.890659	-0.987812	-1.05009	-0.883246	-1.00147	-1.06762
401	0.500305	0.391841	1.15637		-0.957297	-0.836314	-1.18781		-0.845794	-0.783856	-1.14765	-0.9439	-0.803599	-1.14877
402	1.26169	0.948612	0.747494		-1.06143	-0.98291	-0.862048		-1.09496	-0.975739	-0.87813	-1.04158	-0.952574	-0.831052
403	1.07938	0.800722	1.43613		-1.0115	-0.88341	-1.11187		-0.977333	-0.846655	-1.10651	-1.00836	-0.865603	-1.07828
404	0.509075	1.15454	0.395459		-0.924574	-1.10186	-0.773167		-0.917394	-1.12942	-0.762263	-0.912883	-1.08144	-0.764756
405	1.39535	0.440436	0.524432		-1.11598	-0.819866	-0.890181		-1.12901	-0.76203	-0.859655	-1.0927	-0.804906	-0.875474
406	0.987473	0.250027	1.09081		-1.03394	-0.497789	-1.07119		-1.01749	-0.442042	-1.08446	-1.01902	-0.497223	-1.04438
407	1.11289	0.513937	0.727537		-1.09062	-0.834296	-0.988556		-1.09136	-0.824706	-0.933235	-1.05393	-0.793807	-0.98811
408	0.204103	1.2142	1.37256		-0.355602	-0.998459	-1.02963		-0.302127	-0.983153	-1.02979	-0.404228	-0.9976	-1.02169
409	1.08675	0.60734	0.55927		-1.08867	-0.929597	-0.873185		-1.11926	-0.886531	-0.816598	-1.05908	-0.924367	-0.847055
410	1.34111	0.354611	0.803022		-1.08676	-0.644185	-1.02134		-1.0882	-0.611323	-0.985322	-1.06989	-0.643908	-0.994932
411	0.314202	0.385531	1.11008		-0.829762	-0.934861	-1.20509		-0.847101	-0.976117	-1.25406	-0.802263	-0.930055	-1.17836
412	0.627728	0.773232	1.33143		-0.880978	-0.977251	-1.15152		-0.847546	-0.944688	-1.17819	-0.869432	-0.956634	-1.11673
413	1.22653	0.825176	0.653272		-1.07349	-0.968826	-0.844302		-1.12116	-0.963268	-0.811435	-1.04666	-0.943306	-0.821674
414	1.14101	1.21415	0.607218		-1.02723	-1.04089	-0.741253		-1.0161	-1.02441	-0.721338	-1.01568	-1.02121	-0.733557
415	1.34304	0.406383	0.459796		-1.11793	-0.826492	-0.869418		-1.11364	-0.759082	-0.81523	-1.09807	-0.817138	-0.851854
416	0.295306	0.335445	1.26999		-0.835542	-0.903212	-1.22051		-0.824541	-0.884374	-1.24188	-0.833515	-0.893098	-1.19799
417	1.1433	0.506014	0.43496		-1.10357	-0.911944	-0.813488		-1.13299	-0.952853	-0.79034	-1.0787	-0.90626	-0.782056
418	1.05677	1.22703	1.24663		-0.962091	-1.01761	-1.02816		-0.91547	-0.953905	-0.999492	-0.946519	-1.00095	-1.0057
419	0.57067	0.412381	1.25324		-0.972338	-0.812821	-1.18295		-0.89853	-0.770118	-1.16202	-0.962902	-0.794952	-1.15263
420	1.28547	1.15137	0.987905		-1.03278	-0.998411	-0.927111		-0.9721	-0.94673	-0.904283	-1.01668	-0.982829	-0.892197
421	0.655793	1.05889	1.00814		-0.870636	-1.05411	-1.05252		-0.829242	-1.10584	-1.03233	-0.845579	-1.04518	-1.02154
422	1.06426	0.217115	1.26765		-1.01163	-0.409679	-1.05108		-1.01289	-0.309319	-1.04507	-1.01362	-0.460242	-1.04977
423	0.574555	1.13228	1.29408		-0.767297	-1.05035	-1.10261		-0.746103	-1.05103	-1.13371	-0.778169	-1.02922	-1.08129
424	1.26579	0.509385	0.39951		-1.10566	-0.915015	-0.765819		-1.11555	-0.869885	-0.729478	-1.08589	-0.904362	-0.757581
425	0.558971	0.41163	1.04564		-0.982768	-0.837593	-1.166		-0.936125	-0.793295	-1.17241	-0.972364	-0.821479	-1.13709
426	0.835705	1.30835	0.652712		-0.963827	-1.07845	-0.830053		-0.908282	-1.11072	-0.809582	-0.947668	-1.05697	-0.810902
427	0.354081	0.220835	0.968089		-0.974564	-0.736004	-1.19267		-0.995953	-0.728545	-1.21506	-0.966895	-0.716271	-1.1539
428	1.2912	0.499779	0.428312		-1.1091	-0.899259	-0.795917		-1.13199	-0.849919	-0.757121	-1.08102	-0.894493	-0.794347
429	0.997924	0.361948	0.274391		-1.10776	-0.910737	-0.740885		-1.11941	-0.91865	-0.718609	-1.0762	-0.912838	-0.690676
430	0.216224	1.17438	0.908411		-0.44882	-1.03568	-1.03422		-0.458957	-1.02582	-1.02568	-0.439619	-1.02485	-1.01199
431	1.2744	1.20956	1.46068		-0.994508	-0.974347	-1.04933		-0.991216	-0.969605	-1.04951	-0.979701	-0.953218	-1.01838
432	0.713938	1.39003	0.923642		-0.866932	-1.0859	-0.97731		-0.847465	-1.11131	-0.956868	-0.84694	-1.06256	-0.962917
433	0.164879	1.03831	0.826647		-0.393498	-1.019	-1.0233		-0.380832	-1.02458	-1.01525	-0.386494	-1.01142	-1.00654
434	0.237254	1.27719	0.311922		-0.752287	-1.12253	-0.876912		-0.723831	-1.10985	-0.828087	-0.730114	-1.09899	-0.854165
435	1.09361	0.358249	0.626022		-1.0987	-0.737715	-0.997739		-1.12668	-0.687242	-0.964617	-1.07724	-0.739504	-0.96866
436	0.49122	1.26042	0.533884		-0.860669	-1.10945	-0.883648		-0.862576	-1.14567	-0.891631	-0.85269	-1.0941	-0.87057
437	0.827076	1.19874	0.602826		-0.978699	-1.07159	-0.815051		-0.952648	-1.09542	-0.795233	-0.95316	-1.05128	-0.802061
438	0.844551	0.688886	1.26183		-0.98969	-0.899719	-1.12732		-0.966162	-0.880127	-1.11967	-0.971061	-0.882948	-1.09413
439	0.325319	1.18456	1.30288		-0.529199	-1.03977	-1.07781		-0.462868	-1.05752	-1.10275	-0.566188	-1.03825	-1.06354
440	0.253709	1.36985	1.24228		-0.420905	-1.02318	-1.0382		-0.35126	-1.02348	-1.02394	-0.458354	-1.02157	-1.03544
441	1.16519	0.274903	0.466769		-1.10877	-0.703932	-0.958074		-1.10651	-0.687085	-0.904013	-1.08898	-0.678436	-0.938262
442	1.11992	0.317672	0.401415		-1.11756	-0.796022	-0.898012		-1.11223	-0.745537	-0.830739	-1.089	-0.774243	-0.875892
443	0.456187	1.14803	1.06093		-0.709344	-1.06876	-1.07448		-0.657603	-1.11346	-1.11239	-0.733578	-1.05745	-1.05608
444	1.25329	1.0332	1.05502		-1.03648	-0.971118	-0.974885		-0.980122	-0.933441	-0.945278	-1.02288	-0.951915	-0.958916
445	1.26384	0.295167	1.50325		-1.02252	-0.456473	-1.06551		-1.02536	-0.359383	-1.06309	-1.01948	-0.4957	-1.06124
446	0.949332	0.531424	1.20387		-1.03814	-0.788496	-1.11679		-1.03387	-0.750809	-1.12513	-0.994178	-0.755153	-1.07669
447	1.16022	0.353471	0.416218		-1.11719	-0.818669	-0.883039		-1.11539	-0.751114	-0.845232	-1.09286	-0.792625	-0.857912
448	1.48996	0.539728	0.469643		-1.1116	-0.890973	-0.794338		-1.12314	-0.843032	-0.760274	-1.07776	-0.888191	-0.768362
449	0.427959	1.51993	1.04817		-0.635088	-1.07914	-1.0391		-0.573079	-1.11114	-1.05136	-0.666679	-1.06713	-1.02286
450	1.42559	1.17124	0.556946		-1.0517	-1.0149	-0.666024		-1.04694	-0.986664	-0.607901	-1.03482	-1.00446	-0.672977
451	1.01268	0.209115	0.458099		-1.09255	-0.620944	-0.9929		-1.08373	-0.608794	-0.964137	-1.06769	-0.559079	-0.963144
452	1.09934	0.220457	0.262711		-1.12404	-0.782354	-0.852911		-1.1007	-0.750376	-0.771661	-1.10842	-0.763952	-0.847547
453	1.39002	0.375433	0.512784		-1.11639	-0.77295	-0.916018		-1.13142	-0.759393	-0.920817	-1.0985	-0.771133	-0.900832
454	1.10009	0.517726	0.41598		-1.09958	-0.926933	-0.795112		-1.11262	-0.886017	-0.759083	-1.06665	-0.92176	-0.766796
455	1.13794	1.00932	1.28121		-1.00511	-0.958508	-1.05358		-0.993598	-0.934675	-1.03784	-0.98653	-0.942604	-1.04005
456	0.752871	0.61068	1.5614		-0.960932	-0.85971	-1.17616		-1.00659	-0.868408	-1.27398	-0.950771	-0.860328	-1.14121
457	0.334132	0.352705	1.19274		-0.866624	-0.894974	-1.21429		-0.82054	-0.828605	-1.18982	-0.8504	-0.892286	-1.18871
458	1.25912	0.853951	1.0799		-1.05425	-0.915187	-1.01224		-1.02706	-0.878487	-0.992416	-1.03326	-0.891615	-1.00252
459	0.641499	1.29604	0.834032		-0.86039	-1.08895	-0.973497		-0.842944	-1.10864	-0.946708	-0.843813	-1.06929	-0.958553
460	0.247383	0.226006	1.19303		-0.88274	-0.833995	-1.22955		-0.874931	-0.820988	-1.23518	-0.860534	-0.807175	-1.19016
461	1.40522	0.843691	0.61926		-1.0833	-0.962324	-0.794549		-1.09158	-0.939608	-0.726704	-1.06046	-0.93471	-0.775199
462	0.596474	1.12777	0.766714		-0.872554	-1.08344	-0.979623		-0.838171	-1.05827	-0.985702	-0.844772	-1.06756	-0.979169
463	0.37235	1.19728	1.02953		-0.625734	-1.06665	-1.06538		-0.561022	-1.12076	-1.11527	-0.657906	-1.04823	-1.05363
464	1.17181	1.04583	0.221601		-1.00963	-0.999884	-0.373272		-1.01625	-1.00003	-0.322807	-1.00688	-0.991718	-0.398598
465	0.419672	1.28014	1.12818		-0.64176	-1.0671	-1.06882		-0.625261	-1.10831	-1.05123	-0.644702	-1.05452	-1.05537
466	1.05237	0.512977	0.833531		-1.07811	-0.817668	-1.03207		-1.14519	-0.788253	-1.00033	-1.05173	-0.801902	-1.01655
467	1.24026	0.320264	0.387594		-1.12046	-0.79738	-0.876397		-1.10875	-0.763104	-0.802286	-1.09198	-0.771725	-0.864829
468	0.286519	0.242729	1.28595		-0.902143	-0.813034	-1.22632		-0.908159	-0.829547	-1.25222	-0.894295	-0.800021	-1.20727
469	0.304553	0.228983	1.1307		-0.933119	-0.782687	-1.21599		-0.937136	-0.772619	-1.24293	-0.937086	-0.766773	-1.17256
470	0.115386	1.27946	0.93338		-0.252434	-0.971384	-0.9749		-0.197568	-0.954178	-0.964884	-0.291927	-0.982105	-0.978136
471	0.998382	1.257	0.52899		-1.00979	-1.05663	-0.705875		-1.0194	-1.06982	-0.659451	-0.996905	-1.03296	-0.756399
472	1.29754	0.573869	0.747959		-1.0975	-0.843278	-0.958628		-1.12599	-0.818211	-0.93795	-1.0701	-0.826248	-0.949895
473	1.11612	1.30022	0.831356		-1.00335	-1.04579	-0.864118		-0.9648	-1.01107	-0.841288	-0.978432	-1.02771	-0.831256

## Sheet: Rut
		Aspect ratio				Analytical stress				FEM	CT		FEM	VA
	X	Y	Z		sxx	syy	szz		sxx	syy	szz	sxx	syy	szz
1	0.34546	1.33343	0.30978		-0.908532	-1.23262	-0.723358		-0.929427	-1.28647	-0.694377	-0.927858	-1.2238	-0.753527
2	0.445001	1.34259	0.375745		-0.944185	-1.22713	-0.719936		-0.918888	-1.25831	-0.690539	-0.957858	-1.21612	-0.748228
3	0.389465	0.507128	1.24996		-0.771709	-0.903999	-1.48832		-0.808665	-0.996432	-1.53367	-0.759157	-0.921626	-1.49316
4	0.572327	0.760422	1.33727		-0.807545	-0.941867	-1.35067		-0.817498	-0.953868	-1.38127	-0.807165	-0.951075	-1.34837
5	0.587736	1.15743	1.2996		-0.734569	-1.02334	-1.23957		-0.698723	-1.0928	-1.32526	-0.775333	-1.028	-1.23708
6	0.562672	1.04327	0.431365		-1.00974	-1.19016	-0.740266		-1.0161	-1.25855	-0.714277	-1.01739	-1.1848	-0.77701
7	0.469297	0.629633	1.03774		-0.813696	-0.950807	-1.32333		-0.76182	-0.894045	-1.34957	-0.82071	-0.957055	-1.3226
8	1.09293	0.379623	0.342347		-1.21079	-0.925722	-0.753655		-1.24106	-0.922569	-0.739405	-1.2227	-0.94024	-0.77183
9	0.323248	0.2797	1.44181		-0.839509	-0.762458	-1.66049		-0.849076	-0.697872	-1.70363	-0.838418	-0.78141	-1.64936
10	0.363608	1.36028	0.288697		-0.952878	-1.25392	-0.674807		-0.938651	-1.28149	-0.654434	-0.976131	-1.25415	-0.687848
11	1.56365	0.384879	0.282152		-1.2739	-0.977351	-0.63645		-1.3042	-0.997476	-0.613111	-1.26748	-0.984213	-0.663971
12	1.26443	0.516333	1.18191		-1.04605	-0.685324	-1.21297		-1.12014	-0.634572	-1.27069	-1.04995	-0.729511	-1.20696
13	1.07667	0.280091	1.16329		-1.01335	-0.483879	-1.38349		-0.998614	-0.420441	-1.42852	-1.02651	-0.533032	-1.36344
14	0.218572	0.255823	1.08225		-0.76146	-0.845238	-1.64827		-0.710881	-0.832142	-1.67834	-0.789047	-0.844159	-1.64455
15	1.03477	1.16401	0.487214		-1.16761	-1.19866	-0.61549		-1.19006	-1.18805	-0.562414	-1.1597	-1.20023	-0.653318
16	0.945242	1.24588	0.519351		-1.12279	-1.19852	-0.651065		-1.13722	-1.19768	-0.589102	-1.11999	-1.19641	-0.681751
17	0.273052	0.232534	1.15514		-0.845771	-0.760583	-1.64865		-0.742229	-0.695486	-1.66755	-0.843037	-0.760765	-1.62189
18	1.20581	0.289495	1.01955		-1.03138	-0.501274	-1.30969		-1.05056	-0.456197	-1.33947	-1.03393	-0.533398	-1.3168
19	0.696006	1.00041	1.23416		-0.837713	-0.995771	-1.20199		-0.874985	-1.12652	-1.27542	-0.862078	-1.00222	-1.2047
20	0.983064	1.19329	1.32067		-0.918352	-0.998952	-1.10261		-0.983374	-1.12125	-1.16184	-0.9344	-1.01018	-1.10969
21	0.38508	0.279432	1.14459		-0.897208	-0.733017	-1.56488		-0.828811	-0.721353	-1.58259	-0.90124	-0.738477	-1.54876
22	1.23721	0.712851	1.20729		-1.03936	-0.81324	-1.13763		-1.11858	-0.84024	-1.17095	-1.04095	-0.823682	-1.15548
23	1.26688	0.319929	1.11773		-1.03053	-0.511045	-1.31378		-1.03437	-0.453233	-1.35199	-1.03765	-0.547735	-1.30534
24	1.19161	0.356948	0.326413		-1.2198	-0.91072	-0.744408		-1.26091	-0.903981	-0.751575	-1.2254	-0.930206	-0.752577
25	1.26119	1.12009	1.36213		-0.996491	-0.948016	-1.07019		-1.04809	-0.995377	-1.08836	-1.00178	-0.959212	-1.07165
26	1.25803	0.84907	1.42133		-1.01067	-0.843344	-1.16662		-1.046	-0.836622	-1.22859	-1.01503	-0.86749	-1.1635
27	0.315279	0.385791	1.27357		-0.765012	-0.869928	-1.58131		-0.705925	-0.803262	-1.61512	-0.775763	-0.885512	-1.54306
28	1.41773	0.609176	0.498357		-1.20787	-0.972829	-0.736367		-1.27165	-0.983479	-0.693792	-1.19611	-0.979324	-0.772646
29	1.31303	0.993302	0.728014		-1.13653	-1.04761	-0.781067		-1.21676	-1.05003	-0.775494	-1.13648	-1.06386	-0.794526
30	0.376079	0.262153	1.03193		-0.908976	-0.726145	-1.54408		-0.796203	-0.679534	-1.56421	-0.917943	-0.719609	-1.52045
31	0.37218	1.01261	0.30476		-0.961206	-1.22396	-0.717728		-0.960724	-1.27511	-0.713826	-0.984469	-1.22671	-0.731358
32	0.370044	0.318303	0.952996		-0.881562	-0.805845	-1.48406		-0.857159	-0.828113	-1.53212	-0.88643	-0.795193	-1.51654
33	0.245448	0.265401	1.01722		-0.793728	-0.83503	-1.60967		-0.767255	-0.848278	-1.64297	-0.777004	-0.827248	-1.62488
34	0.350534	1.27445	0.279123		-0.953306	-1.25163	-0.678234		-0.985972	-1.29885	-0.637602	-0.958387	-1.24179	-0.710209
35	0.40146	1.1435	0.317791		-0.969316	-1.23462	-0.698129		-0.933212	-1.26042	-0.710219	-0.980352	-1.23603	-0.714817
36	0.653692	1.03891	0.792159		-0.90313	-1.07706	-0.989295		-0.946471	-1.20556	-0.95545	-0.908756	-1.07099	-1.02186
37	1.25912	0.910839	1.53247		-0.994736	-0.854525	-1.18502		-0.941778	-0.816118	-1.18241	-0.997339	-0.849581	-1.20151
38	1.39533	0.440471	0.524389		-1.16788	-0.827617	-0.867894		-1.20921	-0.793215	-0.86843	-1.16453	-0.839728	-0.895056
39	0.987742	0.282216	1.09101		-1.01599	-0.513826	-1.37161		-0.988952	-0.454638	-1.4422	-1.01846	-0.524314	-1.36973
40	1.30113	1.12774	0.808514		-1.10925	-1.06242	-0.799793		-1.09001	-1.03873	-0.803396	-1.11337	-1.0698	-0.815085
41	1.11282	0.513959	0.727537		-1.1005	-0.821194	-1.00606		-1.13621	-0.839914	-0.974142	-1.07403	-0.796578	-1.06431
42	1.08677	0.607285	0.559292		-1.14865	-0.960694	-0.831609		-1.22915	-0.979393	-0.791043	-1.14458	-0.98058	-0.845942
43	0.602414	1.1175	0.344414		-1.09585	-1.2499	-0.613026		-1.11667	-1.3141	-0.602412	-1.13342	-1.24909	-0.628707
44	0.767748	1.38111	0.696902		-0.964203	-1.15224	-0.823818		-0.982732	-1.18248	-0.777797	-0.964636	-1.15092	-0.846847
45	0.764805	1.19368	1.07135		-0.872153	-1.04901	-1.06594		-0.857149	-1.08048	-1.08366	-0.874635	-1.05229	-1.09887
46	0.250168	1.18985	0.197229		-0.944819	-1.26732	-0.656099		-0.91845	-1.27439	-0.666108	-0.95595	-1.26793	-0.674571
47	1.34308	0.406519	0.459741		-1.18005	-0.84052	-0.839758		-1.21443	-0.805292	-0.827181	-1.17912	-0.854964	-0.857122
48	0.295265	0.33551	1.26963		-0.778838	-0.846196	-1.6129		-0.772301	-0.828244	-1.67511	-0.789402	-0.850588	-1.58952
49	1.05679	1.22702	1.24663		-0.95024	-1.01024	-1.04713		-0.884834	-0.928447	-1.03411	-0.954565	-1.01439	-1.05394
50	0.721171	0.988326	1.31499		-0.841387	-0.981143	-1.22663		-0.877754	-1.09305	-1.30455	-0.867048	-0.988851	-1.21873
51	1.34388	1.08616	0.805409		-1.11894	-1.04942	-0.800561		-1.12553	-1.07479	-0.74942	-1.11808	-1.04843	-0.833613
52	0.168473	1.07726	1.16051		-0.324286	-0.982104	-1.47628		-0.287274	-0.954743	-1.5479	-0.353121	-0.989697	-1.4526
53	0.783663	1.17811	1.23825		-0.8524	-1.02238	-1.13461		-0.873722	-1.03729	-1.14627	-0.858423	-1.02597	-1.15262
54	1.26578	0.509376	0.399647		-1.22323	-0.981275	-0.709638		-1.26441	-0.973477	-0.68184	-1.2212	-0.992463	-0.734362
55	0.558964	0.411623	1.04563		-0.937404	-0.790999	-1.3831		-0.888235	-0.739261	-1.4203	-0.946639	-0.79503	-1.37698
56	0.606905	0.57519	1.24156		-0.890332	-0.864555	-1.36664		-0.804108	-0.795949	-1.39098	-0.902415	-0.871599	-1.34591
57	0.968066	1.31608	0.397829		-1.19856	-1.26869	-0.52786		-1.22533	-1.29273	-0.464158	-1.18599	-1.2579	-0.565386
58	1.25052	0.603309	1.18701		-1.04575	-0.749011	-1.17397		-1.12379	-0.722706	-1.21562	-1.04904	-0.782751	-1.16986
59	0.336763	0.281561	1.2188		-0.859183	-0.765458	-1.60672		-0.844187	-0.757659	-1.66848	-0.867602	-0.77576	-1.58092
60	1.20961	0.927563	1.43139		-0.994217	-0.880676	-1.15554		-0.93615	-0.842254	-1.17729	-0.998699	-0.892359	-1.17101
61	1.24336	0.44867	0.27363		-1.28299	-1.05681	-0.593291		-1.30877	-1.01308	-0.600832	-1.27723	-1.06632	-0.6138
62	0.69179	1.20281	0.409081		-1.08926	-1.23317	-0.636351		-1.08845	-1.26337	-0.628227	-1.09254	-1.23322	-0.662457
63	1.21539	0.606121	0.31614		-1.2793	-1.11968	-0.56614		-1.31348	-1.12306	-0.554822	-1.28176	-1.12515	-0.583247
64	1.01567	0.220484	0.269804		-1.18431	-0.788822	-0.843734		-1.19985	-0.791037	-0.820489	-1.18637	-0.796175	-0.881731
65	1.2046	1.30476	0.855717		-1.06858	-1.09503	-0.809787		-1.10623	-1.13146	-0.792771	-1.07233	-1.10436	-0.824208
66	0.276881	1.13524	0.257322		-0.892539	-1.22917	-0.733859		-0.853557	-1.24964	-0.738302	-0.907486	-1.22315	-0.759174
67	1.17524	0.292635	0.349146		-1.18241	-0.807139	-0.844196		-1.21674	-0.793939	-0.817658	-1.17313	-0.824066	-0.880274
68	0.771404	0.270544	1.19772		-0.993121	-0.535547	-1.45586		-0.994561	-0.522792	-1.50383	-0.97123	-0.543393	-1.47294
69	0.734375	1.30725	1.20374		-0.815997	-1.04852	-1.11618		-0.847973	-1.15794	-1.10006	-0.828835	-1.04529	-1.13217
70	0.308095	1.41021	0.251743		-0.933392	-1.25884	-0.672795		-0.943775	-1.29287	-0.650884	-0.945024	-1.25307	-0.703724
71	0.455329	0.377169	0.969025		-0.907203	-0.81524	-1.41358		-0.918618	-0.75994	-1.45345	-0.905812	-0.822472	-1.43794
72	0.73423	0.91058	1.25724		-0.870255	-0.966028	-1.21921		-0.841254	-0.922962	-1.23689	-0.872286	-0.97028	-1.22806
73	1.1282	0.656618	0.548859		-1.16075	-0.991408	-0.792943		-1.19779	-0.989276	-0.786451	-1.1619	-1.00847	-0.808352
74	0.52975	1.25334	0.6311		-0.857584	-1.1403	-0.908057		-0.850322	-1.20789	-0.868844	-0.852828	-1.12734	-0.949736
75	1.05043	0.830983	0.657456		-1.11024	-1.03182	-0.827129		-1.18444	-1.15587	-0.801707	-1.10743	-1.0692	-0.840172
76	1.22442	0.257369	0.330568		-1.17705	-0.769926	-0.862407		-1.19881	-0.773432	-0.810556	-1.1674	-0.774488	-0.902476
77	1.33061	0.990689	0.445029		-1.2469	-1.17538	-0.564327		-1.25817	-1.16282	-0.525173	-1.24794	-1.18249	-0.583362
78	0.241171	0.207378	1.08127		-0.8405	-0.760107	-1.66259		-0.808341	-0.734095	-1.67182	-0.852161	-0.768363	-1.66853
79	1.21408	0.888521	1.02021		-1.05511	-0.935505	-0.995082		-1.09736	-0.948766	-0.998516	-1.05654	-0.937236	-1.02234
80	1.11496	1.33279	1.14713		-0.975772	-1.04349	-0.970476		-1.00162	-1.07546	-0.994144	-0.985446	-1.05082	-0.986925
81	0.330166	0.312564	1.33181		-0.826392	-0.797546	-1.6214		-0.876953	-0.843094	-1.72695	-0.843459	-0.815602	-1.58674
82	0.30224	1.15472	0.18669		-1.03978	-1.30334	-0.573577		-1.05863	-1.31086	-0.543537	-1.05491	-1.31485	-0.583441
83	0.464099	0.247424	1.12566		-0.946919	-0.639031	-1.5426		-0.908638	-0.613287	-1.5858	-0.955687	-0.654344	-1.5342
84	0.219425	0.260219	1.19434		-0.752131	-0.843407	-1.67058		-0.778705	-0.89287	-1.75088	-0.764596	-0.85926	-1.65114
85	0.318082	1.26794	0.930998		-0.547844	-1.04959	-1.24162		-0.497603	-1.05646	-1.27248	-0.571325	-1.06177	-1.24778
86	0.943086	0.775523	1.15506		-0.982412	-0.898444	-1.15438		-1.0312	-0.933896	-1.18401	-0.976141	-0.912418	-1.18201
87	0.449523	1.19863	1.02952		-0.669715	-1.05415	-1.19791		-0.622241	-1.12187	-1.25193	-0.706839	-1.04912	-1.1997
88	1.17142	1.04613	0.22159		-1.37452	-1.35695	-0.338612		-1.42878	-1.40223	-0.289281	-1.36479	-1.34257	-0.369747
89	0.419665	1.28008	1.12817		-0.610463	-1.04544	-1.24629		-0.596212	-1.10391	-1.23384	-0.62564	-1.04633	-1.25802
90	1.05239	0.512978	0.833592		-1.07167	-0.794586	-1.08345		-1.18861	-0.797627	-1.07222	-1.06637	-0.801916	-1.11584
91	1.2403	0.320397	0.387612		-1.17799	-0.805255	-0.853802		-1.20919	-0.801685	-0.807118	-1.16699	-0.804878	-0.897052
92	1.14101	0.376759	0.41389		-1.17866	-0.857456	-0.836497		-1.22961	-0.846653	-0.796145	-1.17414	-0.875754	-0.862001
93	1.10463	1.27923	0.697037		-1.09342	-1.13847	-0.738844		-1.07472	-1.12747	-0.711464	-1.09314	-1.13916	-0.762836
94	0.286494	0.242761	1.28581		-0.843482	-0.755254	-1.66447		-0.863006	-0.7791	-1.71831	-0.85034	-0.756665	-1.65221
95	0.305265	0.229564	1.1226		-0.877283	-0.728159	-1.62535		-0.892974	-0.724177	-1.67231	-0.904806	-0.733888	-1.5791
96	0.116683	1.27542	0.933243		-0.246953	-0.968871	-1.46557		-0.193606	-0.949546	-1.51878	-0.286211	-0.985213	-1.44035
97	0.774624	0.707153	1.13913		-0.94187	-0.901146	-1.2189		-1.01573	-0.975436	-1.25208	-0.965515	-0.93548	-1.24446
98	1.29754	0.573866	0.747972		-1.11958	-0.837653	-0.958497		-1.17785	-0.83496	-0.95067	-1.11287	-0.844804	-0.996648
99	0.274583	1.15128	0.258609		-0.886588	-1.22781	-0.737839		-0.885157	-1.25386	-0.6868	-0.897953	-1.22429	-0.766142
100	1.18497	0.290748	0.269251		-1.22962	-0.894235	-0.732709		-1.2473	-0.866818	-0.711567	-1.22492	-0.898648	-0.765095
101	1.16817	0.706044	0.591473		-1.15376	-0.994122	-0.800747		-1.21281	-1.00336	-0.781233	-1.14854	-1.00307	-0.822451
102	1.19098	0.711835	0.807883		-1.09826	-0.912685	-0.946059		-1.11258	-0.931906	-0.955511	-1.09429	-0.919253	-0.970337
103	1.14151	0.336122	0.427144		-1.16145	-0.800246	-0.889688		-1.18135	-0.844032	-0.805923	-1.15267	-0.789366	-0.934848
104	0.387553	1.00705	0.353527		-0.929861	-1.19896	-0.770973		-0.952686	-1.21242	-0.787169	-0.944125	-1.18672	-0.803775
105	0.512779	0.372105	1.34598		-0.906834	-0.745048	-1.52182		-0.844987	-0.744712	-1.53846	-0.910097	-0.714756	-1.51704
106	1.21423	1.16652	0.728987		-1.11352	-1.1009	-0.758035		-1.17987	-1.15258	-0.700715	-1.11666	-1.1018	-0.782038
107	0.594986	1.3591	0.525532		-0.950592	-1.19091	-0.773469		-0.955257	-1.25288	-0.756583	-0.972655	-1.19459	-0.790328
108	1.1547	1.24794	0.327284		-1.29146	-1.30648	-0.431852		-1.3095	-1.32691	-0.361712	-1.27755	-1.29201	-0.471946
109	1.33242	0.359045	0.420651		-1.18127	-0.819332	-0.843558		-1.20934	-0.790684	-0.844683	-1.17595	-0.837457	-0.869399
110	0.627189	0.582453	1.43674		-0.880407	-0.84404	-1.42067		-0.875175	-0.840316	-1.45942	-0.891217	-0.817305	-1.42579
111	0.296329	1.10085	1.3524		-0.474669	-1.00422	-1.42227		-0.385911	-1.02127	-1.47206	-0.530087	-1.01389	-1.41582
112	1.33881	0.377721	0.756609		-1.09245	-0.65961	-1.09265		-1.14283	-0.658858	-1.07679	-1.10455	-0.67863	-1.11295
113	1.16711	0.908186	0.738161		-1.10845	-1.02385	-0.836629		-1.19312	-1.07223	-0.842175	-1.10693	-1.03999	-0.857476
114	0.709515	1.31448	0.267664		-1.21566	-1.33427	-0.456555		-1.21887	-1.34164	-0.409456	-1.20017	-1.3328	-0.495555
115	1.19977	0.637881	0.781922		-1.10441	-0.877954	-0.961368		-1.20448	-0.899657	-0.953043	-1.10051	-0.883247	-0.996064
116	1.25904	1.03463	1.19403		-1.02642	-0.948954	-1.02461		-0.967159	-0.88985	-1.01181	-1.03748	-0.955051	-1.03297
117	0.471312	1.15192	0.393613		-0.962613	-1.20934	-0.739234		-0.945109	-1.26481	-0.731157	-0.973886	-1.20654	-0.764725
118	1.04602	1.29474	0.866955		-1.02223	-1.09554	-0.854413		-1.01312	-1.10731	-0.894619	-1.03253	-1.10477	-0.861805
119	1.05497	1.31615	0.402513		-1.21908	-1.26872	-0.513565		-1.23613	-1.24706	-0.46641	-1.20933	-1.27638	-0.540184
120	0.389541	0.447767	1.13288		-0.811424	-0.881393	-1.47487		-0.741835	-0.804553	-1.50877	-0.81551	-0.891104	-1.44959
121	0.417586	1.37217	0.474157		-0.8396	-1.17887	-0.842232		-0.816932	-1.22881	-0.80289	-0.853313	-1.16443	-0.883075
122	0.178733	0.284478	1.22315		-0.653878	-0.897047	-1.68222		-0.612322	-0.793071	-1.68488	-0.650111	-0.9141	-1.65627
123	0.306802	1.258	0.851287		-0.556201	-1.05682	-1.21555		-0.490871	-1.07177	-1.27514	-0.600498	-1.07429	-1.20051
124	1.09677	0.904328	0.243492		-1.33908	-1.30447	-0.398393		-1.3747	-1.35462	-0.334856	-1.34556	-1.31863	-0.416371
125	0.341756	0.399664	1.00854		-0.80596	-0.884608	-1.4772		-0.809289	-0.888886	-1.54365	-0.80595	-0.898528	-1.46379
126	1.43875	0.522039	0.386576		-1.24462	-0.993371	-0.673178		-1.28998	-0.993047	-0.638286	-1.23141	-1.0031	-0.700769
127	0.373895	0.968892	1.13673		-0.617303	-1.01925	-1.32769		-0.567162	-1.07853	-1.37942	-0.658217	-1.02751	-1.31893
128	1.00564	1.11308	1.24598		-0.946552	-0.988426	-1.08396		-1.02413	-1.09019	-1.13252	-0.962835	-0.99353	-1.09388
129	0.336043	0.411248	1.24326		-0.772652	-0.876611	-1.55202		-0.712316	-0.820173	-1.5795	-0.783211	-0.879588	-1.52991
130	0.257202	1.36806	0.43216		-0.671316	-1.13546	-0.971348		-0.658855	-1.15837	-0.940166	-0.672526	-1.12176	-1.02729
131	1.10712	0.552327	0.463804		-1.18371	-0.976838	-0.769574		-1.22086	-0.99382	-0.748465	-1.18464	-0.984764	-0.788005
132	0.745951	1.36548	0.652463		-0.972991	-1.16219	-0.803288		-0.956131	-1.2457	-0.787419	-0.980988	-1.15653	-0.833638
133	0.306479	1.25979	0.386912		-0.786184	-1.17355	-0.867263		-0.756311	-1.20142	-0.848818	-0.795463	-1.16427	-0.907967
134	0.991589	1.18297	0.164406		-1.40767	-1.42971	-0.269823		-1.45372	-1.48216	-0.214785	-1.38237	-1.41234	-0.310479
135	0.25901	0.166948	1.20899		-0.889847	-0.65872	-1.6979		-0.826414	-0.622148	-1.72309	-0.897796	-0.658397	-1.66953
136	0.513101	1.09512	1.18133		-0.710485	-1.02937	-1.24207		-0.669261	-1.05944	-1.32714	-0.747388	-1.03863	-1.23924
137	1.17352	0.786381	0.74714		-1.10952	-0.97082	-0.881435		-1.15517	-0.980923	-0.87519	-1.13301	-0.972274	-0.905969
138	1.19877	0.291578	0.326025		-1.19526	-0.82772	-0.813483		-1.22893	-0.812372	-0.807998	-1.19109	-0.853577	-0.839866
139	1.29751	0.535846	0.434053		-1.21426	-0.972986	-0.72685		-1.27468	-0.969428	-0.712467	-1.21128	-0.984691	-0.749159
140	1.22537	0.965802	0.486594		-1.20988	-1.14693	-0.621109		-1.29216	-1.20666	-0.587571	-1.23186	-1.1688	-0.625538
141	1.05666	0.864251	0.271281		-1.30785	-1.26786	-0.447139		-1.35129	-1.27517	-0.422678	-1.31109	-1.27088	-0.472083
142	0.317804	1.16985	0.29446		-0.899895	-1.22367	-0.741282		-0.881716	-1.24391	-0.718507	-0.916828	-1.22872	-0.754024
143	1.18759	0.301499	0.192606		-1.29867	-1.02708	-0.584445		-1.32013	-1.02318	-0.564441	-1.29663	-1.03275	-0.606764
144	0.331283	1.20698	0.197219		-1.05413	-1.30763	-0.562647		-1.02473	-1.32115	-0.575857	-1.07365	-1.31685	-0.569684
145	0.339499	0.269608	1.16518		-0.87225	-0.752223	-1.59775		-0.774824	-0.703891	-1.61332	-0.888269	-0.747489	-1.55925
146	0.517345	1.31793	0.394147		-0.988977	-1.23145	-0.694008		-0.972384	-1.26579	-0.654959	-1.00636	-1.22559	-0.71355
147	0.266203	0.375141	1.27323		-0.713696	-0.891701	-1.60939		-0.666548	-0.791134	-1.60952	-0.710314	-0.90847	-1.60106
148	1.09815	0.490429	0.330486		-1.24143	-1.0359	-0.657032		-1.30007	-1.04386	-0.662639	-1.26183	-1.07583	-0.654791
149	0.609868	0.544447	1.1974		-0.905088	-0.850741	-1.36163		-0.946329	-0.893117	-1.43951	-0.923128	-0.863999	-1.35141
150	1.02357	0.153656	0.289205		-1.12267	-0.618697	-1.00362		-1.13104	-0.611762	-0.996802	-1.123	-0.646441	-1.02043
151	1.01811	1.14356	1.3199		-0.935967	-0.984478	-1.10343		-0.956855	-0.989496	-1.12563	-0.944294	-0.986472	-1.11952
152	0.357824	1.19335	0.392873		-0.849379	-1.18594	-0.82548		-0.84917	-1.22376	-0.807303	-0.866549	-1.18481	-0.846972
153	1.18156	0.235157	0.979272		-1.01953	-0.439939	-1.34722		-1.01173	-0.360886	-1.41595	-1.03282	-0.484625	-1.32762
154	1.14789	1.23624	0.852107		-1.05868	-1.08378	-0.832447		-1.05126	-1.04615	-0.855978	-1.05645	-1.0953	-0.848972
155	1.02083	0.415262	0.308661		-1.23262	-0.999228	-0.687514		-1.27235	-0.987569	-0.695645	-1.23582	-1.04726	-0.685247
156	0.171767	0.270349	1.20008		-0.656061	-0.89411	-1.68834		-0.657778	-0.888941	-1.75612	-0.643937	-0.906144	-1.68229
157	1.17421	0.465197	0.547494		-1.14959	-0.854002	-0.892484		-1.22753	-0.841208	-0.863455	-1.13714	-0.866259	-0.927245
158	1.15075	1.05138	0.807299		-1.08071	-1.04975	-0.845148		-1.02794	-1.00427	-0.808943	-1.07994	-1.05732	-0.87005
159	1.03416	0.861109	1.36797		-0.969042	-0.888769	-1.1897		-0.966633	-0.896019	-1.21163	-0.976742	-0.898272	-1.19234
160	1.20102	1.14737	0.785129		-1.09431	-1.07929	-0.799774		-1.1341	-1.13188	-0.769998	-1.1084	-1.0954	-0.81748
161	0.824824	1.04888	1.29132		-0.882059	-0.98582	-1.16874		-0.860849	-0.956757	-1.17574	-0.891394	-0.993071	-1.1855
162	1.27224	0.277073	0.369383		-1.16914	-0.759601	-0.881647		-1.19945	-0.75377	-0.819352	-1.1587	-0.766529	-0.929176
163	0.787166	1.01971	1.25766		-0.875231	-0.987228	-1.17451		-0.887946	-0.963397	-1.19656	-0.886059	-0.990633	-1.18137
164	1.25133	1.36701	0.567968		-1.17734	-1.20037	-0.605958		-1.20697	-1.22034	-0.51078	-1.16247	-1.1905	-0.654066
165	0.474869	0.424538	1.22931		-0.874282	-0.818004	-1.47861		-0.784844	-0.739493	-1.49798	-0.877088	-0.828651	-1.45672
166	0.449711	0.700999	0.943506		-0.791595	-0.989899	-1.265		-0.733202	-0.965332	-1.30482	-0.813858	-1.00041	-1.28632
167	0.567531	1.04364	0.731281		-0.868132	-1.09227	-0.990352		-0.877007	-1.17437	-0.995825	-0.887817	-1.09348	-1.00473
168	1.0504	0.364207	1.16031		-1.02321	-0.586844	-1.32779		-1.05575	-0.596438	-1.35502	-1.03349	-0.615473	-1.35416
169	0.990575	1.09692	0.715276		-1.06335	-1.0972	-0.812556		-1.13462	-1.18039	-0.824794	-1.08498	-1.11095	-0.820868
170	1.17374	0.574117	0.701979		-1.11723	-0.867915	-0.944868		-1.18808	-0.868553	-0.91836	-1.10903	-0.867311	-0.977233
171	0.308609	1.34041	0.265604		-0.916994	-1.24655	-0.697484		-0.887837	-1.25514	-0.678093	-0.929232	-1.24054	-0.723664
172	0.248337	1.19981	0.251404		-0.853226	-1.22069	-0.758591		-0.886458	-1.26598	-0.743704	-0.898424	-1.23941	-0.76668
173	1.05825	1.16741	0.727249		-1.07533	-1.10719	-0.789687		-1.10614	-1.19074	-0.794964	-1.09139	-1.10973	-0.810195
174	1.3054	0.318846	0.415275		-1.16801	-0.776138	-0.881445		-1.19635	-0.760699	-0.849918	-1.15212	-0.777337	-0.924538
175	0.299992	0.215649	1.19192		-0.880419	-0.707005	-1.65136		-0.863596	-0.684546	-1.68962	-0.890284	-0.710622	-1.63816
176	1.06721	1.31163	0.472839		-1.18107	-1.23212	-0.574018		-1.18906	-1.2165	-0.489142	-1.16174	-1.22936	-0.624521
177	0.507515	1.21152	0.445549		-0.948817	-1.19718	-0.764678		-0.95092	-1.25783	-0.738429	-0.981918	-1.19305	-0.78747
178	1.29359	0.456464	0.428322		-1.20194	-0.913973	-0.773108		-1.26193	-0.91239	-0.747318	-1.19323	-0.929359	-0.798963
179	0.973551	1.19014	0.446034		-1.17259	-1.22341	-0.588515		-1.1577	-1.22768	-0.541527	-1.16683	-1.2177	-0.62759
180	1.15283	0.474583	1.33852		-1.021	-0.644804	-1.30774		-0.969278	-0.594071	-1.37184	-1.02509	-0.672739	-1.30483
181	0.375006	1.29684	0.457632		-0.811649	-1.16962	-0.869298		-0.794093	-1.20881	-0.854562	-0.818851	-1.15908	-0.908991
182	0.670722	1.22933	0.827421		-0.879678	-1.09916	-0.969453		-0.866799	-1.09277	-0.990541	-0.88129	-1.10698	-0.988576
183	1.34494	0.510218	0.598502		-1.15459	-0.850375	-0.884719		-1.22586	-0.849316	-0.860906	-1.14765	-0.866906	-0.912901
184	1.36111	0.940303	0.35481		-1.29813	-1.21991	-0.487076		-1.30983	-1.23098	-0.431751	-1.29257	-1.20637	-0.521451
185	0.652448	0.764576	1.20922		-0.867196	-0.939923	-1.2712		-0.810654	-0.885282	-1.27694	-0.859795	-0.958374	-1.27029
186	0.93421	1.38308	0.523182		-1.1125	-1.21718	-0.638782		-1.13759	-1.2414	-0.568257	-1.10415	-1.20768	-0.676027
187	0.485501	1.06462	0.345132		-1.02056	-1.22824	-0.68258		-1.02476	-1.26684	-0.693935	-1.05607	-1.24523	-0.682376
188	1.08993	1.1857	1.01807		-1.00633	-1.03775	-0.944268		-0.998705	-1.07684	-0.949407	-1.01248	-1.03663	-0.969757
189	0.757103	0.608356	1.12415		-0.955995	-0.856843	-1.2556		-0.87566	-0.812639	-1.27348	-0.96453	-0.861321	-1.24905
190	1.24025	0.562954	0.740546		-1.1148	-0.83847	-0.967364		-1.17799	-0.83912	-0.953604	-1.11554	-0.851192	-0.98399
191	1.12096	1.24446	0.535123		-1.16446	-1.19237	-0.623906		-1.17792	-1.20272	-0.530139	-1.14808	-1.17898	-0.676979
192	0.557071	0.422601	1.3361		-0.90827	-0.770512	-1.48003		-0.852299	-0.723531	-1.54387	-0.918053	-0.775424	-1.46278
193	1.02835	0.223636	0.334308		-1.14975	-0.721064	-0.932219		-1.16394	-0.706515	-0.949039	-1.14636	-0.713003	-0.961369
194	1.03679	1.33652	0.875436		-1.01423	-1.10127	-0.854564		-1.07995	-1.17308	-0.83856	-1.01134	-1.09637	-0.88855
195	0.337765	1.14046	1.26563		-0.526155	-1.01708	-1.36557		-0.430168	-1.03473	-1.44668	-0.574232	-1.02123	-1.35373
196	0.433003	0.395114	1.41921		-0.849389	-0.802018	-1.56153		-0.739385	-0.697617	-1.5839	-0.861191	-0.807875	-1.51874
197	0.876078	1.25002	1.12874		-0.903938	-1.04438	-1.04362		-0.930324	-1.11404	-1.0999	-0.928278	-1.059	-1.05374
198	1.13039	0.568238	0.505271		-1.17157	-0.960713	-0.79723		-1.2309	-0.959921	-0.787226	-1.17451	-0.981816	-0.814744
199	1.25486	0.394998	0.363413		-1.21503	-0.912034	-0.751955		-1.27394	-0.903381	-0.72783	-1.19922	-0.930191	-0.792727
200	0.747406	0.895456	1.24055		-0.8815	-0.961748	-1.21206		-0.79408	-0.848663	-1.21486	-0.884385	-0.974502	-1.20796
201	1.19106	0.950613	0.340164		-1.28379	-1.23526	-0.48931		-1.29038	-1.2393	-0.4201	-1.27091	-1.22502	-0.535841
202	1.12969	0.992923	0.738588		-1.09768	-1.05452	-0.820706		-1.07949	-1.02378	-0.821842	-1.10606	-1.06393	-0.827656
203	1.26238	0.420977	0.161414		-1.37742	-1.20177	-0.42187		-1.39782	-1.20177	-0.416549	-1.39067	-1.22425	-0.425066
204	1.13833	1.28544	0.686216		-1.10593	-1.14263	-0.723228		-1.23391	-1.23117	-0.678391	-1.13196	-1.15582	-0.735388
205	0.70222	1.21726	0.726189		-0.932559	-1.12141	-0.893406		-0.959878	-1.20277	-0.860641	-0.945768	-1.12186	-0.914892
206	1.31728	0.763928	0.655562		-1.15617	-0.98379	-0.804684		-1.25957	-1.0439	-0.769305	-1.151	-0.99637	-0.828899
207	0.496703	0.460081	1.01984		-0.893673	-0.856789	-1.37347		-0.834013	-0.783382	-1.39689	-0.889814	-0.85887	-1.38148
208	0.287869	1.25049	0.152854		-1.08843	-1.33856	-0.511		-1.08358	-1.35673	-0.496344	-1.12485	-1.35129	-0.51943
209	0.298306	1.14841	0.35181		-0.814139	-1.18211	-0.843061		-0.820051	-1.22039	-0.823659	-0.836169	-1.18097	-0.860863
210	0.338017	1.13712	1.37165		-0.513214	-1.00981	-1.39613		-0.473885	-0.977655	-1.44119	-0.521706	-1.01685	-1.40178
211	1.37066	0.327332	0.872433		-1.06249	-0.563179	-1.19579		-1.06053	-0.498766	-1.26085	-1.07491	-0.597688	-1.19536
212	1.2316	0.462752	0.487922		-1.17458	-0.882212	-0.83384		-1.24173	-0.882875	-0.834667	-1.16519	-0.888221	-0.866019
213	0.894876	0.713232	1.2509		-0.96547	-0.86414	-1.22822		-1.01656	-0.902527	-1.26126	-0.978491	-0.869836	-1.24651
214	0.880555	0.493905	1.17114		-0.999371	-0.742159	-1.29281		-0.974126	-0.729084	-1.3283	-1.00499	-0.745407	-1.30845
215	0.74448	1.03926	1.27705		-0.849149	-0.994087	-1.19236		-0.905564	-1.10281	-1.258	-0.870365	-0.998072	-1.19508
216	0.296747	1.17013	0.255666		-0.921424	-1.24138	-0.704828		-0.882079	-1.26124	-0.706404	-0.942963	-1.2381	-0.721813
217	0.279284	0.324775	1.28514		-0.768107	-0.84796	-1.62904		-0.661888	-0.70192	-1.63097	-0.761799	-0.859219	-1.59611
218	1.25604	0.565671	0.653583		-1.13808	-0.873709	-0.903488		-1.20795	-0.898932	-0.878717	-1.13474	-0.886699	-0.924069
219	1.1266	1.30604	0.289575		-1.31478	-1.34082	-0.390288		-1.31164	-1.34445	-0.339885	-1.30533	-1.33452	-0.419487
220	0.571165	0.750631	1.16286		-0.830777	-0.956363	-1.28937		-0.811441	-0.955631	-1.30845	-0.818169	-0.983946	-1.2882
221	1.4423	0.614445	0.833379		-1.11741	-0.821845	-0.971465		-1.18859	-0.830095	-0.9451	-1.11545	-0.832121	-0.997678
222	0.300483	1.32699	0.256122		-0.919693	-1.24917	-0.692382		-0.925406	-1.28443	-0.661615	-0.937088	-1.23826	-0.728482
223	0.306525	1.40494	0.317498		-0.847848	-1.21426	-0.771925		-0.845634	-1.24276	-0.739401	-0.858726	-1.20662	-0.805432
224	0.396954	1.13041	0.503726		-0.818219	-1.14809	-0.910949		-0.815457	-1.16746	-0.914771	-0.818379	-1.15378	-0.933386
225	1.25666	1.11861	0.470482		-1.2246	-1.19583	-0.569513		-1.22679	-1.19976	-0.50034	-1.21796	-1.18771	-0.602001
226	0.292491	0.246594	1.14396		-0.852519	-0.762551	-1.62834		-1.00231	-0.839058	-1.76558	-0.869629	-0.783711	-1.60723
227	0.432239	0.230429	1.17114		-0.939624	-0.628124	-1.57761		-0.913819	-0.656705	-1.63326	-0.937678	-0.630406	-1.56281
228	1.1544	0.302999	0.274384		-1.23011	-0.905912	-0.728503		-1.24947	-0.908508	-0.709951	-1.23513	-0.91953	-0.747673
229	0.471966	0.52947	1.20897		-0.831108	-0.887842	-1.42797		-0.832774	-0.913261	-1.5047	-0.838023	-0.894447	-1.43261
230	0.493035	1.18437	1.08254		-0.697887	-1.04923	-1.19735		-0.699815	-1.10885	-1.20983	-0.723047	-1.05122	-1.21416
231	1.19499	0.543995	0.698061		-1.1186	-0.84563	-0.955836		-1.168	-0.830981	-0.935584	-1.11712	-0.843374	-0.989871
232	1.14684	1.26763	0.538467		-1.1687	-1.19521	-0.617781		-1.19895	-1.22505	-0.54147	-1.16039	-1.18267	-0.659865
233	1.24824	1.26162	0.833106		-1.08692	-1.0904	-0.796104		-1.03412	-1.04559	-0.797992	-1.08567	-1.09951	-0.815782
234	0.702431	1.19804	0.807434		-0.907017	-1.09938	-0.948568		-0.904438	-1.15234	-0.970874	-0.911391	-1.1125	-0.964313
235	0.744446	1.03927	1.27706		-0.849131	-0.994093	-1.19237		-0.905509	-1.10274	-1.25832	-0.870261	-0.997983	-1.19536
236	0.657573	0.494683	1.12327		-0.945377	-0.811694	-1.33758		-0.92247	-0.769663	-1.35571	-0.950061	-0.816311	-1.35799
237	0.279281	0.324785	1.28508		-0.768099	-0.847974	-1.62902		-0.66162	-0.701413	-1.63111	-0.761692	-0.859145	-1.59604
238	1.25556	0.565714	0.653557		-1.13804	-0.873794	-0.903506		-1.20794	-0.899059	-0.878759	-1.13468	-0.886688	-0.924099
239	0.444615	0.987518	1.33282		-0.653222	-1.00477	-1.35124		-0.618421	-0.997636	-1.4476	-0.6838	-0.9923	-1.35364
240	1.07089	0.26229	1.27917		-1.002	-0.446551	-1.43044		-0.995356	-0.383838	-1.49924	-1.01204	-0.498401	-1.40444
241	0.772609	1.19718	0.641785		-1.00217	-1.14337	-0.808981		-1.0065	-1.17892	-0.807469	-1.00688	-1.14953	-0.826436
242	1.09867	0.871733	1.32164		-0.988639	-0.889507	-1.15475		-0.920178	-0.849851	-1.15308	-0.994534	-0.887884	-1.16251
243	0.432045	1.42349	0.280898		-1.02786	-1.28413	-0.603855		-0.997121	-1.30137	-0.606793	-1.04434	-1.28235	-0.623216
244	0.364802	1.36143	0.46317		-0.792111	-1.1674	-0.879164		-0.773938	-1.20342	-0.837673	-0.795073	-1.151	-0.920235
245	0.844651	0.787096	1.34121		-0.927527	-0.895429	-1.25148		-0.866903	-0.842235	-1.27056	-0.935749	-0.901294	-1.24199
246	0.361198	1.18038	1.11613		-0.568896	-1.03436	-1.29405		-0.494958	-1.03951	-1.35492	-0.599086	-1.03989	-1.28958
247	0.447977	0.402987	1.30841		-0.861885	-0.807848	-1.52332		-0.960735	-0.880039	-1.66653	-0.879431	-0.83781	-1.48639
248	0.284419	1.16104	0.330432		-0.814922	-1.18791	-0.831053		-0.813035	-1.21689	-0.826127	-0.824545	-1.18727	-0.856415
249	1.26358	0.456493	1.1067		-1.0504	-0.650436	-1.2171		-1.11252	-0.601021	-1.23987	-1.04844	-0.683706	-1.22288
250	0.37748	1.19495	0.260133		-1.0099	-1.26998	-0.630377		-0.991304	-1.29368	-0.624996	-1.02577	-1.27244	-0.648105
251	0.970767	1.0788	0.386627		-1.20953	-1.23481	-0.549942		-1.18693	-1.24593	-0.527978	-1.21836	-1.26452	-0.555001
252	0.506556	1.15726	0.442646		-0.953861	-1.19297	-0.768572		-0.957212	-1.26182	-0.73973	-0.966487	-1.18895	-0.794864
253	0.38241	1.15941	0.376398		-0.893006	-1.19872	-0.786852		-0.859239	-1.23191	-0.758183	-0.89703	-1.18936	-0.82519
254	1.26225	0.883762	1.19984		-1.03577	-0.892414	-1.06987		-1.08526	-0.907044	-1.10213	-1.03571	-0.890922	-1.09
255	1.05204	1.18105	0.438545		-1.19808	-1.22649	-0.566074		-1.25299	-1.2927	-0.52086	-1.20346	-1.22386	-0.592418
256	0.85359	1.32298	0.970164		-0.921912	-1.08355	-0.962474		-0.949261	-1.1551	-1.00526	-0.928059	-1.0937	-0.982093
257	0.105438	0.235003	1.15738		-0.525664	-0.927215	-1.72169		-0.519244	-0.883497	-1.73393	-0.519347	-0.93985	-1.7348
258	0.509424	1.02571	0.52933		-0.914704	-1.144	-0.868892		-0.940223	-1.13857	-0.870393	-0.905297	-1.12726	-0.904207
259	0.368507	1.42874	0.441545		-0.808306	-1.1797	-0.849424		-0.811033	-1.21952	-0.820563	-0.819471	-1.17536	-0.88755
260	0.307756	0.247708	1.15488		-0.863965	-0.749996	-1.62254		-0.759877	-0.691317	-1.63302	-0.870218	-0.750416	-1.59905
261	0.550943	1.56782	0.489584		-0.931366	-1.21247	-0.748508		-0.890301	-1.23558	-0.74884	-0.950275	-1.21126	-0.762486
262	1.3226	0.466026	1.02012		-1.06532	-0.669662	-1.16654		-1.13185	-0.64453	-1.17331	-1.06855	-0.682792	-1.18132
263	1.17602	0.296276	0.362274		-1.17746	-0.799721	-0.856192		-1.20802	-0.798906	-0.806579	-1.17131	-0.808002	-0.884223
264	1.12702	0.962925	0.286999		-1.31093	-1.28023	-0.436262		-1.34212	-1.32774	-0.408794	-1.322	-1.28897	-0.445735
265	0.269666	0.334693	1.33411		-0.745953	-0.860192	-1.63929		-0.66684	-0.722794	-1.64101	-0.74691	-0.872854	-1.60281
266	1.19344	0.256532	0.326216		-1.17792	-0.774877	-0.859792		-1.19639	-0.76318	-0.856118	-1.18219	-0.789369	-0.886597
267	1.18834	0.555705	0.441569		-1.20319	-0.988206	-0.734951		-1.25868	-1.00576	-0.698812	-1.1937	-1.01364	-0.766656
268	0.409728	0.330073	1.29705		-0.8755	-0.763836	-1.5698		-0.794882	-0.693343	-1.57917	-0.887013	-0.761923	-1.57541
269	0.21256	0.202507	0.913344		-0.820825	-0.795258	-1.63859		-0.730639	-0.698105	-1.61982	-0.829499	-0.781943	-1.57871
270	0.306705	1.02842	1.1747		-0.523631	-1.01474	-1.37507		-0.459666	-1.02667	-1.4122	-0.552836	-1.02197	-1.36512
271	0.952284	1.07652	0.505662		-1.13739	-1.17198	-0.666092		-1.11714	-1.15908	-0.612113	-1.13256	-1.17492	-0.701385
272	0.455933	1.33723	0.404726		-0.929516	-1.21529	-0.744711		-0.885494	-1.24518	-0.738307	-0.941751	-1.20936	-0.772278
273	0.184102	1.31774	1.04161		-0.339742	-0.995609	-1.40836		-0.317234	-1.00543	-1.38656	-0.3525	-0.998324	-1.41864
274	0.458569	0.938934	1.18527		-0.697017	-1.01032	-1.30303		-0.691853	-1.02748	-1.3385	-0.705967	-1.01483	-1.29873
275	0.241892	0.292687	1.24517		-0.750154	-0.851557	-1.65366		-0.756565	-0.884782	-1.71218	-0.754634	-0.856908	-1.64342
276	1.18345	1.03691	0.245064		-1.35557	-1.33348	-0.367225		-1.41448	-1.36428	-0.333907	-1.34784	-1.30993	-0.405163
277	0.426576	1.17789	0.39535		-0.919953	-1.20183	-0.770679		-0.91708	-1.24499	-0.761361	-0.935766	-1.20634	-0.79134
278	1.15006	0.275878	0.150078		-1.33217	-1.08121	-0.521564		-1.34747	-1.06853	-0.518684	-1.34753	-1.12634	-0.507872
279	0.41094	1.26502	0.324859		-0.965014	-1.24134	-0.689757		-0.941086	-1.27183	-0.669024	-0.982311	-1.23581	-0.709637
280	1.14826	1.3035	0.2271		-1.3716	-1.39013	-0.318531		-1.37839	-1.39895	-0.272821	-1.35509	-1.37472	-0.357502
281	0.415018	1.12382	0.924693		-0.673301	-1.05901	-1.18266		-0.627603	-1.11643	-1.22047	-0.703772	-1.0619	-1.19433
282	0.38898	0.274611	1.34655		-0.891207	-0.710493	-1.61578		-0.822665	-0.646107	-1.64012	-0.904998	-0.707576	-1.58674
283	1.10791	0.808128	0.692508		-1.11213	-1.00509	-0.848559		-1.11021	-0.981613	-0.833027	-1.105	-1.00528	-0.876157
284	0.343923	0.298544	1.3158		-0.848144	-0.773711	-1.61804		-0.872071	-0.7868	-1.70486	-0.866515	-0.786363	-1.57692
285	0.978606	1.23485	0.350184		-1.23521	-1.28509	-0.488223		-1.23661	-1.29863	-0.432003	-1.23334	-1.2884	-0.513895
286	1.21877	1.29982	0.777312		-1.09494	-1.11525	-0.762037		-1.09051	-1.08647	-0.697911	-1.0903	-1.11499	-0.796006
287	0.37136	1.15662	0.551468		-0.760944	-1.12923	-0.972318		-0.770037	-1.17649	-0.929399	-0.764917	-1.12188	-1.0141
288	1.27416	0.970495	0.805528		-1.10901	-1.01686	-0.842221		-1.12786	-1.02967	-0.844071	-1.11753	-1.0298	-0.854625
289	0.225917	1.04067	0.165629		-0.972366	-1.27985	-0.628953		-1.0158	-1.31794	-0.612413	-1.01691	-1.29491	-0.627098
290	1.05536	0.494105	0.36061		-1.21979	-1.01425	-0.697468		-1.27678	-1.02731	-0.686048	-1.22181	-1.01565	-0.724795
291	1.00846	0.815997	1.29636		-0.976413	-0.884081	-1.18285		-1.00816	-0.86379	-1.20839	-0.985875	-0.877328	-1.20554
292	0.334238	0.387623	1.27881		-0.782983	-0.860013	-1.57286		-0.709985	-0.74135	-1.56365	-0.78517	-0.862154	-1.55342
293	0.665455	1.24586	0.567632		-0.978119	-1.17058	-0.787773		-0.967536	-1.22073	-0.780089	-0.983623	-1.16796	-0.812031
294	1.16227	0.286282	0.197789		-1.28526	-0.998404	-0.612967		-1.31585	-1.01309	-0.588377	-1.29915	-1.0154	-0.635516
295	1.16954	0.921869	0.134648		-1.45846	-1.43224	-0.23665		-1.48518	-1.45362	-0.197016	-1.44185	-1.42071	-0.265695
296	1.09686	0.295438	0.354908		-1.17686	-0.810912	-0.854743		-1.20758	-0.775836	-0.856559	-1.17611	-0.832851	-0.876562
297	0.115206	1.28844	1.03108		-0.230586	-0.962063	-1.48973		-0.164013	-0.944703	-1.52768	-0.263162	-0.974468	-1.47751
298	1.26407	1.14928	0.542855		-1.19267	-1.1673	-0.621286		-1.25262	-1.20226	-0.579851	-1.18372	-1.17066	-0.651169
299	0.386569	0.903796	0.520139		-0.824448	-1.11821	-0.968354		-0.836358	-1.12944	-0.953209	-0.830936	-1.11702	-0.998778
300	0.588965	1.17679	0.915107		-0.809554	-1.07472	-1.0666		-0.815916	-1.12035	-1.11331	-0.787777	-1.05708	-1.11412
301	1.34902	0.993951	0.859932		-1.10799	-1.00362	-0.855359		-1.20199	-1.07191	-0.846438	-1.1145	-1.01896	-0.875656
302	1.45286	1.16625	0.356177		-1.31713	-1.27451	-0.435245		-1.32799	-1.27909	-0.367871	-1.30274	-1.25652	-0.484204
303	0.942061	1.23329	0.244848		-1.31324	-1.35894	-0.37769		-1.30032	-1.35941	-0.353035	-1.32317	-1.36821	-0.384103
304	1.26963	1.22728	0.771359		-1.11056	-1.09983	-0.762143		-1.12568	-1.12667	-0.724213	-1.1073	-1.09493	-0.787464
305	0.459775	0.342662	1.1812		-0.904756	-0.756766	-1.50939		-0.825294	-0.69906	-1.54283	-0.911828	-0.767994	-1.48366
306	1.18685	0.347594	0.385041		-1.18604	-0.844623	-0.826908		-1.22883	-0.841926	-0.809786	-1.18365	-0.867167	-0.844322
307	1.52352	0.475032	0.522773		-1.18278	-0.851956	-0.83071		-1.23073	-0.821686	-0.800733	-1.16862	-0.866496	-0.872536
308	1.23275	0.310047	0.501891		-1.13043	-0.708608	-0.982219		-1.15598	-0.678073	-0.990339	-1.12886	-0.724618	-1.00302
309	0.577403	1.14479	1.29395		-0.73059	-1.02266	-1.24443		-0.698674	-1.08873	-1.30538	-0.76497	-1.0265	-1.23914
310	1.37111	0.41675	1.00315		-1.06364	-0.62316	-1.18571		-1.0941	-0.544953	-1.25139	-1.07137	-0.6735	-1.17476
311	0.681012	1.35887	0.530096		-0.999661	-1.19789	-0.735814		-1.03282	-1.27843	-0.687974	-1.00915	-1.18852	-0.775345
312	1.28391	0.806278	0.414078		-1.24856	-1.13341	-0.591154		-1.28679	-1.11228	-0.597671	-1.24911	-1.15304	-0.605035
313	1.17092	0.44438	1.38058		-1.01857	-0.609993	-1.33361		-0.982035	-0.551192	-1.38011	-1.02286	-0.642538	-1.34221
314	0.269952	1.33048	0.258044		-0.873083	-1.23221	-0.733123		-0.867228	-1.25198	-0.702056	-0.891724	-1.22175	-0.763226
315	1.08331	0.241506	1.25053		-0.999526	-0.420494	-1.43652		-1.01011	-0.342122	-1.47379	-1.00949	-0.466365	-1.41803
316	0.271123	0.203705	1.09589		-0.871989	-0.72128	-1.65109		-0.803401	-0.704538	-1.65489	-0.880802	-0.702284	-1.64059
317	0.403111	1.37309	0.135509		-1.23899	-1.4084	-0.375156		-1.27299	-1.44464	-0.333701	-1.24043	-1.40156	-0.401986
318	1.25662	0.719941	0.654287		-1.14707	-0.966801	-0.829728		-1.2523	-1.00158	-0.808554	-1.14018	-0.98242	-0.857155
319	0.67911	0.500653	1.44024		-0.92405	-0.77491	-1.43623		-0.93073	-0.778457	-1.50768	-0.933306	-0.792827	-1.41803
320	0.341872	1.10962	0.373798		-0.852967	-1.18475	-0.826545		-0.839424	-1.22135	-0.799346	-0.8625	-1.18991	-0.852733
321	0.868952	1.32126	0.383202		-1.17708	-1.27319	-0.537916		-1.14888	-1.27457	-0.506192	-1.16855	-1.27286	-0.572719
322	1.31657	0.438213	0.404546		-1.20999	-0.914891	-0.759307		-1.25276	-0.889976	-0.760863	-1.2111	-0.938984	-0.776916
323	1.34646	0.20935	1.02537		-1.00732	-0.377351	-1.37411		-1.01309	-0.330495	-1.37969	-1.01864	-0.413037	-1.36292
324	0.430312	1.3827	1.26893		-0.581579	-1.0384	-1.27726		-0.505682	-1.06326	-1.35058	-0.629308	-1.04624	-1.26102
325	0.225856	0.246822	1.2957		-0.77096	-0.81899	-1.69331		-0.825313	-0.890548	-1.78643	-0.786756	-0.831202	-1.66788
326	1.33208	0.747249	0.921184		-1.09474	-0.883583	-0.974479		-1.16662	-0.898915	-0.989441	-1.0998	-0.895851	-0.991629
327	0.29986	1.18231	0.315743		-0.85119	-1.20391	-0.790853		-0.829967	-1.22321	-0.796323	-0.857065	-1.20621	-0.823464
328	0.840238	0.224702	1.05804		-1.00204	-0.46859	-1.432		-0.952391	-0.428265	-1.49859	-1.00252	-0.459251	-1.44753
329	0.583053	1.21376	0.658227		-0.887658	-1.13368	-0.903088		-0.873807	-1.17835	-0.936226	-0.895122	-1.14891	-0.917342
330	1.20698	0.205841	0.288305		-1.16872	-0.726804	-0.885251		-1.18904	-0.723148	-0.854557	-1.16571	-0.722214	-0.915219
331	0.725426	1.11953	0.61332		-0.997832	-1.13906	-0.818179		-1.01973	-1.23564	-0.804824	-1.00671	-1.13357	-0.844569
332	0.286245	0.323366	1.13081		-0.78676	-0.850562	-1.58773		-0.833146	-0.934931	-1.70525	-0.805306	-0.86582	-1.57552
333	1.10138	0.248483	0.38942		-1.1405	-0.708734	-0.956603		-1.16808	-0.700468	-0.964046	-1.12968	-0.696971	-1.01669
334	0.474756	1.06939	0.619552		-0.837724	-1.11886	-0.959776		-0.837955	-1.15095	-0.958924	-0.847762	-1.12257	-0.988803
335	0.81494	0.194355	0.949146		-1.00255	-0.441397	-1.42703		-1.02162	-0.373303	-1.47229	-1.00178	-0.464333	-1.43433
336	1.19623	0.254684	0.21441		-1.25437	-0.921556	-0.68333		-1.26692	-0.904012	-0.677243	-1.25793	-0.932028	-0.708206
337	0.327176	0.400156	1.23653		-0.770878	-0.874792	-1.55941		-0.779048	-0.890531	-1.61876	-0.772726	-0.889005	-1.54987
338	1.23767	0.512877	0.794112		-1.09928	-0.782178	-1.03064		-1.0881	-0.776906	-1.04976	-1.10565	-0.767336	-1.06317
339	0.648969	0.502707	1.07966		-0.945181	-0.826051	-1.31853		-0.884199	-0.781925	-1.33722	-0.945169	-0.817688	-1.31569
340	0.169932	1.10791	0.966282		-0.349943	-0.995316	-1.41953		-0.357059	-1.03056	-1.33834	-0.365982	-0.993348	-1.44435
341	0.341945	1.17118	1.31866		-0.518349	-1.01516	-1.37417		-0.472312	-1.03691	-1.41416	-0.545688	-1.01713	-1.37691
342	0.347022	0.977505	1.19162		-0.578066	-1.01407	-1.36244		-0.541138	-1.05855	-1.42283	-0.604668	-1.0185	-1.35933
343	0.153327	0.972743	0.265379		-0.649216	-1.13493	-0.971371		-0.639022	-1.14908	-0.958822	-0.658234	-1.14047	-0.996061
344	1.30196	0.366802	0.40441		-1.18943	-0.843149	-0.820836		-1.21766	-0.830179	-0.788659	-1.17999	-0.849916	-0.863311
345	1.2229	0.337507	0.290505		-1.23667	-0.926482	-0.711084		-1.26105	-0.955132	-0.660012	-1.2409	-0.920104	-0.74563
346	0.298358	0.335449	1.19432		-0.78689	-0.848303	-1.59268		-0.731543	-0.790042	-1.62792	-0.802557	-0.857324	-1.56699
347	0.353846	1.27513	0.387047		-0.844573	-1.19173	-0.815885		-0.813581	-1.21185	-0.805039	-0.844417	-1.18674	-0.847554
348	1.12381	1.15705	0.92318		-1.03893	-1.04936	-0.893274		-0.970156	-0.975952	-0.907883	-1.05212	-1.04909	-0.901953
349	1.33856	1.31883	1.07697		-1.0466	-1.04127	-0.893842		-1.15428	-1.16557	-0.887545	-1.05645	-1.05616	-0.905349
350	0.977718	1.16022	1.28597		-0.92568	-0.996702	-1.09733		-0.950546	-1.01635	-1.01189	-0.995516	-1.00816	-1.04088
351	1.09835	0.514149	0.636763		-1.12102	-0.858893	-0.943424		-1.15953	-0.86243	-0.916889	-1.12357	-0.855597	-0.982415
352	1.04339	0.447936	1.28857		-1.01447	-0.650058	-1.32432		-1.01316	-0.604963	-1.3972	-1.00324	-0.661001	-1.33644
353	1.03202	0.297351	1.29825		-1.00516	-0.495188	-1.41752		-0.998706	-0.44109	-1.45863	-1.00994	-0.522977	-1.41265
354	1.26022	0.51854	0.560246		-1.16071	-0.883604	-0.857779		-1.2335	-0.870588	-0.805063	-1.14842	-0.897048	-0.888834
355	1.1834	0.996282	1.13379		-1.02281	-0.954864	-1.02328		-1.11355	-1.03327	-1.04372	-1.02904	-0.964601	-1.03026
356	0.238951	1.11719	0.227581		-0.876898	-1.23074	-0.73496		-0.877921	-1.25143	-0.703416	-0.893459	-1.23258	-0.748699
357	0.263445	0.231744	1.29502		-0.83084	-0.762146	-1.68243		-0.712488	-0.64555	-1.68099	-0.834563	-0.761245	-1.64602
358	1.03755	1.02466	0.137437		-1.44344	-1.44199	-0.240316		-1.45516	-1.46297	-0.235616	-1.46186	-1.44537	-0.242678
359	0.296341	0.409644	1.25249		-0.729265	-0.895704	-1.57455		-0.699869	-0.830515	-1.59941	-0.723818	-0.906335	-1.54065
360	0.246522	1.03652	1.38928		-0.419885	-0.992093	-1.47246		-0.36616	-0.953759	-1.53308	-0.455756	-0.99985	-1.45765
361	0.922355	0.26053	1.24694		-0.998748	-0.47713	-1.44618		-0.985474	-0.442414	-1.52725	-0.998083	-0.488304	-1.44756
362	0.439822	0.320362	1.20784		-0.902651	-0.741842	-1.53731		-0.90196	-0.744402	-1.57712	-0.914255	-0.740639	-1.51733
363	1.27691	0.727752	1.22474		-1.04218	-0.812718	-1.1322		-1.11518	-0.815771	-1.19654	-1.04599	-0.838058	-1.13154
364	0.389002	0.506803	1.25406		-0.771088	-0.903727	-1.48992		-0.808814	-0.996659	-1.53382	-0.759094	-0.92157	-1.49322
365	0.426823	1.10183	0.464305		-0.875414	-1.16584	-0.852464		-0.868852	-1.20943	-0.858382	-0.892664	-1.17101	-0.868845
366	1.04612	1.23617	0.296237		-1.29245	-1.32373	-0.418072		-1.33129	-1.38986	-0.353934	-1.28646	-1.31365	-0.445715
367	1.20501	0.404176	0.3003		-1.25079	-0.987734	-0.666688		-1.28027	-0.964716	-0.646587	-1.2458	-0.996403	-0.695726
368	0.954344	0.657731	1.3469		-0.978179	-0.81029	-1.26952		-0.939318	-0.78212	-1.27902	-0.999384	-0.806741	-1.27833
369	1.18554	0.485777	1.03903		-1.05433	-0.700934	-1.18224		-1.11953	-0.662524	-1.21636	-1.06058	-0.715491	-1.19971
370	1.21261	0.367195	0.560672		-1.12899	-0.74607	-0.977512		-1.15267	-0.746353	-0.962433	-1.13099	-0.745106	-1.00246
371	0.531454	1.48741	0.47775		-0.928827	-1.2088	-0.755507		-0.911318	-1.26397	-0.723799	-0.94141	-1.19268	-0.790644
372	0.234187	0.276624	1.33063		-0.750765	-0.840177	-1.68136		-0.698139	-0.773423	-1.7035	-0.757317	-0.846585	-1.64713
373	1.30494	0.840142	0.937027		-1.08742	-0.92627	-0.952584		-1.18412	-0.94329	-0.913831	-1.08573	-0.931366	-0.976865
374	0.26814	1.23787	0.255497		-0.877387	-1.23012	-0.735977		-0.880296	-1.26099	-0.720094	-0.886102	-1.22488	-0.770018
375	0.251837	1.37311	0.317862		-0.767604	-1.18481	-0.845158		-0.747426	-1.20315	-0.811368	-0.782475	-1.17066	-0.886771
376	0.358771	0.304652	1.03141		-0.873871	-0.790403	-1.52781		-0.955924	-0.837888	-1.5999	-0.879231	-0.815317	-1.52552
377	0.261253	0.310687	1.02925		-0.774265	-0.864444	-1.57817		-0.758769	-0.873003	-1.6438	-0.779666	-0.88443	-1.53768
378	0.475902	1.25992	0.376211		-0.974517	-1.22813	-0.705535		-0.970144	-1.28104	-0.667429	-0.992519	-1.21922	-0.737234
379	1.01739	0.216412	0.337451		-1.14362	-0.705429	-0.948946		-1.16422	-0.684005	-0.937799	-1.14572	-0.718095	-0.97296
380	0.402954	0.559428	1.41931		-0.745846	-0.910738	-1.51067		-0.687736	-0.84488	-1.54273	-0.742771	-0.921112	-1.47902
381	0.556741	0.423159	1.20826		-0.917623	-0.782919	-1.4396		-0.913974	-0.758633	-1.51002	-0.930169	-0.793316	-1.41539
382	0.949613	0.219978	0.421985		-1.108	-0.648706	-1.04933		-1.13235	-0.663851	-0.999105	-1.10711	-0.66427	-1.07283
383	0.761936	0.712456	1.1824		-0.930479	-0.900134	-1.23942		-0.83193	-0.823058	-1.24426	-0.941961	-0.91119	-1.23666
384	1.34556	0.258763	0.285134		-1.2079	-0.818974	-0.789808		-1.2335	-0.812571	-0.785844	-1.20689	-0.839907	-0.811474
385	1.3246	0.238082	0.981331		-1.0218	-0.428163	-1.3313		-1.05141	-0.415309	-1.29192	-1.03075	-0.46745	-1.32642
386	0.899491	1.52285	1.12601		-0.886716	-1.08314	-0.992427		-0.910523	-1.20519	-0.985478	-0.904412	-1.08484	-1.0103
387	0.981152	1.48865	0.701337		-1.04432	-1.17005	-0.742609		-1.12128	-1.27345	-0.731236	-1.05916	-1.17669	-0.759718
388	1.39442	0.598809	1.14873		-1.06377	-0.734169	-1.13963		-1.15173	-0.707491	-1.1573	-1.0639	-0.76915	-1.14334
389	1.20735	1.2771	0.673996		-1.12734	-1.14391	-0.702487		-1.14806	-1.14475	-0.645212	-1.1175	-1.14705	-0.734341
390	1.26162	1.11993	1.3621		-0.996601	-0.947931	-1.07013		-1.04798	-0.995361	-1.08879	-1.00161	-0.959031	-1.07218
391	0.376844	1.03226	0.693478		-0.718248	-1.08601	-1.09189		-0.736237	-1.13577	-1.0437	-0.716255	-1.08555	-1.13567
392	0.370778	0.462346	1.14885		-0.78587	-0.896603	-1.48338		-0.775646	-0.844755	-1.52083	-0.800355	-0.906605	-1.46128
393	1.41764	0.609161	0.498414		-1.20784	-0.972789	-0.736435		-1.2712	-0.983757	-0.693603	-1.19607	-0.979312	-0.772594
394	1.32868	0.355898	0.968415		-1.05539	-0.574632	-1.2202		-1.08154	-0.514308	-1.26322	-1.06097	-0.618484	-1.21354
395	1.31301	0.993308	0.72802		-1.13652	-1.04761	-0.781072		-1.21656	-1.05017	-0.775888	-1.13639	-1.06379	-0.794682
396	0.372256	1.01243	0.304791		-0.961265	-1.22395	-0.717727		-0.960765	-1.27568	-0.714224	-0.984321	-1.22656	-0.731524
397	0.540635	1.10717	1.24266		-0.719096	-1.02409	-1.2496		-0.698693	-1.11607	-1.31866	-0.770404	-1.02397	-1.23712
398	0.370018	0.318352	0.952995		-0.881517	-0.805912	-1.48405		-0.85766	-0.828451	-1.53241	-0.886377	-0.795124	-1.51653
399	0.245467	0.265404	1.01698		-0.793766	-0.835034	-1.60959		-0.766592	-0.848051	-1.64267	-0.776888	-0.827167	-1.62482
400	0.841991	1.11702	1.32626		-0.87394	-0.995122	-1.16179		-0.881249	-0.981791	-1.17803	-0.874638	-0.998649	-1.18266
401	0.500305	0.391841	1.15637		-0.907086	-0.785933	-1.45928		-0.788432	-0.71899	-1.46668	-0.915534	-0.775387	-1.44704
402	1.26169	0.948612	0.747494		-1.12267	-1.02876	-0.814325		-1.20084	-1.06736	-0.83949	-1.1388	-1.03825	-0.832027
403	1.07938	0.800722	1.43613		-0.97966	-0.847374	-1.22237		-0.94098	-0.805801	-1.23939	-1.00173	-0.855947	-1.21636
404	0.509075	1.15454	0.395459		-0.99078	-1.21485	-0.716878		-1.00647	-1.27441	-0.703683	-1.00588	-1.21559	-0.739964
405	1.39535	0.440436	0.524432		-1.16785	-0.827556	-0.867958		-1.20922	-0.793234	-0.868311	-1.16447	-0.839654	-0.895107
406	0.987473	0.250027	1.09081		-1.01002	-0.470552	-1.39707		-0.982082	-0.41193	-1.46385	-1.01333	-0.4836	-1.39233
407	1.11289	0.513937	0.727537		-1.1005	-0.821168	-1.00606		-1.13618	-0.839838	-0.974266	-1.07397	-0.796502	-1.06439
408	0.204103	1.2142	1.37256		-0.337785	-0.983724	-1.47798		-0.286397	-0.963464	-1.52381	-0.391614	-0.995074	-1.45078
409	1.08675	0.60734	0.55927		-1.14865	-0.960742	-0.831567		-1.22919	-0.979397	-0.791287	-1.14451	-0.98049	-0.84602
410	1.34111	0.354611	0.803022		-1.07901	-0.618259	-1.13878		-1.09914	-0.592192	-1.1624	-1.08784	-0.642039	-1.14764
411	0.314202	0.385531	1.11008		-0.776289	-0.881004	-1.53542		-0.811999	-0.944596	-1.61064	-0.770513	-0.897466	-1.5342
412	0.627728	0.773232	1.33143		-0.837229	-0.935038	-1.32342		-0.79861	-0.899399	-1.37204	-0.848857	-0.938248	-1.31581
413	1.22653	0.825176	0.653272		-1.14504	-1.01851	-0.794135		-1.24455	-1.06065	-0.764291	-1.14994	-1.02847	-0.816976
414	1.14101	1.21415	0.607218		-1.13878	-1.15662	-0.679781		-1.1271	-1.13908	-0.661722	-1.14392	-1.15451	-0.696316
415	1.34304	0.406383	0.459796		-1.17999	-0.840344	-0.839931		-1.21446	-0.805254	-0.82731	-1.17906	-0.854888	-0.857136
416	0.295306	0.335445	1.26999		-0.778911	-0.846096	-1.61299		-0.771071	-0.828688	-1.67496	-0.789325	-0.850476	-1.58948
417	1.1433	0.506014	0.43496		-1.19484	-0.959863	-0.762616		-1.26244	-1.02132	-0.727567	-1.20669	-0.995286	-0.768457
418	1.05677	1.22703	1.24663		-0.950233	-1.01025	-1.04713		-0.884663	-0.928275	-1.03457	-0.954408	-1.01424	-1.05438
419	0.57067	0.412381	1.25324		-0.923239	-0.763433	-1.45446		-0.84589	-0.708098	-1.47111	-0.931	-0.762414	-1.43943
420	1.28547	1.15137	0.987905		-1.06229	-1.02283	-0.895342		-1.01718	-0.987646	-0.941684	-1.07607	-1.0373	-0.896731
421	0.655793	1.05889	1.00814		-0.846311	-1.0408	-1.10513		-0.84324	-1.14492	-1.14073	-0.859074	-1.06861	-1.12798
422	1.06426	0.217115	1.26765		-0.992171	-0.387687	-1.46173		-0.989351	-0.294215	-1.51331	-1.00528	-0.443579	-1.43733
423	0.574555	1.13228	1.29408		-0.730823	-1.02116	-1.24802		-0.71184	-1.01707	-1.31588	-0.757009	-1.01984	-1.24408
424	1.26579	0.509385	0.39951		-1.2233	-0.981391	-0.709482		-1.26433	-0.973305	-0.681886	-1.22114	-0.992385	-0.734392
425	0.558971	0.41163	1.04564		-0.937404	-0.791002	-1.3831		-0.887487	-0.7392	-1.42	-0.946555	-0.794996	-1.37695
426	0.835705	1.30835	0.652712		-1.01789	-1.15775	-0.777945		-1.00838	-1.23216	-0.773002	-1.02901	-1.16125	-0.796808
427	0.354081	0.220835	0.968089		-0.923363	-0.685782	-1.55959		-0.954327	-0.688651	-1.59198	-0.939686	-0.686531	-1.53904
428	1.2912	0.499779	0.428312		-1.21027	-0.950288	-0.743748		-1.27008	-0.93869	-0.709735	-1.19802	-0.967475	-0.779369
429	0.997924	0.361948	0.274391		-1.24013	-0.985643	-0.683051		-1.28658	-1.02896	-0.657889	-1.25778	-1.04112	-0.671729
430	0.216224	1.17438	0.908411		-0.427375	-1.01965	-1.34097		-0.436351	-1.01485	-1.34867	-0.431002	-1.0256	-1.35005
431	1.2744	1.20956	1.46068		-0.979139	-0.957583	-1.08317		-0.987383	-0.967467	-1.08988	-0.992311	-0.965027	-1.09166
432	0.713938	1.39003	0.923642		-0.859326	-1.10047	-0.981421		-0.868506	-1.16587	-0.99098	-0.86159	-1.09714	-1.01071
433	0.164879	1.03831	0.826647		-0.375467	-1.00518	-1.38408		-0.363053	-1.01516	-1.37836	-0.378762	-1.01208	-1.39954
434	0.237254	1.27719	0.311922		-0.753893	-1.17718	-0.863656		-0.745838	-1.19343	-0.845419	-0.761777	-1.17646	-0.892254
435	1.09361	0.358249	0.626022		-1.1025	-0.716813	-1.05094		-1.163	-0.686988	-1.04246	-1.11357	-0.750698	-1.07104
436	0.49122	1.26042	0.533884		-0.876304	-1.16538	-0.852879		-0.880154	-1.2118	-0.850172	-0.894376	-1.17188	-0.870786
437	0.827076	1.19874	0.602826		-1.04238	-1.15706	-0.760188		-1.06136	-1.21396	-0.74802	-1.04321	-1.15952	-0.786933
438	0.844551	0.688886	1.26183		-0.953401	-0.861007	-1.25486		-0.933676	-0.845228	-1.27586	-0.958298	-0.866509	-1.25382
439	0.325319	1.18456	1.30288		-0.500116	-1.01446	-1.37854		-0.434145	-1.02519	-1.42864	-0.547022	-1.02863	-1.35546
440	0.253709	1.36985	1.24228		-0.400181	-1.00629	-1.39394		-0.334554	-1.00622	-1.4231	-0.443731	-1.01502	-1.38362
441	1.16519	0.274903	0.466769		-1.12583	-0.687534	-0.996861		-1.15586	-0.691663	-0.961695	-1.12621	-0.685017	-1.02771
442	1.11992	0.317672	0.401415		-1.16486	-0.798677	-0.882961		-1.20294	-0.792655	-0.844012	-1.15993	-0.806351	-0.917209
443	0.456187	1.14803	1.06093		-0.676754	-1.0468	-1.21526		-0.623827	-1.0914	-1.29069	-0.718023	-1.05688	-1.20809
444	1.25329	1.0332	1.05502		-1.04867	-0.975847	-0.963182		-0.983837	-0.927034	-0.953073	-1.05533	-0.977537	-0.979227
445	1.26384	0.295167	1.50325		-0.999847	-0.431286	-1.43774		-0.995411	-0.339761	-1.49671	-1.00969	-0.477486	-1.42056
446	0.949332	0.531424	1.20387		-1.00519	-0.749926	-1.27129		-1.0086	-0.723735	-1.34443	-0.994666	-0.747281	-1.29763
447	1.16022	0.353471	0.416218		-1.17241	-0.827918	-0.858798		-1.20091	-0.78497	-0.861737	-1.17441	-0.835333	-0.886453
448	1.48996	0.539728	0.469643		-1.21377	-0.940479	-0.742643		-1.26714	-0.929521	-0.724347	-1.21271	-0.975872	-0.761549
449	0.427959	1.51993	1.04817		-0.607226	-1.06571	-1.18201		-0.543468	-1.09862	-1.2146	-0.652701	-1.0719	-1.17447
450	1.42559	1.17124	0.556946		-1.21406	-1.16313	-0.604609		-1.21293	-1.1512	-0.551447	-1.20908	-1.16627	-0.633375
451	1.01268	0.209115	0.458099		-1.09285	-0.59816	-1.09517		-1.10086	-0.59027	-1.10478	-1.09557	-0.568738	-1.14849
452	1.09934	0.220457	0.262711		-1.19215	-0.793215	-0.826279		-1.21377	-0.807595	-0.764474	-1.18774	-0.790707	-0.8602
453	1.39002	0.375433	0.512784		-1.15451	-0.769134	-0.912962		-1.17446	-0.757833	-0.910599	-1.15739	-0.792058	-0.93125
454	1.10009	0.517726	0.41598		-1.2002	-0.985328	-0.740834		-1.25497	-0.994688	-0.718508	-1.1985	-1.01333	-0.755353
455	1.13794	1.00932	1.28121		-0.989203	-0.939506	-1.09176		-0.995877	-0.929612	-1.12643	-0.99001	-0.943565	-1.11343
456	0.752871	0.61068	1.5614		-0.91317	-0.811334	-1.4069		-0.975665	-0.835189	-1.52154	-0.927435	-0.834843	-1.38262
457	0.334132	0.352705	1.19274		-0.8111	-0.839297	-1.56594		-0.760093	-0.76573	-1.58827	-0.811326	-0.850855	-1.54563
458	1.25912	0.853951	1.0799		-1.05462	-0.903497	-1.02687		-1.04216	-0.873082	-1.04402	-1.05574	-0.90379	-1.06217
459	0.641499	1.29604	0.834032		-0.853038	-1.10505	-0.977013		-0.854965	-1.13963	-0.948448	-0.85569	-1.10302	-1.00116
460	0.247383	0.226006	1.19303		-0.823522	-0.775211	-1.67372		-0.826559	-0.777824	-1.73143	-0.823118	-0.768833	-1.64669
461	1.40522	0.843691	0.61926		-1.18154	-1.03027	-0.738173		-1.24088	-1.05176	-0.687127	-1.19227	-1.04167	-0.765471
462	0.596474	1.12777	0.766714		-0.864951	-1.09708	-0.983797		-0.826173	-1.07082	-1.02952	-0.856655	-1.09788	-1.02392
463	0.37235	1.19728	1.02953		-0.595117	-1.04561	-1.24982		-0.526113	-1.09168	-1.30136	-0.637854	-1.04202	-1.24779
464	1.17181	1.04583	0.221601		-1.37455	-1.35689	-0.338626		-1.4288	-1.40223	-0.289275	-1.36473	-1.3425	-0.369788
465	0.419672	1.28014	1.12818		-0.610459	-1.04544	-1.24629		-0.596212	-1.10341	-1.23429	-0.625722	-1.04631	-1.2581
466	1.05237	0.512977	0.833531		-1.07167	-0.794605	-1.08342		-1.18865	-0.797661	-1.07224	-1.06631	-0.801843	-1.11593
467	1.24026	0.320264	0.387594		-1.17795	-0.805101	-0.85393		-1.20857	-0.801514	-0.807294	-1.16698	-0.804802	-0.896989
468	0.286519	0.242729	1.28595		-0.843526	-0.75518	-1.6645		-0.863098	-0.77891	-1.71819	-0.850258	-0.75656	-1.65217
469	0.304553	0.228983	1.1307		-0.876743	-0.727398	-1.62805		-0.89312	-0.724503	-1.67207	-0.904698	-0.733803	-1.57908
470	0.115386	1.27946	0.93338		-0.244287	-0.968038	-1.46724		-0.193439	-0.949468	-1.51893	-0.28615	-0.985175	-1.44035
471	0.998382	1.257	0.52899		-1.13411	-1.19691	-0.643962		-1.15674	-1.22728	-0.588489	-1.12342	-1.17198	-0.722804
472	1.29754	0.573869	0.747959		-1.11958	-0.837661	-0.958487		-1.17791	-0.835001	-0.950659	-1.11281	-0.844717	-0.99677
473	1.11612	1.30022	0.831356		-1.05257	-1.10333	-0.816014		-1.03264	-1.08664	-0.824765	-1.06257	-1.11871	-0.825982

## Sheet: Apt
		Aspect ratio				Analytical stress				FEM	CT		FEM	VA
	X	Y	Z		sxx	syy	szz		sxx	syy	szz	sxx	syy	szz
1	0.34546	1.33343	0.30978		-0.870485	-1.19273	-0.799928		-0.833348	-1.19779	-0.731474	-0.856517	-1.1622	-0.79169
2	0.445001	1.34259	0.375745		-0.899582	-1.17869	-0.796527		-0.870955	-1.19879	-0.780479	-0.896032	-1.15083	-0.790663
3	0.389465	0.507128	1.24996		-0.809498	-0.959609	-1.20366		-0.779348	-0.952116	-1.18648	-0.764012	-0.950961	-1.16993
4	0.572327	0.760422	1.33727		-0.838117	-0.989466	-1.16219		-0.82426	-0.967307	-1.14877	-0.81746	-0.979004	-1.13334
5	0.587736	1.15743	1.2996		-0.757176	-1.08326	-1.11662		-0.677644	-1.10535	-1.12536	-0.765675	-1.04573	-1.08047
6	0.562672	1.04327	0.431365		-0.958902	-1.13646	-0.812782		-0.919952	-1.14878	-0.772604	-0.933206	-1.10353	-0.80099
7	0.469297	0.629633	1.03774		-0.842576	-0.996767	-1.1526		-0.823963	-0.95092	-1.13691	-0.814965	-0.968606	-1.10897
8	1.09293	0.379623	0.342347		-1.17498	-0.88939	-0.824711		-1.17427	-0.864565	-0.802517	-1.15268	-0.861809	-0.789271
9	0.323248	0.2797	1.44181		-0.898293	-0.810707	-1.24334		-0.893803	-0.752317	-1.23882	-0.860526	-0.793913	-1.21312
10	0.363608	1.36028	0.288697		-0.899109	-1.19032	-0.75747		-0.86901	-1.20174	-0.73443	-0.893648	-1.16533	-0.731609
11	1.56365	0.384879	0.282152		-1.19254	-0.911725	-0.722531		-1.19128	-0.903934	-0.675655	-1.17015	-0.892676	-0.714046
12	1.26443	0.516333	1.18191		-1.11729	-0.707335	-1.10277		-1.13341	-0.632825	-1.10058	-1.0844	-0.724306	-1.06831
13	1.07667	0.280091	1.16329		-1.1387	-0.51182	-1.14943		-1.14929	-0.458477	-1.16234	-1.11795	-0.54228	-1.1201
14	0.218572	0.255823	1.08225		-0.808797	-0.904038	-1.24091		-0.774375	-0.890342	-1.23479	-0.796472	-0.862094	-1.20957
15	1.03477	1.16401	0.487214		-1.06262	-1.09107	-0.699742		-1.06865	-1.07396	-0.637676	-1.031	-1.06837	-0.702268
16	0.945242	1.24588	0.519351		-1.03475	-1.10561	-0.73338		-1.03741	-1.09963	-0.662506	-1.01052	-1.08234	-0.730153
17	0.273052	0.232534	1.15514		-0.904712	-0.807869	-1.24096		-0.866499	-0.795071	-1.24977	-0.887158	-0.795974	-1.21383
18	1.20581	0.289495	1.01955		-1.15368	-0.527479	-1.12643		-1.16411	-0.474636	-1.13053	-1.1278	-0.538239	-1.10279
19	0.696006	1.00041	1.23416		-0.857867	-1.03362	-1.10406		-0.797899	-1.0358	-1.09262	-0.848564	-1.0027	-1.0695
20	0.983064	1.19329	1.32067		-0.930221	-1.01818	-1.05737		-0.879022	-1.00639	-1.02526	-0.904714	-0.989913	-1.01608
21	0.38508	0.279432	1.14459		-0.960182	-0.773228	-1.22155		-0.916705	-0.786739	-1.22285	-0.94591	-0.762884	-1.19811
22	1.23721	0.712851	1.20729		-1.07868	-0.828248	-1.07317		-1.06867	-0.791496	-1.0557	-1.04903	-0.809762	-1.04943
23	1.26688	0.319929	1.11773		-1.14978	-0.537469	-1.12892		-1.15461	-0.480283	-1.13859	-1.12689	-0.55403	-1.09912
24	1.19161	0.356948	0.326413		-1.18487	-0.875355	-0.817327		-1.19028	-0.827139	-0.793033	-1.16605	-0.862067	-0.794526
25	1.26119	1.12009	1.36213		-1.00923	-0.956697	-1.04028		-0.997431	-0.93133	-1.0144	-0.991468	-0.945183	-1.01279
26	1.25803	0.84907	1.42133		-1.04582	-0.860551	-1.08794		-1.03524	-0.813392	-1.07389	-1.01819	-0.852734	-1.04939
27	0.315279	0.385791	1.27357		-0.808251	-0.927476	-1.22672		-0.787684	-0.893729	-1.23365	-0.793408	-0.920214	-1.18801
28	1.41773	0.609176	0.498357		-1.15867	-0.926484	-0.809932		-1.17139	-0.90453	-0.758981	-1.12766	-0.911122	-0.810054
29	1.31303	0.993302	0.728014		-1.09019	-1.00165	-0.845928		-1.10204	-0.961704	-0.842529	-1.06034	-0.993523	-0.821469
30	0.376079	0.262153	1.03193		-0.973131	-0.764844	-1.21615		-0.910212	-0.772541	-1.2221	-0.96426	-0.736834	-1.17974
31	0.37218	1.01261	0.30476		-0.913402	-1.17161	-0.794413		-0.878802	-1.17631	-0.774246	-0.901647	-1.14341	-0.768065
32	0.370044	0.318303	0.952996		-0.931525	-0.84578	-1.20353		-0.881763	-0.833384	-1.18781	-0.896793	-0.797741	-1.17537
33	0.245448	0.265401	1.01722		-0.841528	-0.888424	-1.23369		-0.812956	-0.855817	-1.22116	-0.78932	-0.856531	-1.20602
34	0.350534	1.27445	0.279123		-0.900047	-1.18901	-0.760473		-0.883903	-1.19281	-0.697104	-0.883249	-1.16637	-0.761192
35	0.40146	1.1435	0.317791		-0.916657	-1.17501	-0.77751		-0.877037	-1.18532	-0.787511	-0.899451	-1.15395	-0.753705
36	0.653692	1.03891	0.792159		-0.901153	-1.0874	-0.992931		-0.889149	-1.08964	-0.954598	-0.882962	-1.05067	-0.97328
37	1.25912	0.910839	1.53247		-1.0289	-0.873506	-1.09676		-0.990041	-0.870227	-1.07448	-1.01062	-0.845442	-1.07424
38	1.39533	0.440471	0.524389		-1.17738	-0.818299	-0.911981		-1.19206	-0.765981	-0.885228	-1.14897	-0.799139	-0.891111
39	0.987742	0.282216	1.09101		-1.13296	-0.541896	-1.14894		-1.12876	-0.487626	-1.16699	-1.11126	-0.530683	-1.11723
40	1.30113	1.12774	0.808514		-1.06704	-1.02011	-0.86077		-1.05128	-0.99765	-0.843296	-1.04119	-0.997774	-0.833084
41	1.11282	0.513959	0.727537		-1.12859	-0.825151	-1.00189		-1.11223	-0.830886	-0.96922	-1.09124	-0.786245	-1.00459
42	1.08677	0.607285	0.559292		-1.1244	-0.932306	-0.885556		-1.13544	-0.913665	-0.856362	-1.08911	-0.931179	-0.855883
43	0.602414	1.1175	0.344414		-1.00105	-1.14274	-0.698196		-0.96668	-1.14444	-0.683936	-0.994061	-1.09853	-0.666189
44	0.767748	1.38111	0.696902		-0.934176	-1.12581	-0.87966		-0.919536	-1.1209	-0.834976	-0.913418	-1.10429	-0.868079
45	0.764805	1.19368	1.07135		-0.879676	-1.07233	-1.0371		-0.847307	-1.06165	-1.01852	-0.845902	-1.04586	-1.02119
46	0.250168	1.18985	0.197229		-0.889443	-1.1994	-0.741067		-0.864056	-1.20424	-0.745744	-0.876456	-1.18275	-0.732013
47	1.34308	0.406519	0.459741		-1.18171	-0.826847	-0.891747		-1.20054	-0.794427	-0.88159	-1.15919	-0.818313	-0.871578
48	0.295265	0.33551	1.26963		-0.825355	-0.901869	-1.23409		-0.804544	-0.876068	-1.24396	-0.82078	-0.88518	-1.2087
49	1.05679	1.22702	1.24663		-0.955663	-1.02041	-1.02746		-0.939345	-0.987599	-0.998158	-0.938366	-1.00046	-0.998961
50	0.721171	0.988326	1.31499		-0.863682	-1.01939	-1.11495		-0.807194	-1.01197	-1.09972	-0.857336	-0.992057	-1.07426
51	1.34388	1.08616	0.805409		-1.07762	-1.00788	-0.861404		-1.06124	-0.993067	-0.791647	-1.04884	-0.975215	-0.848015
52	0.168473	1.07726	1.16051		-0.349042	-1.15242	-1.15335		-0.308929	-1.14474	-1.17579	-0.367943	-1.14151	-1.13298
53	0.783663	1.17811	1.23825		-0.866786	-1.05412	-1.07264		-0.848818	-1.02819	-1.04318	-0.841081	-1.02662	-1.04325
54	1.26578	0.509376	0.399647		-1.16493	-0.928694	-0.787228		-1.17918	-0.89821	-0.765162	-1.13743	-0.913009	-0.772318
55	0.558964	0.411623	1.04563		-0.988436	-0.823033	-1.17267		-0.955817	-0.79273	-1.17406	-0.975412	-0.800437	-1.14006
56	0.606905	0.57519	1.24156		-0.929561	-0.900571	-1.16878		-0.895923	-0.871238	-1.17075	-0.920436	-0.885365	-1.12989
57	0.968066	1.31608	0.397829		-1.0571	-1.11796	-0.612814		-1.06213	-1.12255	-0.546612	-1.03215	-1.09962	-0.630091
58	1.25052	0.603309	1.18701		-1.10056	-0.767738	-1.08835		-1.10552	-0.70693	-1.07879	-1.07026	-0.773799	-1.0536
59	0.336763	0.281561	1.2188		-0.916896	-0.810383	-1.23239		-0.884321	-0.796601	-1.24224	-0.904919	-0.803071	-1.20688
60	1.20961	0.927563	1.43139		-1.02257	-0.89742	-1.0834		-1.00427	-0.87389	-1.06556	-0.995529	-0.877476	-1.05301
61	1.24336	0.44867	0.27363		-1.17176	-0.964784	-0.680226		-1.19	-0.921652	-0.690928	-1.15164	-0.956323	-0.675854
62	0.69179	1.20281	0.409081		-1.00197	-1.13601	-0.720166		-0.978403	-1.13363	-0.709803	-0.978871	-1.11137	-0.710271
63	1.21539	0.606121	0.31614		-1.14955	-1.0068	-0.652481		-1.15127	-0.983984	-0.642811	-1.13354	-0.984976	-0.639739
64	1.01567	0.220484	0.269804		-1.20015	-0.781778	-0.894474		-1.19907	-0.767976	-0.868169	-1.17511	-0.752887	-0.874041
65	1.2046	1.30476	0.855717		-1.0286	-1.0552	-0.868583		-1.01719	-1.03972	-0.834347	-1.00327	-1.04066	-0.85015
66	0.276881	1.13524	0.257322		-0.858662	-1.19572	-0.808879		-0.811698	-1.20825	-0.791565	-0.84705	-1.17181	-0.798961
67	1.17524	0.292635	0.349146		-1.19337	-0.797939	-0.894893		-1.20432	-0.764011	-0.861912	-1.1613	-0.786136	-0.878307
68	0.771404	0.270544	1.19772		-1.10198	-0.566565	-1.17695		-1.0851	-0.549233	-1.18294	-1.06423	-0.561541	-1.16159
69	0.734375	1.30725	1.20374		-0.829279	-1.08608	-1.0625		-0.810308	-1.08578	-1.02464	-0.821417	-1.05694	-1.03917
70	0.308095	1.41021	0.251743		-0.883049	-1.19878	-0.756115		-0.855509	-1.20087	-0.719351	-0.861105	-1.17465	-0.749154
71	0.455329	0.377169	0.969025		-0.954657	-0.850799	-1.18317		-0.957405	-0.796704	-1.16401	-0.912278	-0.817183	-1.15346
72	0.73423	0.91058	1.25724		-0.892933	-0.999339	-1.11233		-0.873756	-0.972234	-1.09837	-0.869101	-0.981373	-1.08725
73	1.1282	0.656618	0.548859		-1.12333	-0.953066	-0.855658		-1.12562	-0.929287	-0.852052	-1.09498	-0.943673	-0.831937
74	0.52975	1.25334	0.6311		-0.849359	-1.14886	-0.940023		-0.827662	-1.16356	-0.916667	-0.827807	-1.12044	-0.940952
75	1.05043	0.830983	0.657456		-1.07665	-0.997167	-0.881988		-1.02507	-0.999266	-0.804481	-1.01232	-0.988267	-0.828434
76	1.22442	0.257369	0.330568		-1.20104	-0.766578	-0.907682		-1.21074	-0.763488	-0.865436	-1.17745	-0.752586	-0.902949
77	1.33061	0.990689	0.445029		-1.11484	-1.05125	-0.649827		-1.12535	-1.0359	-0.608485	-1.0919	-1.03573	-0.637828
78	0.241171	0.207378	1.08127		-0.899679	-0.808285	-1.24368		-0.876532	-0.79062	-1.23527	-0.870518	-0.781203	-1.21945
79	1.21408	0.888521	1.02021		-1.0612	-0.933385	-0.996755		-1.04206	-0.923001	-0.97307	-1.03108	-0.904054	-0.970947
80	1.11496	1.33279	1.14713		-0.969704	-1.04148	-0.981689		-0.950749	-1.0193	-0.963389	-0.944633	-1.01134	-0.948916
81	0.330166	0.312564	1.33181		-0.879392	-0.846641	-1.23619		-0.854665	-0.81864	-1.24864	-0.871198	-0.839206	-1.20753
82	0.30224	1.15472	0.18669		-0.946965	-1.18625	-0.66174		-0.943462	-1.18021	-0.632006	-0.923916	-1.16862	-0.630999
83	0.464099	0.247424	1.12566		-1.029	-0.674954	-1.2099		-0.989493	-0.672002	-1.21154	-1.00344	-0.663677	-1.17988
84	0.219425	0.260219	1.19434		-0.800149	-0.903954	-1.24496		-0.774282	-0.873634	-1.24446	-0.775328	-0.882996	-1.21242
85	0.318082	1.26794	0.930998		-0.57254	-1.15915	-1.105		-0.531783	-1.17457	-1.09133	-0.568786	-1.13791	-1.07474
86	0.943086	0.775523	1.15506		-1.00809	-0.915659	-1.08309		-0.988423	-0.889247	-1.05233	-0.959196	-0.890976	-1.0431
87	0.449523	1.19863	1.02952		-0.691398	-1.12917	-1.09531		-0.618736	-1.14115	-1.10296	-0.710086	-1.09165	-1.0722
88	1.17142	1.04613	0.22159		-1.10816	-1.09504	-0.405259		-1.11529	-1.09661	-0.356796	-1.09574	-1.07644	-0.424179
89	0.419665	1.28008	1.12817		-0.634883	-1.13685	-1.11193		-0.609927	-1.15565	-1.09078	-0.635723	-1.11866	-1.09501
90	1.05239	0.512978	0.833592		-1.11175	-0.806029	-1.04487		-1.12577	-0.770436	-1.00934	-1.0773	-0.784951	-1.02739
91	1.2403	0.320397	0.387612		-1.191	-0.797153	-0.901814		-1.20042	-0.777328	-0.866995	-1.16032	-0.770311	-0.889417
92	1.14101	0.376759	0.41389		-1.17568	-0.84137	-0.889363		-1.19417	-0.819901	-0.854474	-1.14517	-0.835138	-0.872576
93	1.10463	1.27923	0.697037		-1.03361	-1.0776	-0.810999		-1.01842	-1.06821	-0.766812	-1.00787	-1.05209	-0.794244
94	0.286494	0.242761	1.28581		-0.903454	-0.803133	-1.24389		-0.874092	-0.799566	-1.24428	-0.889704	-0.782732	-1.22255
95	0.305265	0.229564	1.1226		-0.941464	-0.771622	-1.23489		-0.918674	-0.73835	-1.23624	-0.940357	-0.744388	-1.19018
96	0.116683	1.27542	0.933243		-0.265561	-1.16515	-1.13617		-0.209541	-1.16611	-1.1444	-0.296649	-1.15751	-1.11971
97	0.774624	0.707153	1.13913		-0.970871	-0.925691	-1.11258		-0.949222	-0.906133	-1.06204	-0.923473	-0.897294	-1.06092
98	1.29754	0.573866	0.747972		-1.13904	-0.83618	-0.972921		-1.1384	-0.794999	-0.943607	-1.10184	-0.812229	-0.956753
99	0.274583	1.15128	0.258609		-0.854233	-1.19678	-0.812236		-0.842162	-1.20978	-0.776723	-0.8436	-1.17387	-0.797955
100	1.18497	0.290748	0.269251		-1.19546	-0.859907	-0.807906		-1.2113	-0.833772	-0.798147	-1.17534	-0.84589	-0.803854
101	1.16817	0.706044	0.591473		-1.11787	-0.956974	-0.861767		-1.11897	-0.931377	-0.845702	-1.08688	-0.94453	-0.843853
102	1.19098	0.711835	0.807883		-1.10148	-0.9048	-0.965684		-1.0751	-0.889029	-0.94335	-1.06437	-0.886593	-0.940854
103	1.14151	0.336122	0.427144		-1.18111	-0.795862	-0.926982		-1.17559	-0.828038	-0.866254	-1.1563	-0.767024	-0.921219
104	0.387553	1.00705	0.353527		-0.895569	-1.16656	-0.83865		-0.876667	-1.14737	-0.811577	-0.877896	-1.13138	-0.824257
105	0.512779	0.372105	1.34598		-0.967402	-0.783394	-1.21145		-0.925728	-0.785727	-1.20524	-0.964798	-0.736078	-1.18315
106	1.21423	1.16652	0.728987		-1.05861	-1.04618	-0.827013		-1.05477	-1.02961	-0.760131	-1.03411	-1.0202	-0.813838
107	0.594986	1.3591	0.525532		-0.913814	-1.1552	-0.840473		-0.884648	-1.15912	-0.819234	-0.902077	-1.12639	-0.816157
108	1.1547	1.24794	0.327284		-1.0913	-1.10342	-0.510317		-1.09789	-1.11554	-0.429486	-1.07334	-1.08444	-0.535386
109	1.33242	0.359045	0.420651		-1.18893	-0.808605	-0.894474		-1.19811	-0.761663	-0.863498	-1.16055	-0.795007	-0.874
110	0.627189	0.582453	1.43674		-0.923681	-0.882643	-1.18586		-0.902047	-0.860367	-1.17012	-0.92129	-0.834083	-1.14789
111	0.296329	1.10085	1.3524		-0.503576	-1.13105	-1.16023		-0.414666	-1.16741	-1.17208	-0.535245	-1.09708	-1.13718
112	1.33881	0.377721	0.756609		-1.16759	-0.677304	-1.04451		-1.17868	-0.661648	-1.00316	-1.14049	-0.663462	-1.01333
113	1.16711	0.908186	0.738161		-1.07768	-0.991612	-0.889188		-1.06228	-0.973004	-0.871926	-1.04069	-0.978793	-0.866946
114	0.709515	1.31448	0.267664		-1.04363	-1.1416	-0.537976		-1.02726	-1.15066	-0.489175	-1.00521	-1.12548	-0.544094
115	1.19977	0.637881	0.781922		-1.1159	-0.873995	-0.975227		-1.1226	-0.839084	-0.936395	-1.08389	-0.84863	-0.961353
116	1.25904	1.03463	1.19403		-1.03427	-0.951052	-1.0145		-1.01053	-0.93855	-0.978452	-1.01675	-0.928396	-0.9805
117	0.471312	1.15192	0.393613		-0.91833	-1.1627	-0.812438		-0.8677	-1.17455	-0.781359	-0.891481	-1.13113	-0.787507
118	1.04602	1.29474	0.866955		-0.993795	-1.06881	-0.902421		-0.96602	-1.05769	-0.91639	-0.973628	-1.04779	-0.867709
119	1.05497	1.31615	0.402513		-1.06833	-1.11097	-0.597907		-1.08442	-1.0967	-0.541857	-1.03497	-1.09783	-0.595643
120	0.389541	0.447767	1.13288		-0.851172	-0.930374	-1.20112		-0.816519	-0.89661	-1.20942	-0.832051	-0.91853	-1.16308
121	0.417586	1.37217	0.474157		-0.826307	-1.1812	-0.893555		-0.78882	-1.20181	-0.851464	-0.813387	-1.14265	-0.879143
122	0.178733	0.284478	1.22315		-0.697014	-0.975539	-1.24168		-0.705028	-0.934045	-1.24503	-0.671495	-0.971699	-1.21585
123	0.306802	1.258	0.851287		-0.580175	-1.16413	-1.09498		-0.510092	-1.18099	-1.10388	-0.599194	-1.14367	-1.0566
124	1.09677	0.904328	0.243492		-1.11282	-1.08559	-0.473248		-1.10489	-1.09844	-0.401179	-1.08197	-1.06192	-0.455283
125	0.341756	0.399664	1.00854		-0.845413	-0.934464	-1.20164		-0.820489	-0.901861	-1.20614	-0.819373	-0.927828	-1.17092
126	1.43875	0.522039	0.386576		-1.17286	-0.931682	-0.755236		-1.1879	-0.907732	-0.719146	-1.14549	-0.924227	-0.753228
127	0.373895	0.968892	1.13673		-0.644476	-1.10847	-1.14348		-0.57605	-1.11959	-1.14519	-0.653845	-1.07993	-1.10584
128	1.00564	1.11308	1.24598		-0.957135	-1.00263	-1.04773		-0.928119	-0.970315	-1.02226	-0.940616	-0.972771	-1.01928
129	0.336043	0.411248	1.24326		-0.814572	-0.932634	-1.22009		-0.788193	-0.909716	-1.22784	-0.803928	-0.919083	-1.19312
130	0.257202	1.36806	0.43216		-0.683282	-1.20059	-0.977037		-0.660956	-1.20984	-0.943842	-0.657492	-1.16879	-0.971006
131	1.10712	0.552327	0.463804		-1.14263	-0.935912	-0.837127		-1.14561	-0.918129	-0.802182	-1.12133	-0.918763	-0.817789
132	0.745951	1.36548	0.652463		-0.93852	-1.12986	-0.863853		-0.89766	-1.14942	-0.856611	-0.922891	-1.09844	-0.851788
133	0.306479	1.25979	0.386912		-0.781422	-1.19374	-0.911249		-0.740035	-1.20915	-0.882941	-0.763348	-1.16381	-0.90405
134	0.991589	1.18297	0.164406		-1.09413	-1.10951	-0.324963		-1.09817	-1.11606	-0.2648	-1.06997	-1.09862	-0.357309
135	0.25901	0.166948	1.20899		-0.96741	-0.702881	-1.24499		-0.936615	-0.695848	-1.25022	-0.958663	-0.684207	-1.21903
136	0.513101	1.09512	1.18133		-0.733468	-1.09493	-1.11647		-0.663384	-1.10777	-1.13022	-0.738074	-1.06305	-1.08149
137	1.17352	0.786381	0.74714		-1.09364	-0.949949	-0.921961		-1.08331	-0.908057	-0.877856	-1.07141	-0.896502	-0.873645
138	1.19877	0.291578	0.326025		-1.19541	-0.812952	-0.87222		-1.20215	-0.76039	-0.826957	-1.16242	-0.801996	-0.850409
139	1.29751	0.535846	0.434053		-1.16237	-0.9249	-0.801957		-1.17717	-0.884972	-0.78106	-1.13856	-0.911665	-0.790469
140	1.22537	0.965802	0.486594		-1.10426	-1.04635	-0.705209		-1.09333	-1.02382	-0.657684	-1.07623	-1.01421	-0.658918
141	1.05666	0.864251	0.271281		-1.11233	-1.07961	-0.52711		-1.12011	-1.06043	-0.510453	-1.08962	-1.05423	-0.520757
142	0.317804	1.16985	0.29446		-0.865835	-1.19038	-0.814895		-0.846596	-1.2012	-0.801352	-0.855106	-1.16915	-0.78847
143	1.18759	0.301499	0.192606		-1.18825	-0.939715	-0.672564		-1.19502	-0.920781	-0.648267	-1.17243	-0.921936	-0.66623
144	0.331283	1.20698	0.197219		-0.955281	-1.18356	-0.650699		-0.918018	-1.18838	-0.657118	-0.937013	-1.16518	-0.618608
145	0.339499	0.269608	1.16518		-0.932069	-0.795571	-1.22996		-0.892132	-0.78565	-1.23542	-0.930633	-0.772731	-1.19333
146	0.517345	1.31793	0.394147		-0.932143	-1.1671	-0.773616		-0.904047	-1.18524	-0.745434	-0.92664	-1.13656	-0.752373
147	0.266203	0.375141	1.27323		-0.755444	-0.958419	-1.23071		-0.756005	-0.918435	-1.22858	-0.725817	-0.945727	-1.2039
148	1.09815	0.490429	0.330486		-1.15767	-0.963041	-0.739994		-1.15293	-0.93906	-0.734928	-1.12637	-0.95654	-0.693397
149	0.609868	0.544447	1.1974		-0.946106	-0.884982	-1.16694		-0.920416	-0.849617	-1.1645	-0.933311	-0.863636	-1.12909
150	1.02357	0.153656	0.289205		-1.20652	-0.634984	-0.993942		-1.20502	-0.617841	-0.965958	-1.18092	-0.636927	-0.969285
151	1.01811	1.14356	1.3199		-0.948688	-1.00159	-1.05794		-0.918527	-0.99075	-1.03908	-0.926207	-0.971759	-1.03187
152	0.357824	1.19335	0.392873		-0.83308	-1.18289	-0.881192		-0.802004	-1.18914	-0.839268	-0.821683	-1.16004	-0.867164
153	1.18156	0.235157	0.979272		-1.15952	-0.465863	-1.13233		-1.17773	-0.385482	-1.15306	-1.14007	-0.491748	-1.09871
154	1.14789	1.23624	0.852107		-1.02447	-1.04993	-0.88599		-1.0067	-1.01977	-0.885032	-0.987137	-1.03224	-0.859754
155	1.02083	0.415262	0.308661		-1.16453	-0.939341	-0.767777		-1.16955	-0.914343	-0.774671	-1.12777	-0.954831	-0.726565
156	0.171767	0.270349	1.20008		-0.699604	-0.972177	-1.243		-0.671425	-0.920645	-1.23835	-0.647999	-0.945151	-1.20799
157	1.17421	0.465197	0.547494		-1.15665	-0.84444	-0.92934		-1.17709	-0.805157	-0.895437	-1.12092	-0.834344	-0.919576
158	1.15075	1.05138	0.807299		-1.0502	-1.01866	-0.895538		-1.02366	-1.00533	-0.841173	-1.01613	-0.997569	-0.873377
159	1.03416	0.861109	1.36797		-0.998169	-0.909368	-1.0995		-0.961937	-0.898436	-1.08217	-0.977429	-0.89713	-1.07122
160	1.20102	1.14737	0.785129		-1.05159	-1.03655	-0.860733		-1.03363	-1.02181	-0.809995	-1.02375	-1.01406	-0.828888
161	0.824824	1.04888	1.29132		-0.900202	-1.01475	-1.0897		-0.884132	-0.99714	-1.0689	-0.875705	-0.991158	-1.06439
162	1.27224	0.277073	0.369383		-1.19875	-0.758809	-0.92099		-1.21659	-0.756692	-0.878985	-1.16782	-0.742494	-0.916048
163	0.787166	1.01971	1.25766		-0.893739	-1.01752	-1.09229		-0.86813	-1.00493	-1.07282	-0.877315	-0.992904	-1.06009
164	1.25133	1.36701	0.567968		-1.06786	-1.08884	-0.690564		-1.07567	-1.09039	-0.589128	-1.03515	-1.0632	-0.706595
165	0.474869	0.424538	1.22931		-0.922321	-0.858628	-1.20227		-0.874351	-0.847945	-1.20558	-0.902203	-0.851064	-1.16825
166	0.449711	0.700999	0.943506		-0.815791	-1.03845	-1.12945		-0.777057	-0.988371	-1.10262	-0.777638	-0.990042	-1.07465
167	0.567531	1.04364	0.731281		-0.86791	-1.10903	-0.993171		-0.820401	-1.10868	-0.957424	-0.854837	-1.07966	-0.967488
168	1.0504	0.364207	1.16031		-1.12054	-0.614037	-1.14103		-1.11321	-0.607463	-1.13416	-1.08327	-0.61557	-1.12542
169	0.990575	1.09692	0.715276		-1.02418	-1.05826	-0.870741		-1.00479	-1.04189	-0.842644	-1.00608	-1.02963	-0.833501
170	1.17374	0.574117	0.701979		-1.12861	-0.862813	-0.964531		-1.13873	-0.835162	-0.934034	-1.10007	-0.839734	-0.950891
171	0.308609	1.34041	0.265604		-0.873614	-1.19757	-0.777876		-0.8494	-1.21021	-0.768066	-0.864631	-1.1752	-0.766786
172	0.248337	1.19981	0.251404		-0.828812	-1.2029	-0.829444		-0.79985	-1.19528	-0.761781	-0.815963	-1.17112	-0.782634
173	1.05825	1.16741	0.727249		-1.03003	-1.06181	-0.852744		-0.996474	-1.05217	-0.843541	-1.01224	-1.02589	-0.828722
174	1.3054	0.318846	0.415275		-1.19297	-0.773594	-0.921047		-1.20443	-0.749015	-0.894099	-1.16345	-0.754947	-0.914445
175	0.299992	0.215649	1.19192		-0.948565	-0.750788	-1.23916		-0.924984	-0.725476	-1.23864	-0.929511	-0.726722	-1.21188
176	1.06721	1.31163	0.472839		-1.05951	-1.10514	-0.659379		-1.07353	-1.09976	-0.563135	-1.01774	-1.08254	-0.671559
177	0.507515	1.21152	0.445549		-0.910844	-1.15964	-0.83342		-0.886108	-1.16446	-0.804852	-0.905902	-1.11347	-0.796782
178	1.29359	0.456464	0.428322		-1.17327	-0.882263	-0.840491		-1.188	-0.844486	-0.790651	-1.14463	-0.871713	-0.832617
179	0.973551	1.19014	0.446034		-1.05744	-1.10328	-0.673674		-1.03071	-1.11305	-0.626908	-1.02416	-1.07477	-0.671243
180	1.15283	0.474583	1.33852		-1.1032	-0.671152	-1.13826		-1.08817	-0.635117	-1.15214	-1.07483	-0.6739	-1.10864
181	0.375006	1.29684	0.457632		-0.80424	-1.18337	-0.912876		-0.765544	-1.19065	-0.875968	-0.779476	-1.14961	-0.896239
182	0.670722	1.22933	0.827421		-0.876529	-1.11132	-0.980355		-0.863736	-1.09007	-0.975644	-0.846787	-1.09149	-0.9548
183	1.34494	0.510218	0.598502		-1.16129	-0.84035	-0.923931		-1.17432	-0.801891	-0.882722	-1.1302	-0.829869	-0.913038
184	1.36111	0.940303	0.35481		-1.12457	-1.05857	-0.570253		-1.13337	-1.05642	-0.501279	-1.10999	-1.03066	-0.580609
185	0.652448	0.764576	1.20922		-0.894618	-0.97583	-1.13389		-0.853214	-0.966326	-1.11045	-0.857236	-0.972611	-1.09338
186	0.93421	1.38308	0.523182		-1.02222	-1.11963	-0.722121		-1.0178	-1.12536	-0.655797	-0.997999	-1.0971	-0.731931
187	0.485501	1.06462	0.345132		-0.956018	-1.15535	-0.763094		-0.932813	-1.15044	-0.765045	-0.947819	-1.12563	-0.718822
188	1.08993	1.1857	1.01807		-0.996019	-1.02906	-0.964899		-0.974595	-1.00791	-0.94625	-0.970945	-0.995737	-0.939755
189	0.757103	0.608356	1.12415		-0.992866	-0.882239	-1.12743		-0.952443	-0.860651	-1.11567	-0.976059	-0.864228	-1.09077
190	1.24025	0.562954	0.740546		-1.1351	-0.837784	-0.978528		-1.1417	-0.800056	-0.943072	-1.11165	-0.825256	-0.956545
191	1.12096	1.24446	0.535123		-1.06277	-1.08846	-0.707759		-1.06712	-1.09319	-0.604634	-1.0301	-1.06221	-0.729362
192	0.557071	0.422601	1.3361		-0.964011	-0.80771	-1.20134		-0.904236	-0.772843	-1.20603	-0.939101	-0.773274	-1.15381
193	1.02835	0.223636	0.334308		-1.19643	-0.727223	-0.954007		-1.19153	-0.687706	-0.939272	-1.17654	-0.688859	-0.929325
194	1.03679	1.33652	0.875436		-0.986138	-1.07526	-0.902539		-0.957751	-1.06022	-0.85335	-0.954332	-1.04368	-0.893063
195	0.337765	1.14046	1.26563		-0.554197	-1.13067	-1.14825		-0.452362	-1.16249	-1.17116	-0.584195	-1.09916	-1.12254
196	0.433003	0.395114	1.41921		-0.900929	-0.847191	-1.22308		-0.866363	-0.818916	-1.2397	-0.898355	-0.838355	-1.18837
197	0.876078	1.25002	1.12874		-0.908495	-1.06042	-1.02506		-0.875507	-1.05426	-1.02289	-0.891161	-1.03233	-0.99041
198	1.13039	0.568238	0.505271		-1.13976	-0.926587	-0.859197		-1.14917	-0.894907	-0.851082	-1.11198	-0.918255	-0.837856
199	1.25486	0.394998	0.363413		-1.1817	-0.877555	-0.823476		-1.19634	-0.822029	-0.773269	-1.14039	-0.860884	-0.814529
200	0.747406	0.895456	1.24055		-0.904034	-0.993068	-1.10939		-0.880316	-0.949073	-1.08769	-0.878659	-0.976354	-1.06589
201	1.19106	0.950613	0.340164		-1.11265	-1.07166	-0.572438		-1.12576	-1.07082	-0.499028	-1.08577	-1.04621	-0.590912
202	1.12969	0.992923	0.738588		-1.06114	-1.01755	-0.877041		-1.04766	-0.992823	-0.856585	-1.03817	-0.994716	-0.836308
203	1.26238	0.420977	0.161414		-1.16255	-1.02089	-0.501037		-1.162	-1.00377	-0.489167	-1.14485	-1.00093	-0.47099
204	1.13833	1.28544	0.686216		-1.0409	-1.07647	-0.797674		-1.04567	-1.03473	-0.734342	-1.01583	-1.0339	-0.751442
205	0.70222	1.21726	0.726189		-0.916162	-1.11329	-0.930315		-0.891636	-1.11343	-0.889624	-0.898633	-1.08172	-0.904108
206	1.31728	0.763928	0.655562		-1.12259	-0.948416	-0.864885		-1.12357	-0.919677	-0.800549	-1.08974	-0.931408	-0.850206
207	0.496703	0.460081	1.01984		-0.93413	-0.892623	-1.17099		-0.89792	-0.859844	-1.16587	-0.907283	-0.861393	-1.14018
208	0.287869	1.25049	0.152854		-0.967661	-1.18505	-0.598212		-0.924454	-1.1866	-0.587271	-0.940115	-1.15389	-0.546647
209	0.298306	1.14841	0.35181		-0.804001	-1.19104	-0.894094		-0.780422	-1.19685	-0.853136	-0.801872	-1.1674	-0.878473
210	0.338017	1.13712	1.37165		-0.54201	-1.12631	-1.1567		-0.515831	-1.10787	-1.16644	-0.530387	-1.10722	-1.13606
211	1.37066	0.327332	0.872433		-1.16778	-0.586569	-1.08712		-1.17509	-0.519346	-1.09326	-1.14454	-0.58856	-1.04922
212	1.2316	0.462752	0.487922		-1.16549	-0.862821	-0.887386		-1.17409	-0.810146	-0.851382	-1.13665	-0.842617	-0.883412
213	0.894876	0.713232	1.2509		-1.00011	-0.887388	-1.11611		-0.969699	-0.863213	-1.09034	-0.974087	-0.855143	-1.08367
214	0.880555	0.493905	1.17114		-1.05858	-0.76763	-1.13835		-1.02541	-0.757265	-1.12408	-1.0316	-0.740852	-1.10943
215	0.74448	1.03926	1.27705		-0.868681	-1.02952	-1.09999		-0.824583	-1.01584	-1.08113	-0.860227	-0.998846	-1.068
216	0.296747	1.17013	0.255666		-0.878362	-1.1935	-0.784075		-0.835687	-1.20745	-0.777928	-0.873064	-1.16669	-0.765581
217	0.279284	0.324775	1.28514		-0.81474	-0.905491	-1.2372		-0.805657	-0.854421	-1.24743	-0.790384	-0.901368	-1.20507
218	1.25604	0.565671	0.653583		-1.14253	-0.863511	-0.937024		-1.14341	-0.828393	-0.883037	-1.11391	-0.850322	-0.918824
219	1.1266	1.30604	0.289575		-1.08955	-1.10987	-0.464125		-1.08735	-1.12428	-0.403333	-1.0701	-1.09527	-0.476349
220	0.571165	0.750631	1.16286		-0.857806	-0.998549	-1.14029		-0.819069	-0.980673	-1.10576	-0.80219	-0.99779	-1.08255
221	1.4423	0.614445	0.833379		-1.14187	-0.822724	-0.98084		-1.1493	-0.798311	-0.946389	-1.1155	-0.808244	-0.9651
222	0.300483	1.32699	0.256122		-0.875038	-1.19809	-0.773439		-0.846913	-1.2045	-0.726874	-0.861091	-1.16644	-0.764321
223	0.306525	1.40494	0.317498		-0.825786	-1.20082	-0.840087		-0.799029	-1.20944	-0.793635	-0.810398	-1.1737	-0.826764
224	0.396954	1.13041	0.503726		-0.813951	-1.16615	-0.941617		-0.798752	-1.15735	-0.927051	-0.78113	-1.14675	-0.913205
225	1.25666	1.11861	0.470482		-1.09615	-1.0705	-0.654829		-1.102	-1.07679	-0.580101	-1.07916	-1.0503	-0.666641
226	0.292491	0.246594	1.14396		-0.910922	-0.808658	-1.23689		-0.910711	-0.751933	-1.24362	-0.892713	-0.799535	-1.21057
227	0.432239	0.230429	1.17114		-1.02388	-0.665384	-1.21743		-0.989645	-0.656722	-1.22192	-0.997806	-0.650055	-1.18837
228	1.1544	0.302999	0.274384		-1.19216	-0.869039	-0.804256		-1.18895	-0.852794	-0.777479	-1.1696	-0.844198	-0.774172
229	0.471966	0.52947	1.20897		-0.869049	-0.933118	-1.1879		-0.839343	-0.893727	-1.18704	-0.840257	-0.906176	-1.15711
230	0.493035	1.18437	1.08254		-0.718947	-1.117	-1.09659		-0.69884	-1.1255	-1.07855	-0.715125	-1.08336	-1.07002
231	1.19499	0.543995	0.698061		-1.13601	-0.843307	-0.971332		-1.1439	-0.802929	-0.929824	-1.10987	-0.805254	-0.946787
232	1.14684	1.26763	0.538467		-1.0644	-1.08872	-0.701923		-1.06287	-1.09037	-0.625934	-1.03952	-1.05781	-0.712493
233	1.24824	1.26162	0.833106		-1.04314	-1.04661	-0.857831		-1.02132	-1.03048	-0.837337	-1.01165	-1.02692	-0.835052
234	0.702431	1.19804	0.807434		-0.899782	-1.10391	-0.967272		-0.859867	-1.10436	-0.950126	-0.867668	-1.08605	-0.933642
235	0.744446	1.03927	1.27706		-0.868664	-1.02953	-1.1		-0.824531	-1.01577	-1.08128	-0.860141	-0.998783	-1.06813
236	0.657573	0.494683	1.12327		-0.991992	-0.841518	-1.1577		-0.95249	-0.827511	-1.14538	-0.964495	-0.811025	-1.13389
237	0.279281	0.324785	1.28508		-0.81473	-0.905506	-1.23719		-0.80584	-0.854099	-1.24749	-0.790278	-0.901302	-1.205
238	1.25556	0.565714	0.653557		-1.14248	-0.86359	-0.937037		-1.1434	-0.828351	-0.883082	-1.11387	-0.850338	-0.918858
239	0.444615	0.987518	1.33282		-0.681276	-1.08479	-1.15443		-0.616684	-1.0769	-1.17425	-0.688751	-1.0428	-1.12871
240	1.07089	0.26229	1.27917		-1.1368	-0.475016	-1.15911		-1.14703	-0.405278	-1.1814	-1.11363	-0.511198	-1.13135
241	0.772609	1.19718	0.641785		-0.965855	-1.10843	-0.868139		-0.941033	-1.10002	-0.858771	-0.940193	-1.08609	-0.845289
242	1.09867	0.871733	1.32164		-1.01562	-0.90643	-1.08315		-0.991509	-0.883272	-1.05571	-0.996272	-0.880086	-1.04914
243	0.432045	1.42349	0.280898		-0.944666	-1.18149	-0.690988		-0.907935	-1.1915	-0.698101	-0.932494	-1.15824	-0.672945
244	0.364802	1.36143	0.46317		-0.787695	-1.18772	-0.919628		-0.768239	-1.20653	-0.8893	-0.775629	-1.16036	-0.919579
245	0.844651	0.787096	1.34121		-0.958793	-0.923054	-1.12625		-0.929175	-0.894175	-1.11373	-0.945524	-0.907017	-1.08973
246	0.361198	1.18038	1.11613		-0.595044	-1.13711	-1.12719		-0.523618	-1.14257	-1.14581	-0.60397	-1.11155	-1.0996
247	0.447977	0.402987	1.30841		-0.91206	-0.850815	-1.21388		-0.886317	-0.808551	-1.22804	-0.893153	-0.850633	-1.17223
248	0.284419	1.16104	0.330432		-0.803547	-1.19459	-0.885305		-0.768506	-1.1956	-0.846526	-0.780942	-1.17311	-0.865413
249	1.26358	0.456493	1.1067		-1.13078	-0.67325	-1.10249		-1.15027	-0.606411	-1.09124	-1.09944	-0.682928	-1.07312
250	0.37748	1.19495	0.260133		-0.936285	-1.18047	-0.71617		-0.902798	-1.18791	-0.707538	-0.919922	-1.15658	-0.694171
251	0.970767	1.0788	0.386627		-1.07473	-1.09697	-0.635168		-1.03251	-1.11046	-0.611308	-1.02843	-1.08512	-0.588402
252	0.506556	1.15726	0.442646		-0.915829	-1.15548	-0.836515		-0.879134	-1.16742	-0.798996	-0.898324	-1.12528	-0.820944
253	0.38241	1.15941	0.376398		-0.866193	-1.17771	-0.851503		-0.831844	-1.19833	-0.838337	-0.848584	-1.15039	-0.845334
254	1.26225	0.883762	1.19984		-1.05603	-0.900097	-1.03956		-1.04253	-0.868485	-1.01934	-1.03237	-0.874463	-1.02125
255	1.05204	1.18105	0.438545		-1.07115	-1.0964	-0.651398		-1.06179	-1.09164	-0.600472	-1.0464	-1.06316	-0.640711
256	0.85359	1.32298	0.970164		-0.915741	-1.0875	-0.976319		-0.883431	-1.08457	-0.977559	-0.889615	-1.06604	-0.951728
257	0.105438	0.235003	1.15738		-0.567399	-1.03407	-1.23615		-0.583904	-0.994603	-1.23414	-0.531361	-1.01056	-1.21794
258	0.509424	1.02571	0.52933		-0.89638	-1.13477	-0.912962		-0.876783	-1.10782	-0.876265	-0.866332	-1.1056	-0.904461
259	0.368507	1.42874	0.441545		-0.799456	-1.19121	-0.89868		-0.769974	-1.19781	-0.843204	-0.776665	-1.1613	-0.884312
260	0.307756	0.247708	1.15488		-0.924368	-0.79474	-1.23524		-0.883162	-0.795547	-1.24261	-0.916704	-0.781497	-1.2121
261	0.550943	1.56782	0.489584		-0.89339	-1.17423	-0.820446		-0.856223	-1.18988	-0.830265	-0.890079	-1.14927	-0.798504
262	1.3226	0.466026	1.02012		-1.13976	-0.69004	-1.08112		-1.16935	-0.65614	-1.05886	-1.12005	-0.68333	-1.06273
263	1.17602	0.296276	0.362274		-1.19231	-0.792474	-0.903494		-1.20522	-0.789847	-0.872593	-1.16957	-0.781552	-0.891395
264	1.12702	0.962925	0.286999		-1.10936	-1.08445	-0.515194		-1.09818	-1.08914	-0.483531	-1.09165	-1.06272	-0.495902
265	0.269666	0.334693	1.33411		-0.791459	-0.921426	-1.23856		-0.796996	-0.868713	-1.24628	-0.775705	-0.918713	-1.20871
266	1.19344	0.256532	0.326216		-1.20013	-0.770769	-0.905876		-1.19951	-0.741688	-0.877843	-1.17447	-0.745428	-0.872704
267	1.18834	0.555705	0.441569		-1.15109	-0.939319	-0.80857		-1.15648	-0.921085	-0.778337	-1.11173	-0.93675	-0.80169
268	0.409728	0.330073	1.29705		-0.933138	-0.806251	-1.22402		-0.892566	-0.788709	-1.21678	-0.908821	-0.765019	-1.19432
269	0.21256	0.202507	0.913344		-0.874401	-0.845368	-1.23966		-0.869489	-0.78286	-1.23488	-0.863871	-0.819008	-1.19113
270	0.306705	1.02842	1.1747		-0.551927	-1.12882	-1.1511		-0.49415	-1.13691	-1.15988	-0.561297	-1.10942	-1.12209
271	0.952284	1.07652	0.505662		-1.05249	-1.08507	-0.747047		-1.03238	-1.08328	-0.683904	-1.0152	-1.05692	-0.734341
272	0.455933	1.33723	0.404726		-0.891239	-1.17645	-0.817352		-0.847467	-1.19683	-0.822079	-0.879819	-1.14976	-0.803967
273	0.184102	1.31774	1.04161		-0.363078	-1.16479	-1.13708		-0.344952	-1.18207	-1.1169	-0.366972	-1.15193	-1.1269
274	0.458569	0.938934	1.18527		-0.72298	-1.07977	-1.13985		-0.697882	-1.06367	-1.13423	-0.711643	-1.06303	-1.11158
275	0.241892	0.292687	1.24517		-0.796902	-0.912237	-1.24161		-0.786184	-0.891147	-1.24333	-0.782634	-0.899252	-1.22257
276	1.18345	1.03691	0.245064		-1.10919	-1.09227	-0.43803		-1.12144	-1.08151	-0.404111	-1.0987	-1.05937	-0.460256
277	0.426576	1.17789	0.39535		-0.887036	-1.17136	-0.838501		-0.853907	-1.17219	-0.809596	-0.863449	-1.1456	-0.811749
278	1.15006	0.275878	0.150078		-1.18492	-0.965142	-0.609124		-1.18973	-0.944213	-0.600183	-1.16083	-0.967831	-0.560261
279	0.41094	1.26502	0.324859		-0.911615	-1.17999	-0.770323		-0.880806	-1.19728	-0.755533	-0.907596	-1.15513	-0.754696
280	1.14826	1.3035	0.2271		-1.09515	-1.1087	-0.382029		-1.09675	-1.11675	-0.32388	-1.08053	-1.09564	-0.4134
281	0.415018	1.12382	0.924693		-0.694266	-1.13282	-1.08869		-0.629952	-1.14516	-1.07423	-0.69074	-1.0987	-1.05262
282	0.38898	0.274611	1.34655		-0.95854	-0.752437	-1.23192		-0.939988	-0.711188	-1.23722	-0.952143	-0.724541	-1.19878
283	1.10791	0.808128	0.692508		-1.08572	-0.976257	-0.898118		-1.07228	-0.962063	-0.870713	-1.05299	-0.953945	-0.881508
284	0.343923	0.298544	1.3158		-0.904669	-0.820105	-1.23505		-0.88215	-0.786161	-1.24439	-0.896055	-0.810316	-1.19876
285	0.978606	1.23485	0.350184		-1.07119	-1.11326	-0.571294		-1.062	-1.12701	-0.503032	-1.04155	-1.09463	-0.563385
286	1.21877	1.29982	0.777312		-1.04154	-1.06156	-0.830321		-1.03926	-1.04303	-0.75539	-1.01008	-1.03712	-0.823147
287	0.37136	1.15662	0.551468		-0.766441	-1.16876	-0.980193		-0.758943	-1.17448	-0.947363	-0.74499	-1.14044	-0.970282
288	1.27416	0.970495	0.805528		-1.0801	-0.98613	-0.893389		-1.06521	-0.971257	-0.874477	-1.05663	-0.968515	-0.86753
289	0.225917	1.04067	0.165629		-0.906405	-1.19682	-0.715805		-0.897792	-1.18659	-0.667477	-0.899203	-1.16876	-0.675784
290	1.05536	0.494105	0.36061		-1.15261	-0.953892	-0.776241		-1.15146	-0.910912	-0.736814	-1.12513	-0.911855	-0.749569
291	1.00846	0.815997	1.29636		-1.00584	-0.903751	-1.0963		-0.99673	-0.868752	-1.06946	-0.989926	-0.858253	-1.07126
292	0.334238	0.387623	1.27881		-0.827132	-0.91459	-1.22531		-0.827871	-0.874871	-1.22768	-0.814053	-0.902263	-1.20203
293	0.665455	1.24586	0.567632		-0.940318	-1.13381	-0.851656		-0.904435	-1.14457	-0.83524	-0.920112	-1.10737	-0.831824
294	1.16227	0.286282	0.197789		-1.19126	-0.923635	-0.700319		-1.18594	-0.883625	-0.647064	-1.16354	-0.875264	-0.650928
295	1.16954	0.921869	0.134648		-1.10988	-1.09216	-0.285609		-1.11579	-1.09455	-0.235104	-1.10063	-1.08624	-0.313707
296	1.09686	0.295438	0.354908		-1.18853	-0.802237	-0.902519		-1.19978	-0.756577	-0.882733	-1.15948	-0.791447	-0.881559
297	0.115206	1.28844	1.03108		-0.248776	-1.16207	-1.13904		-0.178222	-1.16558	-1.14339	-0.275893	-1.15494	-1.12938
298	1.26407	1.14928	0.542855		-1.08771	-1.06438	-0.705263		-1.09212	-1.04481	-0.66842	-1.05387	-1.04652	-0.704286
299	0.386569	0.903796	0.520139		-0.824868	-1.14175	-0.978938		-0.822764	-1.12326	-0.945092	-0.800306	-1.11272	-0.960345
300	0.588965	1.17679	0.915107		-0.819117	-1.11038	-1.03617		-0.757996	-1.08029	-1.00553	-0.762397	-1.06284	-1.00508
301	1.34902	0.993951	0.859932		-1.08316	-0.976188	-0.903133		-1.06375	-0.947218	-0.847626	-1.04632	-0.946493	-0.864609
302	1.45286	1.16625	0.356177		-1.11408	-1.07953	-0.514125		-1.13203	-1.07956	-0.438925	-1.09494	-1.05579	-0.545278
303	0.942061	1.23329	0.244848		-1.08235	-1.11766	-0.449994		-1.06777	-1.12988	-0.425002	-1.06585	-1.10228	-0.431862
304	1.26963	1.22728	0.771359		-1.0569	-1.04631	-0.830403		-1.04336	-1.03902	-0.780029	-1.03618	-1.02323	-0.825697
305	0.459775	0.342662	1.1812		-0.963144	-0.794996	-1.20873		-0.927488	-0.765088	-1.21782	-0.947352	-0.781644	-1.17056
306	1.18685	0.347594	0.385041		-1.1844	-0.829072	-0.882258		-1.19228	-0.795164	-0.833733	-1.15811	-0.823384	-0.86567
307	1.52352	0.475032	0.522773		-1.18006	-0.8359	-0.885082		-1.20112	-0.79214	-0.850229	-1.14188	-0.821975	-0.876433
308	1.23275	0.310047	0.501891		-1.18525	-0.71853	-0.984844		-1.1928	-0.671037	-0.960513	-1.15974	-0.707292	-0.962213
309	0.577403	1.14479	1.29395		-0.753489	-1.08358	-1.11845		-0.691441	-1.09441	-1.1211	-0.76209	-1.05432	-1.08908
310	1.37111	0.41675	1.00315		-1.15123	-0.645351	-1.08704		-1.17288	-0.558582	-1.09784	-1.12093	-0.668766	-1.04972
311	0.681012	1.35887	0.530096		-0.949309	-1.14431	-0.809165		-0.913146	-1.15268	-0.755439	-0.925264	-1.10572	-0.801089
312	1.28391	0.806278	0.414078		-1.12971	-1.0254	-0.676665		-1.14392	-0.977743	-0.687684	-1.10096	-1.01507	-0.655455
313	1.17092	0.44438	1.38058		-1.10964	-0.637378	-1.14501		-1.10245	-0.606586	-1.15686	-1.07491	-0.644914	-1.126
314	0.269952	1.33048	0.258044		-0.842358	-1.2033	-0.808536		-0.825392	-1.21216	-0.779814	-0.840737	-1.1751	-0.801241
315	1.08331	0.241506	1.25053		-1.1419	-0.448353	-1.15737		-1.16385	-0.371338	-1.16793	-1.12253	-0.483169	-1.13683
316	0.271123	0.203705	1.09589		-0.937561	-0.765857	-1.23986		-0.901717	-0.770812	-1.23937	-0.936742	-0.728605	-1.21802
317	0.403111	1.37309	0.135509		-1.02921	-1.16043	-0.448733		-1.02854	-1.15997	-0.401503	-1.00501	-1.14357	-0.450655
318	1.25662	0.719941	0.654287		-1.1215	-0.937509	-0.884123		-1.12812	-0.900574	-0.842578	-1.08315	-0.924232	-0.866124
319	0.67911	0.500653	1.44024		-0.978599	-0.809603	-1.18884		-0.951667	-0.774199	-1.19493	-0.960313	-0.80077	-1.15266
320	0.341872	1.10962	0.373798		-0.836331	-1.18103	-0.881983		-0.815872	-1.19254	-0.855501	-0.812542	-1.15793	-0.861881
321	0.868952	1.32126	0.383202		-1.04338	-1.12744	-0.623314		-1.00647	-1.14706	-0.590869	-1.0077	-1.10638	-0.619687
322	1.31657	0.438213	0.404546		-1.17784	-0.881044	-0.829408		-1.18692	-0.833522	-0.813564	-1.14569	-0.867927	-0.801398
323	1.34646	0.20935	1.02537		-1.16609	-0.401644	-1.1325		-1.18756	-0.357186	-1.11916	-1.15081	-0.423422	-1.10823
324	0.430312	1.3827	1.26893		-0.60719	-1.13774	-1.12191		-0.526927	-1.16645	-1.13908	-0.634867	-1.11089	-1.09175
325	0.225856	0.246822	1.2957		-0.82234	-0.876928	-1.24965		-0.787243	-0.873874	-1.25407	-0.81703	-0.86606	-1.22932
326	1.33208	0.747249	0.921184		-1.10676	-0.880775	-0.98355		-1.10487	-0.846233	-0.958725	-1.07985	-0.859205	-0.952501
327	0.29986	1.18231	0.315743		-0.830782	-1.19363	-0.854864		-0.784814	-1.19433	-0.82887	-0.797012	-1.16944	-0.832517
328	0.840238	0.224702	1.05804		-1.13031	-0.497656	-1.16236		-1.10347	-0.462947	-1.17986	-1.10417	-0.465281	-1.13387
329	0.583053	1.21376	0.658227		-0.87619	-1.13524	-0.936829		-0.82367	-1.13013	-0.928162	-0.841696	-1.1141	-0.895907
330	1.20698	0.205841	0.288305		-1.2084	-0.729601	-0.922978		-1.21592	-0.716286	-0.890821	-1.19398	-0.704949	-0.912772
331	0.725426	1.11953	0.61332		-0.963663	-1.10678	-0.875243		-0.931559	-1.11406	-0.850066	-0.9489	-1.07225	-0.858166
332	0.286245	0.323366	1.13081		-0.832284	-0.904724	-1.22878		-0.78936	-0.882724	-1.23848	-0.813424	-0.885395	-1.20204
333	1.10138	0.248483	0.38942		-1.19313	-0.717265	-0.969143		-1.19304	-0.69154	-0.943765	-1.16224	-0.673726	-0.960103
334	0.474756	1.06939	0.619552		-0.836375	-1.13846	-0.973731		-0.813526	-1.13051	-0.948082	-0.80919	-1.10858	-0.950614
335	0.81494	0.194355	0.949146		-1.13901	-0.469613	-1.15744		-1.15579	-0.398574	-1.16731	-1.11586	-0.478472	-1.14037
336	1.19623	0.254684	0.21441		-1.20018	-0.875146	-0.76557		-1.20368	-0.84622	-0.757817	-1.17929	-0.849884	-0.74263
337	0.327176	0.400156	1.23653		-0.813145	-0.931175	-1.2218		-0.791002	-0.906108	-1.22016	-0.787191	-0.915685	-1.19337
338	1.23767	0.512877	0.794112		-1.13849	-0.790363	-1.01537		-1.11788	-0.771339	-0.962926	-1.11903	-0.728225	-0.967937
339	0.648969	0.502707	1.07966		-0.98894	-0.855133	-1.15119		-0.964262	-0.822467	-1.14093	-0.972082	-0.826403	-1.11742
340	0.169932	1.10791	0.966282		-0.374211	-1.16055	-1.14199		-0.388132	-1.18763	-1.09428	-0.378173	-1.1402	-1.13508
341	0.341945	1.17118	1.31866		-0.546556	-1.13077	-1.15025		-0.493383	-1.14733	-1.15916	-0.561457	-1.10978	-1.13709
342	0.347022	0.977505	1.19162		-0.606375	-1.11331	-1.15222		-0.543315	-1.11767	-1.16198	-0.611886	-1.08747	-1.12321
343	0.153327	0.972743	0.265379		-0.662628	-1.20701	-0.976228		-0.650323	-1.21098	-0.957866	-0.640982	-1.18813	-0.950625
344	1.30196	0.366802	0.40441		-1.18703	-0.827133	-0.877726		-1.20002	-0.808216	-0.853791	-1.15836	-0.811383	-0.877327
345	1.2229	0.337507	0.290505		-1.18943	-0.88348	-0.78931		-1.183	-0.865273	-0.721778	-1.16845	-0.833301	-0.761103
346	0.298358	0.335449	1.19432		-0.832773	-0.902504	-1.22988		-0.811362	-0.86922	-1.23225	-0.819953	-0.881478	-1.19419
347	0.353846	1.27513	0.387047		-0.827846	-1.18806	-0.874005		-0.799556	-1.20113	-0.863831	-0.804938	-1.16774	-0.867852
348	1.12381	1.15705	0.92318		-1.0188	-1.0296	-0.930348		-1.00507	-1.00005	-0.917923	-1.00401	-0.997445	-0.893329
349	1.33856	1.31883	1.07697		-1.02686	-1.02134	-0.930746		-0.998907	-1.00771	-0.874166	-0.996407	-0.999196	-0.893989
350	0.977718	1.16022	1.28597		-0.937137	-1.01455	-1.05468		-0.977884	-0.990754	-0.979077	-0.963746	-0.975209	-0.98646
351	1.09835	0.514149	0.636763		-1.13408	-0.85431	-0.963502		-1.12594	-0.841262	-0.924974	-1.10621	-0.814047	-0.943142
352	1.04339	0.447936	1.28857		-1.09532	-0.677035	-1.14469		-1.08256	-0.627169	-1.16009	-1.06034	-0.669066	-1.12423
353	1.03202	0.297351	1.29825		-1.12621	-0.524346	-1.16125		-1.12457	-0.483377	-1.17093	-1.10165	-0.535453	-1.13926
354	1.26022	0.51854	0.560246		-1.15568	-0.867005	-0.904926		-1.18023	-0.841502	-0.874574	-1.12016	-0.861937	-0.890999
355	1.1834	0.996282	1.13379		-1.02982	-0.956874	-1.01375		-1.01525	-0.930837	-0.981992	-1.01059	-0.939672	-0.987525
356	0.238951	1.11719	0.227581		-0.845771	-1.20134	-0.809997		-0.836058	-1.20853	-0.776336	-0.840103	-1.18228	-0.791242
357	0.263445	0.231744	1.29502		-0.889955	-0.811868	-1.24748		-0.866201	-0.779068	-1.25458	-0.880382	-0.799249	-1.2207
358	1.03755	1.02466	0.137437		-1.10175	-1.10075	-0.289934		-1.09534	-1.10735	-0.293587	-1.09738	-1.07814	-0.276029
359	0.296341	0.409644	1.25249		-0.769836	-0.959411	-1.22364		-0.759977	-0.924122	-1.22626	-0.745611	-0.953327	-1.18529
360	0.246522	1.03652	1.38928		-0.448884	-1.13322	-1.16725		-0.399959	-1.12861	-1.18886	-0.470286	-1.11258	-1.1474
361	0.922355	0.26053	1.24694		-1.12409	-0.506829	-1.1675		-1.10581	-0.456294	-1.18931	-1.09182	-0.490087	-1.13597
362	0.439822	0.320362	1.20784		-0.963885	-0.780923	-1.21524		-0.934462	-0.779414	-1.21267	-0.958032	-0.761368	-1.18363
363	1.27691	0.727752	1.22474		-1.08131	-0.827315	-1.07047		-1.08812	-0.773434	-1.0731	-1.05676	-0.82846	-1.04385
364	0.389002	0.506803	1.25406		-0.808942	-0.959458	-1.20408		-0.779314	-0.952005	-1.1865	-0.76396	-0.950914	-1.16994
365	0.426823	1.10183	0.464305		-0.859085	-1.16164	-0.901064		-0.818661	-1.16065	-0.874038	-0.840591	-1.13708	-0.875227
366	1.04612	1.23617	0.296237		-1.08562	-1.11061	-0.495154		-1.07876	-1.12932	-0.429582	-1.07014	-1.09321	-0.507641
367	1.20501	0.404176	0.3003		-1.17786	-0.925827	-0.749573		-1.19414	-0.891023	-0.735513	-1.14998	-0.90759	-0.734683
368	0.954344	0.657731	1.3469		-1.02335	-0.835141	-1.13189		-1.0076	-0.80901	-1.09566	-1.01133	-0.787544	-1.08233
369	1.18554	0.485777	1.03903		-1.12098	-0.72121	-1.08996		-1.14539	-0.665259	-1.06806	-1.09196	-0.697793	-1.05344
370	1.21261	0.367195	0.560672		-1.17296	-0.753016	-0.983027		-1.17322	-0.729263	-0.951229	-1.15592	-0.727978	-0.962305
371	0.531454	1.48741	0.47775		-0.892319	-1.17284	-0.826185		-0.854045	-1.19286	-0.789482	-0.883438	-1.13786	-0.821496
372	0.234187	0.276624	1.33063		-0.799383	-0.901072	-1.24695		-0.78925	-0.874833	-1.25419	-0.792025	-0.895683	-1.22458
373	1.30494	0.840142	0.937027		-1.08934	-0.918564	-0.970005		-1.09353	-0.896003	-0.923246	-1.0587	-0.897122	-0.942757
374	0.26814	1.23787	0.255497		-0.846309	-1.20085	-0.810826		-0.814207	-1.20402	-0.760465	-0.824212	-1.17645	-0.802499
375	0.251837	1.37311	0.317862		-0.7632	-1.20688	-0.895367		-0.74308	-1.22072	-0.86572	-0.756809	-1.17489	-0.892219
376	0.358771	0.304652	1.03141		-0.926782	-0.832108	-1.21463		-0.911828	-0.808814	-1.20538	-0.890388	-0.825084	-1.17831
377	0.261253	0.310687	1.02925		-0.818029	-0.920458	-1.22629		-0.786953	-0.893153	-1.23206	-0.795543	-0.917189	-1.18397
378	0.475902	1.25992	0.376211		-0.922313	-1.16979	-0.78381		-0.884374	-1.18485	-0.747592	-0.908564	-1.13278	-0.763178
379	1.01739	0.216412	0.337451		-1.19654	-0.713803	-0.964258		-1.20183	-0.685213	-0.933064	-1.16995	-0.691667	-0.931854
380	0.402954	0.559428	1.41931		-0.783586	-0.971103	-1.20858		-0.753366	-0.951114	-1.21825	-0.765708	-0.971906	-1.17565
381	0.556741	0.423159	1.20826		-0.970804	-0.818243	-1.19014		-0.945839	-0.770963	-1.19836	-0.959229	-0.800429	-1.15029
382	0.949613	0.219978	0.421985		-1.18463	-0.665169	-1.02103		-1.18431	-0.678988	-0.98425	-1.16128	-0.660152	-1.00302
383	0.761936	0.712456	1.1824		-0.960605	-0.926864	-1.12129		-0.926919	-0.901937	-1.10219	-0.939405	-0.910976	-1.08101
384	1.34556	0.258763	0.285134		-1.2058	-0.803021	-0.854202		-1.20887	-0.767315	-0.813504	-1.18237	-0.792868	-0.840735
385	1.3246	0.238082	0.981331		-1.16616	-0.453326	-1.12547		-1.19287	-0.450307	-1.08795	-1.14512	-0.477104	-1.10276
386	0.899491	1.52285	1.12601		-0.885802	-1.09668	-0.994669		-0.834283	-1.09925	-0.943349	-0.866764	-1.06156	-0.959336
387	0.981152	1.48865	0.701337		-0.989781	-1.11315	-0.814435		-0.957836	-1.10177	-0.772033	-0.960852	-1.08518	-0.785169
388	1.39442	0.598809	1.14873		-1.12084	-0.751344	-1.07142		-1.13468	-0.702004	-1.05325	-1.08678	-0.761615	-1.04251
389	1.20735	1.2771	0.673996		-1.05476	-1.07066	-0.779618		-1.04812	-1.05662	-0.716626	-1.01716	-1.05152	-0.771115
390	1.26162	1.11993	1.3621		-1.00935	-0.9566	-1.04025		-0.997283	-0.931257	-1.01464	-0.991359	-0.945063	-1.01309
391	0.376844	1.03226	0.693478		-0.733449	-1.14504	-1.04674		-0.733896	-1.1453	-0.986015	-0.694737	-1.11643	-1.0223
392	0.370778	0.462346	1.14885		-0.824241	-0.949767	-1.2028		-0.818754	-0.912433	-1.20673	-0.8183	-0.937415	-1.17121
393	1.41764	0.609161	0.498414		-1.15866	-0.926462	-0.809989		-1.17114	-0.905086	-0.758903	-1.12768	-0.911179	-0.810088
394	1.32868	0.355898	0.968415		-1.15714	-0.598594	-1.09844		-1.17912	-0.534269	-1.10567	-1.12895	-0.622298	-1.07214
395	1.31301	0.993308	0.72802		-1.09019	-1.00165	-0.845932		-1.10181	-0.961824	-0.84293	-1.0603	-0.993505	-0.821602
396	0.372256	1.01243	0.304791		-0.913451	-1.17158	-0.794411		-0.878769	-1.17639	-0.774337	-0.901567	-1.1433	-0.768168
397	0.540635	1.10717	1.24266		-0.742363	-1.08775	-1.12002		-0.68162	-1.09383	-1.11306	-0.766593	-1.0436	-1.07806
398	0.370018	0.318352	0.952995		-0.931469	-0.845851	-1.20352		-0.881879	-0.833051	-1.18776	-0.896761	-0.797684	-1.17536
399	0.245467	0.265404	1.01698		-0.841564	-0.888421	-1.23367		-0.813047	-0.855762	-1.22112	-0.789219	-0.856488	-1.20598
400	0.841991	1.11702	1.32626		-0.891149	-1.02489	-1.08628		-0.872241	-1.01781	-1.06964	-0.86232	-1.00018	-1.0656
401	0.500305	0.391841	1.15637		-0.959972	-0.822716	-1.19602		-0.903946	-0.822043	-1.19166	-0.949203	-0.786964	-1.15926
402	1.26169	0.948612	0.747494		-1.08629	-0.991509	-0.872181		-1.07561	-0.949641	-0.856144	-1.06265	-0.953555	-0.83662
403	1.07938	0.800722	1.43613		-1.01673	-0.869475	-1.11325		-0.993086	-0.841646	-1.0899	-1.00975	-0.84345	-1.07034
404	0.509075	1.15454	0.395459		-0.938059	-1.15714	-0.79328		-0.909629	-1.15812	-0.763867	-0.919646	-1.13041	-0.77669
405	1.39535	0.440436	0.524432		-1.17739	-0.818251	-0.912026		-1.19202	-0.765982	-0.885163	-1.14894	-0.799088	-0.891141
406	0.987473	0.250027	1.09081		-1.13888	-0.498614	-1.1521		-1.13636	-0.445267	-1.17069	-1.11881	-0.492085	-1.12224
407	1.11289	0.513937	0.727537		-1.12861	-0.825126	-1.00189		-1.11223	-0.830867	-0.969307	-1.0912	-0.786178	-1.00463
408	0.204103	1.2142	1.37256		-0.363381	-1.14969	-1.15609		-0.313974	-1.15123	-1.16916	-0.403618	-1.12893	-1.13037
409	1.08675	0.60734	0.55927		-1.12439	-0.932342	-0.885524		-1.13545	-0.913624	-0.856501	-1.08907	-0.931117	-0.855921
410	1.34111	0.354611	0.803022		-1.1674	-0.638991	-1.06506		-1.17673	-0.612328	-1.05087	-1.14143	-0.632908	-1.03133
411	0.314202	0.385531	1.11008		-0.817399	-0.936273	-1.21613		-0.781661	-0.919551	-1.21063	-0.780695	-0.921415	-1.18616
412	0.627728	0.773232	1.33143		-0.867304	-0.977124	-1.15324		-0.831919	-0.939483	-1.14973	-0.850047	-0.952165	-1.11489
413	1.22653	0.825176	0.653272		-1.10468	-0.97776	-0.856458		-1.10364	-0.941456	-0.800021	-1.07276	-0.94546	-0.824648
414	1.14101	1.21415	0.607218		-1.05821	-1.07514	-0.759423		-1.05143	-1.06061	-0.725888	-1.04342	-1.04905	-0.74467
415	1.34304	0.406383	0.459796		-1.18173	-0.826711	-0.891873		-1.20056	-0.794448	-0.881755	-1.15916	-0.818259	-0.871579
416	0.295306	0.335445	1.26999		-0.825442	-0.901759	-1.23411		-0.80375	-0.876879	-1.24403	-0.820725	-0.885089	-1.20866
417	1.1433	0.506014	0.43496		-1.1548	-0.91999	-0.83165		-1.14304	-0.901509	-0.769898	-1.12391	-0.906402	-0.789722
418	1.05677	1.22703	1.24663		-0.955657	-1.02041	-1.02746		-0.93924	-0.987497	-0.998434	-0.938262	-1.00037	-0.999211
419	0.57067	0.412381	1.25324		-0.980017	-0.798696	-1.19378		-0.938313	-0.796811	-1.192	-0.970356	-0.777535	-1.16263
420	1.28547	1.15137	0.987905		-1.04382	-1.00292	-0.931792		-1.02155	-0.984904	-0.948241	-1.02492	-0.984834	-0.891967
421	0.655793	1.05889	1.00814		-0.858067	-1.07175	-1.05755		-0.805401	-1.08864	-1.02166	-0.815695	-1.05065	-1.01522
422	1.06426	0.217115	1.26765		-1.14345	-0.415126	-1.15968		-1.16798	-0.320604	-1.17364	-1.12171	-0.456687	-1.13776
423	0.574555	1.13228	1.29408		-0.75391	-1.0821	-1.11995		-0.708324	-1.08139	-1.12964	-0.758432	-1.05246	-1.09128
424	1.26579	0.509385	0.39951		-1.16494	-0.928762	-0.787093		-1.17918	-0.898115	-0.765278	-1.13741	-0.912965	-0.772338
425	0.558971	0.41163	1.04564		-0.988436	-0.823035	-1.17267		-0.955483	-0.792918	-1.17395	-0.975374	-0.800454	-1.14007
426	0.835705	1.30835	0.652712		-0.973847	-1.11331	-0.843573		-0.932635	-1.1252	-0.835645	-0.956819	-1.08692	-0.820906
427	0.354081	0.220835	0.968089		-0.995417	-0.723733	-1.21754		-0.997491	-0.678037	-1.20935	-0.983008	-0.698668	-1.17831
428	1.2912	0.499779	0.428312		-1.16708	-0.908636	-0.816317		-1.18551	-0.872323	-0.777252	-1.12809	-0.898998	-0.806398
429	0.997924	0.361948	0.274391		-1.17289	-0.927277	-0.764092		-1.16122	-0.91844	-0.71295	-1.13399	-0.92953	-0.70264
430	0.216224	1.17438	0.908411		-0.452762	-1.16387	-1.12864		-0.462764	-1.15404	-1.11726	-0.439101	-1.15003	-1.10074
431	1.2744	1.20956	1.46068		-0.992129	-0.968718	-1.04734		-0.970345	-0.940745	-1.00616	-0.971347	-0.938682	-1.00884
432	0.713938	1.39003	0.923642		-0.858673	-1.11798	-0.987568		-0.833835	-1.11845	-0.963442	-0.833715	-1.08881	-0.970024
433	0.164879	1.03831	0.826647		-0.399959	-1.16405	-1.13531		-0.386063	-1.16828	-1.12483	-0.386431	-1.14973	-1.11455
434	0.237254	1.27719	0.311922		-0.752423	-1.20597	-0.908398		-0.726675	-1.20809	-0.880306	-0.728708	-1.18274	-0.881331
435	1.09361	0.358249	0.626022		-1.15975	-0.729903	-1.02476		-1.17265	-0.686391	-0.982128	-1.12458	-0.717157	-0.981639
436	0.49122	1.26042	0.533884		-0.859925	-1.16106	-0.901367		-0.825835	-1.15927	-0.86129	-0.84003	-1.13657	-0.877702
437	0.827076	1.19874	0.602826		-0.992062	-1.10539	-0.829008		-0.958307	-1.10508	-0.797285	-0.960918	-1.07959	-0.809655
438	0.844551	0.688886	1.26183		-0.989606	-0.886552	-1.1272		-0.966007	-0.856362	-1.11282	-0.968356	-0.868165	-1.09195
439	0.325319	1.18456	1.30288		-0.528198	-1.13521	-1.14968		-0.460077	-1.14895	-1.16577	-0.556155	-1.11541	-1.12081
440	0.253709	1.36985	1.24228		-0.42603	-1.15679	-1.14193		-0.364735	-1.17622	-1.14482	-0.455983	-1.13771	-1.12168
441	1.16519	0.274903	0.466769		-1.18789	-0.699605	-0.992879		-1.19067	-0.687058	-0.954315	-1.1668	-0.671165	-0.969581
442	1.11992	0.317672	0.401415		-1.18398	-0.793877	-0.922325		-1.19496	-0.766781	-0.874311	-1.1551	-0.768799	-0.899384
443	0.456187	1.14803	1.06093		-0.699028	-1.12026	-1.10328		-0.628418	-1.14378	-1.11566	-0.713434	-1.09201	-1.07253
444	1.25329	1.0332	1.05502		-1.0456	-0.968554	-0.977059		-1.0198	-0.949849	-0.947889	-1.02688	-0.943182	-0.952281
445	1.26384	0.295167	1.50325		-1.13893	-0.459531	-1.15919		-1.16435	-0.367435	-1.1751	-1.11539	-0.489811	-1.13668
446	0.949332	0.531424	1.20387		-1.06236	-0.774219	-1.13029		-1.05092	-0.706272	-1.12569	-1.01345	-0.734597	-1.08883
447	1.16022	0.353471	0.416218		-1.18039	-0.817671	-0.905504		-1.19049	-0.764432	-0.889022	-1.155	-0.787603	-0.8768
448	1.48996	0.539728	0.469643		-1.17218	-0.900157	-0.81552		-1.18108	-0.867026	-0.797334	-1.13078	-0.896764	-0.782866
449	0.427959	1.51993	1.04817		-0.629607	-1.15786	-1.08431		-0.567237	-1.18161	-1.08697	-0.654105	-1.13005	-1.05576
450	1.42559	1.17124	0.556946		-1.10127	-1.05487	-0.689337		-1.10493	-1.04449	-0.634257	-1.07182	-1.03534	-0.68377
451	1.01268	0.209115	0.458099		-1.18652	-0.618089	-1.04235		-1.17583	-0.590702	-1.01052	-1.16697	-0.548305	-1.00734
452	1.09934	0.220457	0.262711		-1.20388	-0.784126	-0.881735		-1.21339	-0.797515	-0.844017	-1.18794	-0.766416	-0.874427
453	1.39002	0.375433	0.512784		-1.18546	-0.769692	-0.942328		-1.18315	-0.740939	-0.908633	-1.15885	-0.758831	-0.916142
454	1.10009	0.517726	0.41598		-1.15018	-0.937967	-0.813509		-1.15374	-0.916542	-0.786788	-1.11048	-0.934459	-0.77749
455	1.13794	1.00932	1.28121		-1.0049	-0.950818	-1.05184		-0.994679	-0.926107	-1.04242	-0.980702	-0.925597	-1.03411
456	0.752871	0.61068	1.5614		-0.961139	-0.846138	-1.18098		-0.937331	-0.788715	-1.19189	-0.939157	-0.837637	-1.13881
457	0.334132	0.352705	1.19274		-0.857595	-0.889582	-1.22422		-0.835186	-0.869367	-1.22949	-0.836214	-0.886012	-1.19574
458	1.25912	0.853951	1.0799		-1.06904	-0.906052	-1.01541		-1.03726	-0.883514	-1.00483	-1.03757	-0.870003	-0.998548
459	0.641499	1.29604	0.834032		-0.852326	-1.12335	-0.984752		-0.834977	-1.11717	-0.945156	-0.831943	-1.09942	-0.967041
460	0.247383	0.226006	1.19303		-0.880534	-0.825638	-1.24615		-0.870159	-0.781784	-1.24256	-0.855089	-0.798552	-1.21156
461	1.40522	0.843691	0.61926		-1.12474	-0.976352	-0.810838		-1.1212	-0.948765	-0.750869	-1.09216	-0.938659	-0.778347
462	0.596474	1.12777	0.766714		-0.864214	-1.11374	-0.989108		-0.827109	-1.09171	-1.00052	-0.823719	-1.08832	-0.983809
463	0.37235	1.19728	1.02953		-0.619796	-1.14131	-1.1122		-0.53973	-1.15921	-1.12631	-0.646701	-1.10602	-1.09048
464	1.17181	1.04583	0.221601		-1.1082	-1.095	-0.405276		-1.11531	-1.09662	-0.356777	-1.09573	-1.07642	-0.424218
465	0.419672	1.28014	1.12818		-0.634878	-1.13685	-1.11193		-0.609961	-1.15541	-1.09112	-0.635821	-1.11862	-1.09511
466	1.05237	0.512977	0.833531		-1.11175	-0.806045	-1.04485		-1.1258	-0.770481	-1.00937	-1.07726	-0.784893	-1.02744
467	1.24026	0.320264	0.387594		-1.19101	-0.797028	-0.901906		-1.20013	-0.777417	-0.867457	-1.1603	-0.770206	-0.889318
468	0.286519	0.242729	1.28595		-0.903511	-0.803054	-1.2439		-0.874105	-0.7995	-1.24423	-0.889647	-0.782637	-1.22251
469	0.304553	0.228983	1.1307		-0.941076	-0.770975	-1.23542		-0.918381	-0.738577	-1.23602	-0.940289	-0.744332	-1.19016
470	0.115386	1.27946	0.93338		-0.262727	-1.16509	-1.13607		-0.209313	-1.16614	-1.14449	-0.29659	-1.15748	-1.1197
471	0.998382	1.257	0.52899		-1.0425	-1.101	-0.72673		-1.03544	-1.08558	-0.662875	-1.00427	-1.05412	-0.760186
472	1.29754	0.573869	0.747959		-1.13904	-0.836186	-0.972914		-1.13839	-0.795004	-0.943598	-1.1018	-0.812166	-0.956825
473	1.11612	1.30022	0.831356		-1.01454	-1.06573	-0.873431		-0.986037	-1.04493	-0.857255	-0.983054	-1.04277	-0.830829

## Sheet: Dia
		Aspect ratio				Analytical stress				FEM	CT		FEM	VA
	X	Y	Z		sxx	syy	szz		sxx	syy	szz	sxx	syy	szz
1	0.34546	1.33343	0.30978		-0.770015	-2.35639	-0.672689		-0.821537	-2.6097	-0.682546	-0.843525	-2.33001	-0.747043
2	0.445001	1.34259	0.375745		-0.82585	-2.11778	-0.672706		-0.821328	-2.32636	-0.662317	-0.895455	-2.11604	-0.727812
3	0.389465	0.507128	1.24996		-0.655169	-0.89745	-1.95108		-0.663087	-0.980509	-2.10181	-0.707688	-1.03479	-2.13503
4	0.572327	0.760422	1.33727		-0.69776	-0.965228	-1.60632		-0.715386	-0.997044	-1.74343	-0.745644	-1.05093	-1.69096
5	0.587736	1.15743	1.2996		-0.606554	-1.27213	-1.40683		-0.57495	-1.41803	-1.54047	-0.690014	-1.34528	-1.48834
6	0.562672	1.04327	0.431365		-0.946412	-1.64942	-0.697547		-0.993221	-1.85739	-0.714127	-1.04949	-1.73256	-0.781822
7	0.469297	0.629633	1.03774		-0.704624	-0.982912	-1.54754		-0.722003	-1.02912	-1.75973	-0.793214	-1.12323	-1.68518
8	1.09293	0.379623	0.342347		-2.02716	-0.80404	-0.710084		-2.21972	-0.833148	-0.726571	-2.14467	-0.906138	-0.786575
9	0.323248	0.2797	1.44181		-0.770347	-0.641908	-2.53309		-0.850191	-0.637228	-2.74945	-0.864597	-0.744208	-2.59703
10	0.363608	1.36028	0.288697		-0.827535	-2.3932	-0.621089		-0.853109	-2.61226	-0.615831	-0.925199	-2.40787	-0.672137
11	1.56365	0.384879	0.282152		-2.5296	-0.856876	-0.579727		-2.71126	-0.886886	-0.576152	-2.54047	-0.927321	-0.645173
12	1.26443	0.516333	1.18191		-1.4553	-0.556474	-1.37508		-1.61562	-0.509917	-1.52307	-1.51442	-0.630311	-1.43785
13	1.07667	0.280091	1.16329		-1.74113	-0.389977	-1.83842		-1.84452	-0.341219	-1.96275	-1.77732	-0.444063	-1.87645
14	0.218572	0.255823	1.08225		-0.640974	-0.781501	-2.48408		-0.643445	-0.82467	-2.6806	-0.751827	-0.870142	-2.59857
15	1.03477	1.16401	0.487214		-1.31604	-1.45463	-0.576003		-1.46108	-1.55175	-0.559247	-1.38254	-1.55487	-0.643351
16	0.945242	1.24588	0.519351		-1.18742	-1.50892	-0.609167		-1.28702	-1.62085	-0.587037	-1.25019	-1.58239	-0.671498
17	0.273052	0.232534	1.15514		-0.782668	-0.639762	-2.48582		-0.775535	-0.645601	-2.70674	-0.86154	-0.701677	-2.50407
18	1.20581	0.289495	1.01955		-1.86379	-0.402087	-1.65297		-2.0118	-0.372455	-1.78549	-1.93819	-0.454586	-1.74771
19	0.696006	1.00041	1.23416		-0.729473	-1.08304	-1.31607		-0.736863	-1.21135	-1.45327	-0.816184	-1.16282	-1.40246
20	0.983064	1.19329	1.32067		-0.847042	-1.03974	-1.14778		-0.891602	-1.16015	-1.28374	-0.945397	-1.14322	-1.25091
21	0.38508	0.279432	1.14459		-0.898106	-0.607319	-2.19399		-0.870541	-0.631628	-2.34024	-0.975078	-0.653552	-2.23285
22	1.23721	0.712851	1.20729		-1.24324	-0.692394	-1.21569		-1.36318	-0.698962	-1.31695	-1.33597	-0.759801	-1.31134
23	1.26688	0.319929	1.11773		-1.81318	-0.409869	-1.65605		-1.96212	-0.361809	-1.80608	-1.8972	-0.462122	-1.72165
24	1.19161	0.356948	0.326413		-2.18402	-0.778868	-0.698271		-2.35593	-0.791761	-0.738654	-2.23308	-0.850012	-0.748712
25	1.26119	1.12009	1.36213		-1.01768	-0.898779	-1.09843		-1.0752	-0.94212	-1.17577	-1.07821	-0.959355	-1.15375
26	1.25803	0.84907	1.42133		-1.12137	-0.734476	-1.25633		-1.20948	-0.733442	-1.39922	-1.20371	-0.816308	-1.33389
27	0.315279	0.385791	1.27357		-0.646976	-0.829171	-2.23774		-0.646521	-0.836474	-2.45519	-0.715668	-0.920686	-2.24979
28	1.41773	0.609176	0.498357		-1.85074	-0.877584	-0.692661		-2.05794	-0.901805	-0.685476	-1.88568	-0.942035	-0.766705
29	1.31303	0.993302	0.728014		-1.35019	-1.04112	-0.740411		-1.49822	-1.06695	-0.747728	-1.41548	-1.1404	-0.793294
30	0.376079	0.262153	1.03193		-0.928645	-0.599794	-2.13048		-0.904657	-0.626293	-2.35549	-1.05909	-0.653205	-2.20501
31	0.37218	1.01261	0.30476		-0.853536	-2.02134	-0.671529		-0.880201	-2.20111	-0.688476	-0.952228	-2.09621	-0.731983
32	0.370044	0.318303	0.952996		-0.840012	-0.70223	-1.9317		-0.896201	-0.757687	-2.14664	-0.978068	-0.801118	-2.16927
33	0.245448	0.265401	1.01722		-0.687795	-0.758084	-2.33122		-0.723672	-0.817457	-2.53022	-0.779247	-0.89059	-2.51304
34	0.350534	1.27445	0.279123		-0.829395	-2.36019	-0.625264		-0.889272	-2.55448	-0.614701	-0.884301	-2.34792	-0.689988
35	0.40146	1.1435	0.317791		-0.862509	-2.09267	-0.650252		-0.860506	-2.25586	-0.674399	-0.952226	-2.17885	-0.706291
36	0.653692	1.03891	0.792159		-0.804611	-1.28537	-0.991574		-0.825554	-1.45375	-1.02076	-0.879606	-1.36886	-1.0967
37	1.25912	0.910839	1.53247		-1.06862	-0.752265	-1.28479		-1.11775	-0.780612	-1.39766	-1.16499	-0.804262	-1.38448
38	1.39533	0.440471	0.524389		-1.9815	-0.68631	-0.845614		-2.19682	-0.678604	-0.905121	-2.03378	-0.764728	-0.931021
39	0.987742	0.282216	1.09101		-1.66339	-0.412801	-1.78782		-1.78549	-0.369034	-1.97344	-1.8207	-0.457176	-1.91765
40	1.30113	1.12774	0.808514		-1.24425	-1.08738	-0.760238		-1.33142	-1.16044	-0.78877	-1.33846	-1.19027	-0.82708
41	1.11282	0.513959	0.727537		-1.50493	-0.69293	-1.02395		-1.65876	-0.70974	-1.05889	-1.63328	-0.74469	-1.16703
42	1.08677	0.607285	0.559292		-1.51562	-0.875379	-0.797652		-1.68963	-0.906937	-0.792528	-1.59107	-0.964421	-0.86891
43	0.602414	1.1175	0.344414		-1.09495	-1.83103	-0.570749		-1.19337	-1.99375	-0.569481	-1.29961	-1.89252	-0.631166
44	0.767748	1.38111	0.696902		-0.880089	-1.52794	-0.7888		-0.928463	-1.66753	-0.791674	-0.937455	-1.59985	-0.857608
45	0.764805	1.19368	1.07135		-0.766478	-1.21759	-1.09932		-0.790786	-1.33629	-1.18622	-0.836222	-1.32123	-1.20636
46	0.250168	1.18985	0.197229		-0.806386	-2.65186	-0.595984		-0.783995	-2.81125	-0.614304	-0.885392	-2.66066	-0.638264
47	1.34308	0.406519	0.459741		-2.05477	-0.698537	-0.810384		-2.23236	-0.68316	-0.835841	-2.08649	-0.767061	-0.86945
48	0.295265	0.33551	1.26963		-0.665818	-0.780498	-2.34541		-0.679671	-0.781875	-2.5463	-0.725882	-0.843782	-2.37184
49	1.05679	1.22702	1.24663		-0.898244	-1.04897	-1.06559		-0.937494	-1.09784	-1.14842	-0.962436	-1.12856	-1.13133
50	0.721171	0.988326	1.31499		-0.736742	-1.04155	-1.35822		-0.741631	-1.14224	-1.5244	-0.820496	-1.11963	-1.43469
51	1.34388	1.08616	0.805409		-1.28674	-1.053	-0.761223		-1.4164	-1.15663	-0.784177	-1.38855	-1.13508	-0.848271
52	0.168473	1.07726	1.16051		-0.273195	-2.16755	-2.25984		-0.247072	-2.21857	-2.42953	-0.302345	-2.27116	-2.27552
53	0.783663	1.17811	1.23825		-0.744539	-1.14931	-1.20413		-0.76921	-1.2454	-1.30839	-0.816181	-1.25515	-1.31182
54	1.26578	0.509376	0.399647		-1.94707	-0.886219	-0.663873		-2.13985	-0.907744	-0.65655	-2.0151	-0.975902	-0.726001
55	0.558964	0.411623	1.04563		-0.963407	-0.677122	-1.6818		-0.999605	-0.683114	-1.87779	-1.06294	-0.740328	-1.76991
56	0.606905	0.57519	1.24156		-0.838297	-0.788227	-1.63371		-0.852346	-0.790741	-1.82397	-0.916153	-0.858709	-1.6849
57	0.968066	1.31608	0.397829		-1.3574	-1.7317	-0.495714		-1.46903	-1.85959	-0.447533	-1.40521	-1.7833	-0.55205
58	1.25052	0.603309	1.18701		-1.34923	-0.619678	-1.28889		-1.49423	-0.588762	-1.42316	-1.41721	-0.691265	-1.35612
59	0.336763	0.281561	1.2188		-0.807829	-0.647302	-2.32616		-0.80853	-0.660313	-2.5257	-0.878042	-0.699271	-2.32913
60	1.20961	0.927563	1.43139		-1.05043	-0.789621	-1.23323		-1.09811	-0.815497	-1.34634	-1.13348	-0.86498	-1.34405
61	1.24336	0.44867	0.27363		-2.22838	-0.997322	-0.545826		-2.42621	-0.967687	-0.555697	-2.24478	-1.07943	-0.585153
62	0.69179	1.20281	0.409081		-1.0883	-1.7406	-0.593586		-1.1305	-1.90458	-0.593982	-1.18884	-1.85247	-0.65739
63	1.21539	0.606121	0.31614		-1.97743	-1.13449	-0.525999		-2.12915	-1.17367	-0.510128	-2.03929	-1.23411	-0.572351
64	1.01567	0.220484	0.269804		-2.38327	-0.632844	-0.813815		-2.54792	-0.649525	-0.826698	-2.44491	-0.703707	-0.919936
65	1.2046	1.30476	0.855717		-1.10984	-1.197	-0.770994		-1.19548	-1.27251	-0.796291	-1.17822	-1.28283	-0.827639
66	0.276881	1.13524	0.257322		-0.748383	-2.40247	-0.68329		-0.728232	-2.6392	-0.718254	-0.824325	-2.38351	-0.744048
67	1.17524	0.292635	0.349146		-2.24441	-0.656259	-0.815414		-2.47909	-0.665941	-0.835583	-2.26138	-0.730995	-0.913292
68	0.771404	0.270544	1.19772		-1.44097	-0.428363	-1.98928		-1.53149	-0.41257	-2.13956	-1.57368	-0.476003	-2.13546
69	0.734375	1.30725	1.20374		-0.694472	-1.27473	-1.18211		-0.70823	-1.40879	-1.24356	-0.753137	-1.34602	-1.2723
70	0.308095	1.41021	0.251743		-0.793447	-2.59234	-0.614431		-0.825255	-2.8212	-0.608588	-0.869752	-2.58409	-0.689955
71	0.455329	0.377169	0.969025		-0.886943	-0.712327	-1.74819		-0.992884	-0.704875	-1.92282	-0.995772	-0.817228	-1.92633
72	0.73423	0.91058	1.25724		-0.780284	-0.988264	-1.34109		-0.804948	-1.03841	-1.45233	-0.840664	-1.07279	-1.42581
73	1.1282	0.656618	0.548859		-1.52604	-0.923457	-0.75407		-1.66594	-0.945041	-0.755991	-1.60498	-1.01436	-0.810475
74	0.52975	1.25334	0.6311		-0.730145	-1.6687	-0.893609		-0.719681	-1.85959	-0.903557	-0.786077	-1.73109	-0.982988
75	1.05043	0.830983	0.657456		-1.27381	-1.01895	-0.790488		-1.45123	-1.19335	-0.841257	-1.46139	-1.19758	-0.90486
76	1.22442	0.257369	0.330568		-2.39423	-0.613489	-0.837977		-2.5981	-0.63116	-0.820691	-2.37943	-0.66032	-0.927843
77	1.33061	0.990689	0.445029		-1.65757	-1.30251	-0.528445		-1.79594	-1.3692	-0.497482	-1.72788	-1.3998	-0.576036
78	0.241171	0.207378	1.08127		-0.772545	-0.638617	-2.54234		-0.802705	-0.674122	-2.6609	-0.8628	-0.721557	-2.66447
79	1.21408	0.888521	1.02021		-1.18115	-0.859774	-0.996237		-1.30156	-0.906833	-1.04551	-1.28974	-0.942266	-1.10298
80	1.11496	1.33279	1.14713		-0.933692	-1.11815	-0.962057		-0.995771	-1.22199	-1.01946	-1.02406	-1.22667	-1.05149
81	0.330166	0.312564	1.33181		-0.742615	-0.693811	-2.37405		-0.763895	-0.707075	-2.59195	-0.80695	-0.754255	-2.34591
82	0.30224	1.15472	0.18669		-0.952323	-2.56845	-0.519549		-1.0161	-2.71119	-0.500597	-1.07501	-2.66626	-0.568738
83	0.464099	0.247424	1.12566		-1.09235	-0.51136	-2.17177		-1.11811	-0.501783	-2.38916	-1.20775	-0.574969	-2.2633
84	0.219425	0.260219	1.19434		-0.627584	-0.779257	-2.57782		-0.654659	-0.82059	-2.78338	-0.706472	-0.885418	-2.61198
85	0.318082	1.26794	0.930998		-0.43685	-1.86944	-1.48524		-0.38939	-2.00696	-1.60151	-0.490774	-1.96202	-1.60019
86	0.943086	0.775523	1.15506		-1.0113	-0.819418	-1.22954		-1.12447	-0.89749	-1.3449	-1.12992	-0.945957	-1.39036
87	0.449523	1.19863	1.02952		-0.541301	-1.53569	-1.35389		-0.505776	-1.70594	-1.48503	-0.610279	-1.59737	-1.41705
88	1.17142	1.04613	0.22159		-2.04349	-1.90034	-0.334364		-2.19319	-2.0217	-0.293353	-2.09902	-1.95766	-0.375107
89	0.419665	1.28008	1.12817		-0.489614	-1.61976	-1.46557		-0.475734	-1.74659	-1.51291	-0.524788	-1.67368	-1.55671
90	1.05239	0.512978	0.833592		-1.40239	-0.666364	-1.13732		-1.58902	-0.661651	-1.20195	-1.48795	-0.738131	-1.25274
91	1.2403	0.320397	0.387612		-2.19626	-0.655747	-0.827842		-2.43771	-0.66921	-0.823714	-2.26133	-0.726127	-0.943562
92	1.14101	0.376759	0.41389		-1.97378	-0.720489	-0.806327		-2.17884	-0.728925	-0.802629	-2.01146	-0.790873	-0.880845
93	1.10463	1.27923	0.697037		-1.14722	-1.31191	-0.69614		-1.23415	-1.43425	-0.705756	-1.24216	-1.41374	-0.771949
94	0.286494	0.242761	1.28581		-0.778983	-0.632002	-2.55145		-0.785381	-0.651411	-2.70554	-0.858339	-0.681866	-2.58596
95	0.305265	0.229564	1.1226		-0.855143	-0.599647	-2.4072		-0.915699	-0.616608	-2.58186	-0.998305	-0.660118	-2.46186
96	0.116683	1.27542	0.933243		-0.21379	-2.68827	-2.32561		-0.184352	-2.79008	-2.48068	-0.248804	-2.70668	-2.30058
97	0.774624	0.707153	1.13913		-0.922266	-0.834444	-1.33789		-1.03129	-0.933938	-1.495	-1.0691	-0.979226	-1.54596
98	1.29754	0.573866	0.747972		-1.58196	-0.709417	-0.95914		-1.78403	-0.716412	-1.02068	-1.68033	-0.790076	-1.07095
99	0.274583	1.15128	0.258609		-0.740509	-2.41942	-0.687362		-0.772757	-2.64745	-0.65608	-0.808035	-2.41856	-0.754795
100	1.18497	0.290748	0.269251		-2.39795	-0.750612	-0.682115		-2.59832	-0.748113	-0.68103	-2.40699	-0.811138	-0.741057
101	1.16817	0.706044	0.591473		-1.48847	-0.930448	-0.762508		-1.64742	-0.957123	-0.762295	-1.56369	-1.01083	-0.830221
102	1.19098	0.711835	0.807883		-1.35669	-0.8139	-0.935696		-1.49444	-0.86293	-0.990252	-1.4668	-0.899521	-1.03325
103	1.14151	0.336122	0.427144		-2.02556	-0.655501	-0.874266		-2.16104	-0.734224	-0.829469	-2.11533	-0.708502	-0.985912
104	0.387553	1.00705	0.353527		-0.813967	-1.90766	-0.729989		-0.883084	-1.98928	-0.784495	-0.907487	-2.03143	-0.81427
105	0.512779	0.372105	1.34598		-0.915029	-0.622158	-2.05556		-0.928672	-0.641018	-2.22748	-1.05143	-0.655584	-2.19978
106	1.21423	1.16652	0.728987		-1.22708	-1.18242	-0.715895		-1.36444	-1.30099	-0.713252	-1.31594	-1.27172	-0.791516
107	0.594986	1.3591	0.525532		-0.847636	-1.78667	-0.733077		-0.870947	-1.97542	-0.743381	-0.942229	-1.86846	-0.797977
108	1.1547	1.24794	0.327284		-1.67437	-1.77151	-0.413555		-1.80419	-1.90525	-0.370351	-1.71931	-1.81025	-0.462748
109	1.33242	0.359045	0.420651		-2.16575	-0.671725	-0.814937		-2.38019	-0.668661	-0.869291	-2.18332	-0.745473	-0.897249
110	0.627189	0.582453	1.43674		-0.826667	-0.758289	-1.76189		-0.846019	-0.776744	-1.99057	-0.957952	-0.808247	-1.95079
111	0.296329	1.10085	1.3524		-0.382942	-1.68682	-1.94608		-0.331539	-1.86464	-2.06431	-0.448193	-1.7192	-2.00653
112	1.33881	0.377721	0.756609		-1.87242	-0.526446	-1.18234		-2.066	-0.529941	-1.23758	-2.00208	-0.597934	-1.31165
113	1.16711	0.908186	0.738161		-1.27513	-1.00317	-0.801192		-1.41711	-1.05628	-0.83024	-1.36389	-1.10228	-0.876062
114	0.709515	1.31448	0.267664		-1.35815	-2.12564	-0.429638		-1.4994	-2.3094	-0.381408	-1.45671	-2.24108	-0.499171
115	1.19977	0.637881	0.781922		-1.43103	-0.763806	-0.958303		-1.60318	-0.779183	-1.01387	-1.51112	-0.837014	-1.05791
116	1.25904	1.03463	1.19403		-1.09043	-0.890797	-1.03465		-1.14927	-0.937274	-1.10861	-1.17887	-0.961085	-1.11355
117	0.471312	1.15192	0.393613		-0.860748	-1.8917	-0.695457		-0.888514	-2.12906	-0.732675	-0.97496	-1.99084	-0.778891
118	1.04602	1.29474	0.866955		-1.00516	-1.23471	-0.82118		-1.05107	-1.32166	-0.854374	-1.10154	-1.33193	-0.883339
119	1.05497	1.31615	0.402513		-1.42611	-1.69675	-0.483629		-1.56657	-1.77706	-0.449192	-1.49445	-1.84066	-0.533128
120	0.389541	0.447767	1.13288		-0.710131	-0.838005	-1.90564		-0.719692	-0.860411	-2.11604	-0.779373	-0.931363	-1.95734
121	0.417586	1.37217	0.474157		-0.697768	-2.04655	-0.813452		-0.705625	-2.31322	-0.829227	-0.780916	-2.06883	-0.916426
122	0.178733	0.284478	1.22315		-0.515698	-0.931643	-2.67945		-0.515703	-0.925072	-2.84538	-0.55687	-1.04097	-2.69473
123	0.306802	1.258	0.851287		-0.442446	-1.91577	-1.43083		-0.406136	-2.07241	-1.5629	-0.508009	-1.99336	-1.49464
124	1.09677	0.904328	0.243492		-1.93225	-1.68906	-0.384644		-2.10758	-1.89063	-0.34453	-2.13481	-1.86809	-0.438012
125	0.341756	0.399664	1.00854		-0.702094	-0.845784	-1.91286		-0.719347	-0.871879	-2.11158	-0.756802	-0.941127	-1.9819
126	1.43875	0.522039	0.386576		-2.09714	-0.898399	-0.62486		-2.29251	-0.91586	-0.616689	-2.08905	-0.966514	-0.677706
127	0.373895	0.968892	1.13673		-0.496632	-1.43272	-1.62715		-0.446566	-1.58261	-1.80563	-0.567749	-1.51821	-1.70146
128	1.00564	1.11308	1.24598		-0.898839	-1.00015	-1.11853		-0.960263	-1.09299	-1.23056	-0.983975	-1.08477	-1.20024
129	0.336043	0.411248	1.24326		-0.657183	-0.840357	-2.13975		-0.651785	-0.857492	-2.32034	-0.714933	-0.910154	-2.16171
130	0.257202	1.36806	0.43216		-0.523002	-2.39094	-0.994346		-0.520116	-2.62613	-1.01684	-0.577606	-2.40985	-1.13404
131	1.10712	0.552327	0.463804		-1.67806	-0.891662	-0.728848		-1.80781	-0.938844	-0.734739	-1.75056	-0.958096	-0.788717
132	0.745951	1.36548	0.652463		-0.891684	-1.56421	-0.765775		-0.889922	-1.75541	-0.784795	-0.980115	-1.62699	-0.835798
133	0.306479	1.25979	0.386912		-0.634599	-2.24133	-0.845155		-0.625127	-2.47542	-0.880765	-0.699589	-2.24955	-0.936731
134	0.991589	1.18297	0.164406		-2.09802	-2.31692	-0.275305		-2.24547	-2.51327	-0.234916	-2.20232	-2.37465	-0.317226
135	0.25901	0.166948	1.20899		-0.909768	-0.518866	-2.74581		-0.91174	-0.513875	-2.9399	-1.00874	-0.571069	-2.7382
136	0.513101	1.09512	1.18133		-0.581845	-1.33011	-1.4191		-0.548832	-1.45537	-1.55425	-0.65812	-1.41262	-1.50047
137	1.17352	0.786381	0.74714		-1.33265	-0.903419	-0.854075		-1.52225	-0.983847	-0.931085	-1.51172	-1.03608	-0.982757
138	1.19877	0.291578	0.326025		-2.30444	-0.6765	-0.776793		-2.56351	-0.689432	-0.819504	-2.30322	-0.763193	-0.863353
139	1.29751	0.535846	0.434053		-1.8996	-0.875736	-0.682264		-2.07888	-0.896027	-0.690036	-1.93977	-0.948597	-0.737709
140	1.22537	0.965802	0.486594		-1.52613	-1.24589	-0.580935		-1.73818	-1.39851	-0.573324	-1.74157	-1.43286	-0.651572
141	1.05666	0.864251	0.271281		-1.82075	-1.56984	-0.42614		-1.99914	-1.67614	-0.384338	-1.93777	-1.70968	-0.482858
142	0.317804	1.16985	0.29446		-0.76163	-2.28527	-0.693418		-0.761967	-2.4672	-0.690635	-0.836012	-2.3611	-0.75158
143	1.18759	0.301499	0.192606		-2.57984	-0.930946	-0.529176		-2.77525	-0.951258	-0.515933	-2.58822	-1.00511	-0.57865
144	0.331283	1.20698	0.197219		-0.977874	-2.54152	-0.510413		-0.97075	-2.74179	-0.524142	-1.09603	-2.6213	-0.555471
145	0.339499	0.269608	1.16518		-0.837389	-0.630115	-2.29822		-0.839469	-0.636379	-2.49742	-0.948237	-0.680484	-2.3236
146	0.517345	1.31793	0.394147		-0.896091	-1.99224	-0.647324		-0.928048	-2.20311	-0.630735	-0.992935	-2.03455	-0.707773
147	0.266203	0.375141	1.27323		-0.583649	-0.893003	-2.35495		-0.602076	-0.895087	-2.51898	-0.636185	-1.0047	-2.44271
148	1.09815	0.490429	0.330486		-1.92756	-0.975705	-0.611309		-2.12399	-1.00407	-0.617823	-2.1141	-1.13339	-0.65795
149	0.609868	0.544447	1.1974		-0.869834	-0.763736	-1.62353		-0.915813	-0.777378	-1.81187	-0.957492	-0.840238	-1.70149
150	1.02357	0.153656	0.289205		-2.58379	-0.473697	-1.04756		-2.74633	-0.467964	-1.07907	-2.6038	-0.530236	-1.13941
151	1.01811	1.14356	1.3199		-0.88122	-0.996576	-1.14792		-0.94031	-1.06552	-1.22725	-0.966481	-1.07882	-1.24116
152	0.357824	1.19335	0.392873		-0.707831	-2.08095	-0.792822		-0.722013	-2.25995	-0.81568	-0.767578	-2.09966	-0.855368
153	1.18156	0.235157	0.979272		-2.01939	-0.355994	-1.78187		-2.15881	-0.313625	-1.9372	-2.08571	-0.407979	-1.84519
154	1.14789	1.23624	0.852107		-1.09192	-1.17218	-0.795965		-1.18757	-1.24321	-0.839448	-1.18483	-1.30628	-0.871369
155	1.02083	0.415262	0.308661		-1.96836	-0.913087	-0.641022		-2.10904	-0.934355	-0.642505	-2.06904	-1.05216	-0.674056
156	0.171767	0.270349	1.20008		-0.517233	-0.922549	-2.7048		-0.548602	-1.00024	-2.9834	-0.59731	-1.11128	-2.81017
157	1.17421	0.465197	0.547494		-1.74189	-0.723577	-0.874705		-1.95488	-0.725591	-0.898949	-1.7859	-0.794274	-0.958484
158	1.15075	1.05138	0.807299		-1.16976	-1.07241	-0.810238		-1.26304	-1.16122	-0.847678	-1.26618	-1.16501	-0.893827
159	1.03416	0.861109	1.36797		-0.985595	-0.807593	-1.28843		-1.0341	-0.839543	-1.40764	-1.06628	-0.869874	-1.36369
160	1.20102	1.14737	0.785129		-1.18733	-1.13722	-0.760101		-1.30386	-1.25083	-0.788349	-1.29442	-1.24288	-0.837323
161	0.824824	1.04888	1.29132		-0.793524	-1.02867	-1.25439		-0.82573	-1.09579	-1.33986	-0.864974	-1.11811	-1.35198
162	1.27224	0.277073	0.369383		-2.33694	-0.60514	-0.86398		-2.57927	-0.606374	-0.841109	-2.34309	-0.663504	-0.971149
163	0.787166	1.01971	1.25766		-0.783122	-1.03617	-1.26463		-0.811586	-1.09709	-1.36888	-0.860082	-1.12309	-1.36435
164	1.25133	1.36701	0.567968		-1.34594	-1.45039	-0.567213		-1.49586	-1.59463	-0.522922	-1.40138	-1.51942	-0.640752
165	0.474869	0.424538	1.22931		-0.822943	-0.720423	-1.91492		-0.814585	-0.752163	-2.1099	-0.902033	-0.794996	-1.9692
166	0.449711	0.700999	0.943506		-0.672555	-1.10054	-1.43803		-0.717906	-1.26755	-1.67957	-0.814598	-1.32495	-1.6673
167	0.567531	1.04364	0.731281		-0.753042	-1.38988	-0.99682		-0.766805	-1.54857	-1.07714	-0.829117	-1.46549	-1.07584
168	1.0504	0.364207	1.16031		-1.52092	-0.470911	-1.64312		-1.59772	-0.482868	-1.71518	-1.59602	-0.540707	-1.77742
169	0.990575	1.09692	0.715276		-1.09594	-1.20717	-0.774048		-1.18575	-1.335	-0.811088	-1.2181	-1.32316	-0.842026
170	1.17374	0.574117	0.701979		-1.51116	-0.74804	-0.938482		-1.68635	-0.762561	-0.972483	-1.58694	-0.814417	-1.03127
171	0.308609	1.34041	0.265604		-0.775282	-2.50793	-0.642041		-0.776734	-2.71273	-0.640916	-0.845727	-2.48178	-0.69715
172	0.248337	1.19981	0.251404		-0.69726	-2.53276	-0.708529		-0.774229	-2.71872	-0.736026	-0.8289	-2.61654	-0.783359
173	1.05825	1.16741	0.727249		-1.1197	-1.22769	-0.749303		-1.17963	-1.37344	-0.772663	-1.23725	-1.32275	-0.820651
174	1.3054	0.318846	0.415275		-2.22128	-0.625016	-0.86395		-2.43926	-0.62566	-0.87595	-2.2374	-0.68071	-0.964076
175	0.299992	0.215649	1.19192		-0.868887	-0.573842	-2.51764		-0.90626	-0.582714	-2.71287	-0.974614	-0.639094	-2.57579
176	1.06721	1.31163	0.472839		-1.33151	-1.57846	-0.537663		-1.4863	-1.71359	-0.486212	-1.39265	-1.68253	-0.619202
177	0.507515	1.21152	0.445549		-0.843035	-1.83733	-0.723282		-0.878891	-2.06684	-0.726029	-0.976917	-1.93756	-0.810044
178	1.29359	0.456464	0.428322		-1.98688	-0.789935	-0.731994		-2.19991	-0.806878	-0.753717	-1.99917	-0.859951	-0.796438
179	0.973551	1.19014	0.446034		-1.31193	-1.55117	-0.550897		-1.43499	-1.7198	-0.515097	-1.43513	-1.65529	-0.628704
180	1.15283	0.474583	1.33852		-1.39227	-0.520662	-1.5722		-1.47114	-0.493877	-1.712	-1.4854	-0.582655	-1.65647
181	0.375006	1.29684	0.457632		-0.666456	-2.06601	-0.84777		-0.670309	-2.31358	-0.884915	-0.746422	-2.15295	-0.960811
182	0.670722	1.22933	0.827421		-0.767165	-1.40449	-0.968437		-0.788497	-1.49843	-1.02556	-0.830388	-1.5189	-1.0541
183	1.34494	0.510218	0.598502		-1.78938	-0.717867	-0.865402		-1.99304	-0.721557	-0.890652	-1.82981	-0.782024	-0.94205
184	1.36111	0.940303	0.35481		-1.85928	-1.40233	-0.459347		-1.99245	-1.52081	-0.429689	-1.92632	-1.46684	-0.513864
185	0.652448	0.764576	1.20922		-0.7813	-0.932601	-1.43642		-0.795702	-0.993756	-1.58989	-0.851614	-1.04216	-1.55525
186	0.93421	1.38308	0.523182		-1.15067	-1.61082	-0.59696		-1.24641	-1.74551	-0.559196	-1.20458	-1.65921	-0.657852
187	0.485501	1.06462	0.345132		-0.952451	-1.8712	-0.637137		-0.992835	-2.02977	-0.637849	-1.09297	-2.04224	-0.687392
188	1.08993	1.1857	1.01807		-0.99657	-1.08425	-0.928077		-1.04702	-1.20333	-0.990804	-1.0975	-1.18191	-1.02473
189	0.757103	0.608356	1.12415		-0.972307	-0.762759	-1.40834		-1.00311	-0.77781	-1.58039	-1.07031	-0.829596	-1.48662
190	1.24025	0.562954	0.740546		-1.5523	-0.711289	-0.970499		-1.71528	-0.726115	-1.01945	-1.62164	-0.772776	-1.04337
191	1.12096	1.24446	0.535123		-1.31122	-1.43387	-0.583874		-1.45431	-1.56606	-0.543486	-1.36348	-1.48745	-0.658314
192	0.557071	0.422601	1.3361		-0.907225	-0.653467	-1.92858		-0.956257	-0.685699	-2.22283	-1.06164	-0.75292	-2.04025
193	1.02835	0.223636	0.334308		-2.28392	-0.570251	-0.934812		-2.44924	-0.576744	-1.00347	-2.41776	-0.622435	-1.05844
194	1.03679	1.33652	0.875436		-0.986611	-1.26013	-0.821567		-1.07116	-1.3999	-0.860728	-1.07031	-1.35271	-0.910902
195	0.337765	1.14046	1.26563		-0.422352	-1.63507	-1.76509		-0.367189	-1.80421	-1.92277	-0.482393	-1.67941	-1.81822
196	0.433003	0.395114	1.41921		-0.782049	-0.699473	-2.16455		-0.778177	-0.696368	-2.38675	-0.853291	-0.75384	-2.1451
197	0.876078	1.25002	1.12874		-0.813088	-1.17423	-1.06432		-0.849429	-1.27896	-1.13191	-0.899977	-1.27252	-1.14872
198	1.13039	0.568238	0.505271		-1.63903	-0.869026	-0.759335		-1.81033	-0.882617	-0.769294	-1.72049	-0.963289	-0.816846
199	1.25486	0.394998	0.363413		-2.12515	-0.782609	-0.707277		-2.40686	-0.811611	-0.728974	-2.12832	-0.880908	-0.801948
200	0.747406	0.895456	1.24055		-0.798129	-0.972908	-1.3274		-0.819	-1.00828	-1.49523	-0.877176	-1.08218	-1.4175
201	1.19106	0.950613	0.340164		-1.74776	-1.46958	-0.462398		-1.89569	-1.59126	-0.404264	-1.80613	-1.54436	-0.528784
202	1.12969	0.992923	0.738588		-1.21526	-1.07485	-0.783048		-1.32281	-1.14724	-0.816774	-1.32829	-1.19169	-0.853802
203	1.26238	0.420977	0.161414		-2.62931	-1.28055	-0.389509		-2.82368	-1.3294	-0.377185	-2.73729	-1.44542	-0.427797
204	1.13833	1.28544	0.686216		-1.17725	-1.31445	-0.680266		-1.37744	-1.48046	-0.679723	-1.33645	-1.49546	-0.770491
205	0.70222	1.21726	0.726189		-0.838268	-1.42969	-0.870319		-0.874804	-1.60566	-0.891018	-0.922517	-1.52116	-0.95318
206	1.31728	0.763928	0.655562		-1.51575	-0.911674	-0.767055		-1.69295	-0.978602	-0.786747	-1.58239	-0.991839	-0.843395
207	0.496703	0.460081	1.01984		-0.84667	-0.775293	-1.64953		-0.886647	-0.811719	-1.8255	-0.941336	-0.867088	-1.76928
208	0.287869	1.25049	0.152854		-1.02714	-2.78794	-0.458043		-1.11263	-3.03286	-0.443748	-1.24854	-2.85918	-0.524406
209	0.298306	1.14841	0.35181		-0.664998	-2.2033	-0.814174		-0.68479	-2.38423	-0.822508	-0.721901	-2.21476	-0.875341
210	0.338017	1.13712	1.37165		-0.412268	-1.61381	-1.8486		-0.377888	-1.7198	-2.00568	-0.452491	-1.75861	-1.94692
211	1.37066	0.327332	0.872433		-1.95102	-0.447124	-1.39068		-2.08375	-0.402551	-1.54836	-2.02527	-0.514498	-1.47646
212	1.2316	0.462752	0.487922		-1.85428	-0.754047	-0.802766		-2.04614	-0.765634	-0.852682	-1.90438	-0.816322	-0.881646
213	0.894876	0.713232	1.2509		-0.990181	-0.771433	-1.35775		-1.07792	-0.809656	-1.50989	-1.1044	-0.85405	-1.48686
214	0.880555	0.493905	1.17114		-1.17391	-0.616103	-1.50503		-1.2588	-0.6204	-1.66233	-1.30377	-0.68408	-1.63769
215	0.74448	1.03926	1.27705		-0.745045	-1.07052	-1.2979		-0.764384	-1.17222	-1.44248	-0.825389	-1.15037	-1.38234
216	0.296747	1.17013	0.255666		-0.784903	-2.40295	-0.652008		-0.769712	-2.62235	-0.673134	-0.874799	-2.41476	-0.706904
217	0.279284	0.324775	1.28514		-0.650556	-0.785648	-2.4078		-0.668196	-0.763243	-2.63728	-0.704043	-0.883828	-2.41744
218	1.25604	0.565671	0.653583		-1.61852	-0.75141	-0.886708		-1.79257	-0.781661	-0.924836	-1.68217	-0.815347	-0.963684
219	1.1266	1.30604	0.289575		-1.73525	-1.92159	-0.377999		-1.83554	-2.05774	-0.338401	-1.81144	-1.99095	-0.42069
220	0.571165	0.750631	1.16286		-0.726432	-0.986777	-1.47642		-0.740865	-1.09751	-1.66549	-0.803635	-1.15901	-1.656
221	1.4423	0.614445	0.833379		-1.60205	-0.690803	-0.977902		-1.77156	-0.697377	-1.00571	-1.67063	-0.750031	-1.06388
222	0.300483	1.32699	0.256122		-0.777887	-2.53108	-0.636162		-0.814448	-2.78888	-0.631651	-0.86551	-2.48761	-0.716732
223	0.306525	1.40494	0.317498		-0.693566	-2.46408	-0.725166		-0.728891	-2.7029	-0.722813	-0.76117	-2.4491	-0.808957
224	0.396954	1.13041	0.503726		-0.680238	-1.83366	-0.900379		-0.685636	-1.97179	-0.946171	-0.743828	-1.96903	-0.993633
225	1.25666	1.11861	0.470482		-1.52604	-1.38647	-0.533863		-1.62697	-1.48722	-0.499536	-1.572	-1.42415	-0.582015
226	0.292491	0.246594	1.14396		-0.795431	-0.642986	-2.40659		-0.870496	-0.6441	-2.61509	-0.867043	-0.708463	-2.40723
227	0.432239	0.230429	1.17114		-1.07719	-0.499606	-2.29403		-1.08923	-0.515223	-2.52344	-1.21926	-0.558272	-2.38681
228	1.1544	0.302999	0.274384		-2.33657	-0.767378	-0.678613		-2.51732	-0.797184	-0.678533	-2.42308	-0.856798	-0.755471
229	0.471966	0.52947	1.20897		-0.73765	-0.844006	-1.78116		-0.764965	-0.893674	-2.01125	-0.8262	-0.956031	-1.90421
230	0.493035	1.18437	1.08254		-0.568164	-1.44976	-1.34352		-0.564068	-1.58455	-1.40842	-0.634801	-1.54144	-1.46123
231	1.19499	0.543995	0.698061		-1.56017	-0.719424	-0.954808		-1.7611	-0.742737	-1.01596	-1.67855	-0.797347	-1.07882
232	1.14684	1.26763	0.538467		-1.32231	-1.44009	-0.578164		-1.44206	-1.58852	-0.538759	-1.39337	-1.5118	-0.650219
233	1.24824	1.26162	0.833106		-1.15966	-1.17132	-0.756134		-1.23319	-1.25317	-0.79014	-1.25274	-1.27991	-0.825467
234	0.702431	1.19804	0.807434		-0.805388	-1.36854	-0.939326		-0.837421	-1.50478	-1.00587	-0.88506	-1.48182	-1.03066
235	0.744446	1.03927	1.27706		-0.745019	-1.07055	-1.29792		-0.764369	-1.172	-1.443	-0.825287	-1.15016	-1.38278
236	0.657573	0.494683	1.12327		-0.971206	-0.702703	-1.5776		-1.03975	-0.740248	-1.72515	-1.0843	-0.773938	-1.72573
237	0.279281	0.324785	1.28508		-0.650545	-0.785676	-2.40773		-0.668297	-0.762888	-2.63818	-0.703999	-0.883761	-2.4175
238	1.25556	0.565714	0.653557		-1.61812	-0.751528	-0.886723		-1.7922	-0.781767	-0.924864	-1.68175	-0.81535	-0.963677
239	0.444615	0.987518	1.33282		-0.52843	-1.30015	-1.66094		-0.494319	-1.41973	-1.84646	-0.606448	-1.38939	-1.75443
240	1.07089	0.26229	1.27917		-1.76793	-0.362084	-1.99231		-1.88365	-0.323101	-2.16021	-1.82008	-0.416286	-2.0104
241	0.772609	1.19718	0.641785		-0.948376	-1.43093	-0.771303		-0.993641	-1.56624	-0.781385	-1.03536	-1.53265	-0.840291
242	1.09867	0.871733	1.32164		-1.03123	-0.804103	-1.23099		-1.08758	-0.836754	-1.35423	-1.13612	-0.877444	-1.33005
243	0.432045	1.42349	0.280898		-0.941183	-2.37737	-0.552307		-0.933255	-2.56064	-0.556777	-1.04159	-2.3966	-0.600083
244	0.364802	1.36143	0.46317		-0.643989	-2.13074	-0.860828		-0.635155	-2.34252	-0.862068	-0.692157	-2.12404	-0.944502
245	0.844651	0.787096	1.34121		-0.896418	-0.828926	-1.39723		-0.924232	-0.841468	-1.56074	-0.974249	-0.898983	-1.46367
246	0.361198	1.18038	1.11613		-0.455764	-1.65005	-1.58086		-0.399608	-1.79315	-1.75481	-0.510709	-1.74295	-1.64984
247	0.447977	0.402987	1.30841		-0.8031	-0.707008	-2.0444		-0.839252	-0.720732	-2.2894	-0.876569	-0.789626	-2.05633
248	0.284419	1.16104	0.330432		-0.663559	-2.27637	-0.798689		-0.686916	-2.45491	-0.836235	-0.723729	-2.3195	-0.881554
249	1.26358	0.456493	1.1067		-1.55469	-0.524126	-1.39502		-1.72271	-0.486613	-1.52331	-1.60922	-0.587843	-1.48469
250	0.37748	1.19495	0.260133		-0.915812	-2.29649	-0.579241		-0.925413	-2.49614	-0.586866	-1.02213	-2.35926	-0.636533
251	0.970767	1.0788	0.386627		-1.42474	-1.5521	-0.516298		-1.55862	-1.73164	-0.480924	-1.61132	-1.74235	-0.580276
252	0.506556	1.15726	0.442646		-0.852092	-1.79291	-0.72767		-0.875452	-2.0043	-0.740763	-0.935515	-1.86196	-0.803517
253	0.38241	1.15941	0.376398		-0.761529	-2.03475	-0.747346		-0.754172	-2.24522	-0.7556	-0.834853	-2.06609	-0.821281
254	1.26225	0.883762	1.19984		-1.15734	-0.797891	-1.10244		-1.26346	-0.825199	-1.19435	-1.24389	-0.863757	-1.19364
255	1.05204	1.18105	0.438545		-1.39244	-1.53125	-0.53076		-1.53632	-1.71041	-0.496983	-1.53579	-1.65866	-0.598341
256	0.85359	1.32298	0.970164		-0.83115	-1.28913	-0.95547		-0.858825	-1.41146	-1.00818	-0.909241	-1.3927	-1.03973
257	0.105438	0.235003	1.15738		-0.399355	-1.12483	-2.99397		-0.415704	-1.13211	-3.14946	-0.44244	-1.29057	-3.1177
258	0.509424	1.02571	0.52933		-0.806438	-1.57147	-0.842577		-0.871575	-1.67083	-0.909157	-0.872282	-1.69962	-0.939522
259	0.368507	1.42874	0.441545		-0.658792	-2.20281	-0.822236		-0.68186	-2.44295	-0.842049	-0.727337	-2.24353	-0.923646
260	0.307756	0.247708	1.15488		-0.820944	-0.626654	-2.38857		-0.800307	-0.639099	-2.56608	-0.893792	-0.668433	-2.40272
261	0.550943	1.56782	0.489584		-0.811815	-2.02258	-0.704482		-0.796547	-2.1905	-0.716975	-0.895047	-2.0523	-0.751416
262	1.3226	0.466026	1.02012		-1.61091	-0.540097	-1.29992		-1.73888	-0.520236	-1.34998	-1.6556	-0.583348	-1.39294
263	1.17602	0.296276	0.362274		-2.21873	-0.64925	-0.830842		-2.40208	-0.656013	-0.810258	-2.24722	-0.702013	-0.906621
264	1.12702	0.962925	0.286999		-1.81511	-1.61816	-0.417052		-1.92653	-1.75263	-0.399475	-1.97653	-1.75157	-0.455654
265	0.269666	0.334693	1.33411		-0.620934	-0.814144	-2.45359		-0.641167	-0.782104	-2.65151	-0.669839	-0.894545	-2.43202
266	1.19344	0.256532	0.326216		-2.3747	-0.619032	-0.834688		-2.57277	-0.637404	-0.867435	-2.44899	-0.703452	-0.936982
267	1.18834	0.555705	0.441569		-1.77724	-0.904538	-0.691549		-1.92372	-0.980089	-0.685864	-1.77882	-1.02163	-0.75862
268	0.409728	0.330073	1.29705		-0.840716	-0.645476	-2.19963		-0.867452	-0.668616	-2.40608	-0.962518	-0.723236	-2.32185
269	0.21256	0.202507	0.913344		-0.733245	-0.690341	-2.43996		-0.835788	-0.680443	-2.58246	-0.867354	-0.797431	-2.49492
270	0.306705	1.02842	1.1747		-0.42039	-1.62335	-1.78951		-0.370643	-1.75322	-1.95156	-0.47092	-1.71035	-1.85269
271	0.952284	1.07652	0.505662		-1.24497	-1.38656	-0.623909		-1.36912	-1.53868	-0.604411	-1.35875	-1.50505	-0.708326
272	0.455933	1.33723	0.404726		-0.808085	-2.0568	-0.700025		-0.795701	-2.25776	-0.711966	-0.892132	-2.08404	-0.759777
273	0.184102	1.31774	1.04161		-0.282572	-2.3252	-2.03244		-0.261664	-2.45669	-2.06701	-0.300617	-2.35661	-2.15544
274	0.458569	0.938934	1.18527		-0.5696	-1.26559	-1.54103		-0.556405	-1.34609	-1.66902	-0.616016	-1.36061	-1.61434
275	0.241892	0.292687	1.24517		-0.625757	-0.795795	-2.50891		-0.632994	-0.809069	-2.66763	-0.674289	-0.85777	-2.54792
276	1.18345	1.03691	0.245064		-1.9733	-1.80606	-0.358531		-2.13973	-1.91167	-0.336399	-2.07142	-1.92936	-0.403236
277	0.426576	1.17789	0.39535		-0.79859	-1.96523	-0.729389		-0.821459	-2.17097	-0.744889	-0.89027	-2.05983	-0.810531
278	1.15006	0.275878	0.150078		-2.73421	-1.01655	-0.468755		-2.90255	-1.03338	-0.457739	-2.7846	-1.17568	-0.494015
279	0.41094	1.26502	0.324859		-0.852867	-2.17997	-0.640341		-0.859532	-2.38374	-0.630852	-0.932938	-2.18329	-0.688689
280	1.14826	1.3035	0.2271		-1.9554	-2.11522	-0.317259		-2.07367	-2.23105	-0.276251	-1.99191	-2.1257	-0.356961
281	0.415018	1.12382	0.924693		-0.544144	-1.55915	-1.3262		-0.50243	-1.75646	-1.47446	-0.622684	-1.66582	-1.44539
282	0.38898	0.274611	1.34655		-0.893057	-0.579746	-2.37968		-0.949234	-0.560179	-2.57954	-0.999463	-0.639048	-2.41066
283	1.10791	0.808128	0.692508		-1.3059	-0.964683	-0.815074		-1.43628	-1.01252	-0.83921	-1.40152	-1.0538	-0.898959
284	0.343923	0.298544	1.3158		-0.785025	-0.658506	-2.36536		-0.811552	-0.666319	-2.5914	-0.864248	-0.725138	-2.35003
285	0.978606	1.23485	0.350184		-1.46806	-1.75495	-0.46141		-1.58273	-1.91715	-0.421862	-1.58412	-1.85414	-0.520502
286	1.21877	1.29982	0.777312		-1.16524	-1.23677	-0.720068		-1.28821	-1.32873	-0.722594	-1.23567	-1.32661	-0.796261
287	0.37136	1.15662	0.551468		-0.619925	-1.85705	-0.986895		-0.621006	-2.0348	-0.993377	-0.67307	-1.92337	-1.09392
288	1.27416	0.970495	0.805528		-1.28356	-0.988834	-0.807611		-1.37873	-1.03721	-0.836604	-1.37207	-1.07106	-0.868828
289	0.225917	1.04067	0.165629		-0.844359	-2.66012	-0.568986		-0.913435	-2.76218	-0.575594	-0.98454	-2.74962	-0.620366
290	1.05536	0.494105	0.36061		-1.82675	-0.944157	-0.652518		-2.0543	-1.01584	-0.671196	-1.96623	-1.06092	-0.749603
291	1.00846	0.815997	1.29636		-1.005	-0.798676	-1.27743		-1.10039	-0.830808	-1.38533	-1.11116	-0.866285	-1.4007
292	0.334238	0.387623	1.27881		-0.671618	-0.805469	-2.20505		-0.684876	-0.790189	-2.34643	-0.720038	-0.870895	-2.22509
293	0.665455	1.24586	0.567632		-0.897746	-1.59999	-0.748663		-0.922874	-1.76081	-0.771766	-0.978846	-1.67537	-0.820826
294	1.16227	0.286282	0.197789		-2.56429	-0.886704	-0.556238		-2.8362	-0.992524	-0.561825	-2.70413	-1.05718	-0.655424
295	1.16954	0.921869	0.134648		-2.48739	-2.19879	-0.246039		-2.61266	-2.29883	-0.225969	-2.47438	-2.24371	-0.273837
296	1.09686	0.295438	0.354908		-2.15332	-0.663051	-0.829136		-2.36724	-0.644994	-0.875184	-2.18893	-0.740869	-0.9058
297	0.115206	1.28844	1.03108		-0.202392	-2.69147	-2.43688		-0.163462	-2.87106	-2.61179	-0.234278	-2.67238	-2.42068
298	1.26407	1.14928	0.542855		-1.43189	-1.31997	-0.581439		-1.58393	-1.41942	-0.547928	-1.50314	-1.42993	-0.644353
299	0.386569	0.903796	0.520139		-0.69376	-1.60162	-0.97351		-0.715108	-1.73532	-1.01354	-0.759307	-1.71621	-1.07697
300	0.588965	1.17679	0.915107		-0.683184	-1.3943	-1.11005		-0.700715	-1.62768	-1.29927	-0.790446	-1.62517	-1.31923
301	1.34902	0.993951	0.859932		-1.29279	-0.963371	-0.822799		-1.46923	-1.06695	-0.879961	-1.43077	-1.09177	-0.92998
302	1.45286	1.16625	0.356177		-1.86134	-1.58627	-0.41585		-1.99884	-1.6998	-0.36116	-1.8824	-1.62558	-0.471861
303	0.942061	1.23329	0.244848		-1.7019	-2.04182	-0.366574		-1.80258	-2.1656	-0.331017	-1.84465	-2.16055	-0.398849
304	1.26963	1.22728	0.771359		-1.21918	-1.18143	-0.720169		-1.31081	-1.26614	-0.727748	-1.28641	-1.24157	-0.777845
305	0.459775	0.342662	1.1812		-0.905286	-0.63645	-2.01519		-0.942592	-0.633669	-2.22548	-0.999948	-0.706259	-2.07216
306	1.18685	0.347594	0.385041		-2.10249	-0.701715	-0.794499		-2.30072	-0.714465	-0.822852	-2.11934	-0.766659	-0.858446
307	1.52352	0.475032	0.522773		-2.03621	-0.712164	-0.799275		-2.29519	-0.708156	-0.821568	-2.05001	-0.798173	-0.890605
308	1.23275	0.310047	0.501891		-2.08602	-0.564407	-1.00719		-2.28327	-0.549424	-1.07683	-2.13958	-0.623152	-1.09889
309	0.577403	1.14479	1.29395		-0.602506	-1.27428	-1.41692		-0.571935	-1.3921	-1.54489	-0.66918	-1.33268	-1.47298
310	1.37111	0.41675	1.00315		-1.72967	-0.498564	-1.34908		-1.89489	-0.447619	-1.49398	-1.77569	-0.57008	-1.40506
311	0.681012	1.35887	0.530096		-0.925945	-1.71631	-0.692699		-0.989658	-1.94343	-0.680134	-1.02281	-1.79191	-0.783763
312	1.28391	0.806278	0.414078		-1.7416	-1.18527	-0.551737		-1.90729	-1.20715	-0.553494	-1.82144	-1.33375	-0.594402
313	1.17092	0.44438	1.38058		-1.44274	-0.490375	-1.64362		-1.54302	-0.447212	-1.75429	-1.5224	-0.550308	-1.73316
314	0.269952	1.33048	0.258044		-0.718422	-2.58399	-0.678795		-0.734815	-2.79748	-0.661098	-0.787019	-2.51851	-0.741528
315	1.08331	0.241506	1.25053		-1.8519	-0.342993	-2.03323		-2.00808	-0.296182	-2.17312	-1.88163	-0.387376	-2.05171
316	0.271123	0.203705	1.09589		-0.845395	-0.59023	-2.50978		-0.844661	-0.607973	-2.63312	-0.948904	-0.620939	-2.58764
317	0.403111	1.37309	0.135509		-1.36386	-2.8395	-0.346797		-1.4513	-3.04896	-0.31271	-1.47581	-2.84489	-0.399487
318	1.25662	0.719941	0.654287		-1.49821	-0.885786	-0.795321		-1.68671	-0.930443	-0.815497	-1.5654	-0.978316	-0.876302
319	0.67911	0.500653	1.44024		-0.940576	-0.65812	-1.81283		-0.977152	-0.669287	-2.02498	-1.03152	-0.727244	-1.8793
320	0.341872	1.10962	0.373798		-0.71283	-2.05302	-0.79418		-0.716765	-2.24386	-0.810651	-0.786146	-2.15379	-0.871433
321	0.868952	1.32126	0.383202		-1.28837	-1.79815	-0.503741		-1.38332	-1.97886	-0.467771	-1.41021	-1.90234	-0.570928
322	1.31657	0.438213	0.404546		-2.06096	-0.788551	-0.716044		-2.28224	-0.796958	-0.748808	-2.13408	-0.890201	-0.79357
323	1.34646	0.20935	1.02537		-2.24387	-0.309442	-1.90127		-2.39771	-0.275075	-1.98435	-2.26577	-0.349488	-1.98926
324	0.430312	1.3827	1.26893		-0.465901	-1.64567	-1.53991		-0.417128	-1.78328	-1.66378	-0.524102	-1.67881	-1.58151
325	0.225856	0.246822	1.2957		-0.652568	-0.731247	-2.67175		-0.653274	-0.767088	-2.84299	-0.703047	-0.783106	-2.63464
326	1.33208	0.747249	0.921184		-1.37952	-0.773332	-0.974462		-1.52004	-0.797224	-1.03697	-1.47383	-0.852507	-1.06165
327	0.29986	1.18231	0.315743		-0.703218	-2.29023	-0.749827		-0.715398	-2.50846	-0.797581	-0.782581	-2.37586	-0.847077
328	0.840238	0.224702	1.05804		-1.68701	-0.378311	-1.97752		-1.81843	-0.336184	-2.22694	-1.9342	-0.41993	-2.16531
329	0.583053	1.21376	0.658227		-0.770964	-1.56489	-0.885132		-0.798043	-1.73412	-0.964079	-0.865047	-1.71545	-0.98408
330	1.20698	0.205841	0.288305		-2.577	-0.566342	-0.867105		-2.76999	-0.578989	-0.862503	-2.61277	-0.600364	-0.950901
331	0.725426	1.11953	0.61332		-0.94189	-1.41833	-0.781505		-0.970222	-1.59051	-0.799434	-1.03029	-1.49251	-0.856932
332	0.286245	0.323366	1.13081		-0.677193	-0.787107	-2.25465		-0.681289	-0.850139	-2.48169	-0.750449	-0.86561	-2.29443
333	1.10138	0.248483	0.38942		-2.22133	-0.560815	-0.970348		-2.37266	-0.561498	-1.03365	-2.36181	-0.615507	-1.12378
334	0.474756	1.06939	0.619552		-0.70965	-1.57768	-0.960781		-0.728625	-1.73999	-1.00698	-0.784428	-1.6918	-1.06107
335	0.81494	0.194355	0.949146		-1.79488	-0.358321	-1.98747		-1.95811	-0.321726	-2.15996	-1.88732	-0.401225	-2.07569
336	1.19623	0.254684	0.21441		-2.60284	-0.777535	-0.62502		-2.78613	-0.787158	-0.635254	-2.63837	-0.868569	-0.694606
337	0.327176	0.400156	1.23653		-0.654835	-0.837245	-2.16383		-0.674213	-0.868371	-2.34915	-0.715786	-0.938955	-2.2397
338	1.23767	0.512877	0.794112		-1.57487	-0.648569	-1.06395		-1.72184	-0.679301	-1.20786	-1.78948	-0.736464	-1.23621
339	0.648969	0.502707	1.07966		-0.963368	-0.721751	-1.5354		-1.02218	-0.730914	-1.70548	-1.07049	-0.794752	-1.6379
340	0.169932	1.10791	0.966282		-0.290822	-2.22573	-2.05451		-0.2694	-2.37204	-1.99966	-0.315868	-2.23061	-2.22026
341	0.341945	1.17118	1.31866		-0.416302	-1.64258	-1.79092		-0.390877	-1.75614	-1.89403	-0.452936	-1.69089	-1.85474
342	0.347022	0.977505	1.19162		-0.463715	-1.48146	-1.72553		-0.428433	-1.6144	-1.92201	-0.52261	-1.58617	-1.81304
343	0.153327	0.972743	0.265379		-0.498968	-2.56722	-0.994852		-0.494598	-2.72336	-1.01794	-0.556253	-2.65203	-1.09583
344	1.30196	0.366802	0.40441		-2.14823	-0.698619	-0.786914		-2.33957	-0.698672	-0.784137	-2.17288	-0.759408	-0.867609
345	1.2229	0.337507	0.290505		-2.31045	-0.794889	-0.660374		-2.54754	-0.898434	-0.65502	-2.45091	-0.895424	-0.76908
346	0.298358	0.335449	1.19432		-0.677425	-0.782948	-2.2718		-0.682954	-0.799023	-2.50097	-0.76747	-0.869643	-2.32801
347	0.353846	1.27513	0.387047		-0.699586	-2.16934	-0.780792		-0.680355	-2.33838	-0.807265	-0.753306	-2.21892	-0.850818
348	1.12381	1.15705	0.92318		-1.06333	-1.09418	-0.865802		-1.13541	-1.15902	-0.919284	-1.18059	-1.20223	-0.94088
349	1.33856	1.31883	1.07697		-1.08605	-1.0703	-0.866466		-1.19923	-1.19587	-0.920192	-1.19106	-1.17558	-0.952349
350	0.977718	1.16022	1.28597		-0.859832	-1.03018	-1.13938		-1.03217	-1.09033	-1.0807	-1.06146	-1.09375	-1.12183
351	1.09835	0.514149	0.636763		-1.54832	-0.735668	-0.937593		-1.73933	-0.754888	-0.974794	-1.69232	-0.813956	-1.06531
352	1.04339	0.447936	1.28857		-1.35045	-0.525493	-1.6044		-1.46776	-0.495291	-1.76362	-1.46125	-0.585311	-1.71272
353	1.03202	0.297351	1.29825		-1.62884	-0.398356	-1.91705		-1.75184	-0.34887	-2.06708	-1.72796	-0.445016	-1.9818
354	1.26022	0.51854	0.560246		-1.74463	-0.759418	-0.831101		-1.95835	-0.763857	-0.823402	-1.7801	-0.833137	-0.907745
355	1.1834	0.996282	1.13379		-1.07743	-0.902412	-1.03252		-1.16176	-0.957038	-1.10233	-1.14491	-0.967812	-1.09701
356	0.238951	1.11719	0.227581		-0.724883	-2.53059	-0.681985		-0.748567	-2.70737	-0.67281	-0.784484	-2.55094	-0.735123
357	0.263445	0.231744	1.29502		-0.753844	-0.640565	-2.62568		-0.787854	-0.613948	-2.84158	-0.819991	-0.703107	-2.59868
358	1.03755	1.02466	0.137437		-2.32668	-2.31126	-0.250002		-2.41241	-2.40724	-0.226953	-2.57199	-2.48513	-0.261444
359	0.296341	0.409644	1.25249		-0.602712	-0.896182	-2.22736		-0.604512	-0.896631	-2.44144	-0.657662	-1.02024	-2.27214
360	0.246522	1.03652	1.38928		-0.342108	-1.76983	-2.13953		-0.300384	-1.86795	-2.29089	-0.384565	-1.83977	-2.17161
361	0.922355	0.26053	1.24694		-1.62997	-0.384398	-2.00947		-1.77508	-0.336667	-2.29936	-1.88168	-0.441356	-2.15019
362	0.439822	0.320362	1.20784		-0.906862	-0.618205	-2.10347		-0.910044	-0.628328	-2.26824	-1.0058	-0.659536	-2.17321
363	1.27691	0.727752	1.22474		-1.25426	-0.691388	-1.20733		-1.35172	-0.68951	-1.29667	-1.30855	-0.751258	-1.25934
364	0.389002	0.506803	1.25406		-0.654394	-0.897115	-1.9557		-0.663138	-0.980392	-2.10194	-0.707629	-1.03468	-2.13517
365	0.426823	1.10183	0.464305		-0.747307	-1.80518	-0.825113		-0.761774	-1.98493	-0.874734	-0.825742	-1.88174	-0.901997
366	1.04612	1.23617	0.296237		-1.65525	-1.8648	-0.401501		-1.76222	-2.04991	-0.352156	-1.7275	-1.90554	-0.441378
367	1.20501	0.404176	0.3003		-2.18266	-0.886261	-0.616979		-2.39884	-0.908937	-0.612079	-2.23219	-0.983285	-0.685789
368	0.954344	0.657731	1.3469		-1.05401	-0.696743	-1.4423		-1.14824	-0.704834	-1.59567	-1.20928	-0.781367	-1.61002
369	1.18554	0.485777	1.03903		-1.47243	-0.570637	-1.31661		-1.65434	-0.536237	-1.43642	-1.58531	-0.642539	-1.46017
370	1.21261	0.367195	0.560672		-1.90799	-0.60406	-0.995925		-2.05688	-0.619979	-1.03675	-2.00052	-0.648215	-1.09085
371	0.531454	1.48741	0.47775		-0.809295	-1.99749	-0.712354		-0.819176	-2.23469	-0.71591	-0.887538	-1.99922	-0.783041
372	0.234187	0.276624	1.33063		-0.62522	-0.773035	-2.62418		-0.625985	-0.761022	-2.81237	-0.669343	-0.832551	-2.57825
373	1.30494	0.840142	0.937027		-1.29866	-0.836888	-0.942684		-1.47599	-0.874026	-0.979713	-1.39083	-0.920819	-1.04103
374	0.26814	1.23787	0.255497		-0.725964	-2.51676	-0.6834		-0.757406	-2.75057	-0.698648	-0.790197	-2.50276	-0.763221
375	0.251837	1.37311	0.317862		-0.606135	-2.5493	-0.813719		-0.597028	-2.79885	-0.81538	-0.67078	-2.48305	-0.900287
376	0.358771	0.304652	1.03141		-0.829874	-0.68136	-2.0608		-0.868505	-0.696538	-2.23238	-0.910905	-0.775998	-2.19383
377	0.261253	0.310687	1.02925		-0.659472	-0.816002	-2.22476		-0.661505	-0.854248	-2.44187	-0.725107	-0.927244	-2.25199
378	0.475902	1.25992	0.376211		-0.873389	-2.01222	-0.658922		-0.911674	-2.26174	-0.651142	-0.980652	-2.06282	-0.739442
379	1.01739	0.216412	0.337451		-2.28892	-0.555893	-0.959469		-2.49937	-0.553006	-1.01406	-2.39289	-0.627719	-1.07456
380	0.402954	0.559428	1.41931		-0.623167	-0.923674	-2.02256		-0.599552	-0.947227	-2.21395	-0.669827	-1.01006	-2.04862
381	0.556741	0.423159	1.20826		-0.922367	-0.668584	-1.81919		-0.979921	-0.661026	-2.04955	-1.02227	-0.739289	-1.87498
382	0.949613	0.219978	0.421985		-2.10477	-0.511822	-1.11682		-2.26007	-0.515936	-1.11008	-2.18275	-0.558385	-1.21636
383	0.761936	0.712456	1.1824		-0.900323	-0.835946	-1.37479		-0.922267	-0.858653	-1.53176	-0.985684	-0.915911	-1.45958
384	1.34556	0.258763	0.285134		-2.56653	-0.658235	-0.744421		-2.79464	-0.666111	-0.768788	-2.53835	-0.722366	-0.814124
385	1.3246	0.238082	0.981331		-2.13084	-0.346191	-1.75194		-2.2638	-0.316386	-1.76332	-2.14009	-0.389387	-1.84806
386	0.899491	1.52285	1.12601		-0.779972	-1.32742	-0.997389		-0.811339	-1.52536	-1.08281	-0.876743	-1.42734	-1.10251
387	0.981152	1.48865	0.701337		-1.02014	-1.49053	-0.70011		-1.12713	-1.64578	-0.724593	-1.1318	-1.61079	-0.775166
388	1.39442	0.598809	1.14873		-1.46304	-0.602545	-1.23699		-1.62934	-0.570277	-1.33043	-1.52011	-0.672847	-1.31114
389	1.20735	1.2771	0.673996		-1.23594	-1.29979	-0.659529		-1.37483	-1.40422	-0.647642	-1.31762	-1.40172	-0.737618
390	1.26162	1.11993	1.3621		-1.01798	-0.898589	-1.09835		-1.07481	-0.942118	-1.17639	-1.07788	-0.959087	-1.15451
391	0.376844	1.03226	0.693478		-0.583843	-1.63559	-1.16658		-0.589908	-1.82449	-1.21738	-0.646906	-1.77063	-1.3286
392	0.370778	0.462346	1.14885		-0.673857	-0.876407	-1.93383		-0.688593	-0.863769	-2.11439	-0.728519	-0.953086	-1.97315
393	1.41764	0.609161	0.498414		-1.85061	-0.877529	-0.692733		-2.05617	-0.901789	-0.685337	-1.88503	-0.941914	-0.76652
394	1.32868	0.355898	0.968415		-1.82247	-0.458186	-1.4316		-1.96296	-0.418805	-1.53067	-1.85989	-0.51506	-1.48402
395	1.31301	0.993308	0.72802		-1.35018	-1.04112	-0.740416		-1.49766	-1.06676	-0.747557	-1.41507	-1.14021	-0.793455
396	0.372256	1.01243	0.304791		-0.853635	-2.02098	-0.671532		-0.880306	-2.2014	-0.688952	-0.952036	-2.09564	-0.732235
397	0.540635	1.10717	1.24266		-0.590747	-1.29501	-1.43012		-0.561239	-1.43902	-1.59282	-0.683494	-1.36518	-1.50745
398	0.370018	0.318352	0.952995		-0.839905	-0.702328	-1.93165		-0.896445	-0.757336	-2.14681	-0.977979	-0.801051	-2.16942
399	0.245467	0.265404	1.01698		-0.687851	-0.758085	-2.33091		-0.723354	-0.817302	-2.53011	-0.77917	-0.890396	-2.51288
400	0.841991	1.11702	1.32626		-0.779597	-1.05699	-1.24408		-0.815227	-1.12453	-1.30485	-0.844507	-1.14211	-1.35048
401	0.500305	0.391841	1.15637		-0.898264	-0.673207	-1.86909		-0.899555	-0.696809	-2.06155	-1.02368	-0.735166	-1.96497
402	1.26169	0.948612	0.747494		-1.3195	-1.00746	-0.776508		-1.4763	-1.08685	-0.82477	-1.46663	-1.13637	-0.867474
403	1.07938	0.800722	1.43613		-1.03404	-0.745119	-1.34975		-1.09045	-0.754223	-1.50596	-1.13574	-0.812218	-1.43405
404	0.509075	1.15454	0.395459		-0.905017	-1.85351	-0.672192		-0.947172	-2.02386	-0.682274	-0.995836	-1.94038	-0.73503
405	1.39535	0.440436	0.524432		-1.98152	-0.686242	-0.845696		-2.19653	-0.678665	-0.904984	-2.03348	-0.764648	-0.931063
406	0.987473	0.250027	1.09081		-1.75773	-0.379984	-1.88313		-1.87829	-0.336198	-2.06454	-1.91142	-0.419757	-2.00515
407	1.11289	0.513937	0.727537		-1.50502	-0.692897	-1.02395		-1.65859	-0.709607	-1.05905	-1.63299	-0.744629	-1.16708
408	0.204103	1.2142	1.37256		-0.283028	-2.09594	-2.24873		-0.242629	-2.21346	-2.40763	-0.329094	-2.16287	-2.27012
409	1.08675	0.60734	0.55927		-1.51558	-0.875454	-0.797603		-1.68945	-0.906984	-0.792759	-1.59088	-0.964295	-0.868995
410	1.34111	0.354611	0.803022		-1.89696	-0.491521	-1.26963		-2.02859	-0.470182	-1.3631	-2.00306	-0.5525	-1.38451
411	0.314202	0.385531	1.11008		-0.661932	-0.848038	-2.08712		-0.682445	-0.904742	-2.27216	-0.728955	-0.958226	-2.19779
412	0.627728	0.773232	1.33143		-0.738718	-0.935622	-1.54361		-0.755977	-0.98041	-1.74204	-0.819987	-1.03427	-1.62788
413	1.22653	0.825176	0.653272		-1.41693	-0.978491	-0.754837		-1.61776	-1.07024	-0.782424	-1.54582	-1.09997	-0.850556
414	1.14101	1.21415	0.607218		-1.2603	-1.33159	-0.637217		-1.33666	-1.42029	-0.642386	-1.34991	-1.42649	-0.689035
415	1.34304	0.406383	0.459796		-2.05488	-0.698335	-0.810598		-2.23202	-0.683126	-0.835952	-2.08622	-0.76698	-0.869432
416	0.295306	0.335445	1.26999		-0.665922	-0.780301	-2.34574		-0.678484	-0.783444	-2.54644	-0.725792	-0.843583	-2.37176
417	1.1433	0.506014	0.43496		-1.79048	-0.860919	-0.721155		-1.96899	-0.954418	-0.730847	-1.92209	-0.981161	-0.793186
418	1.05677	1.22703	1.24663		-0.898232	-1.04898	-1.0656		-0.937314	-1.09755	-1.14904	-0.962201	-1.12822	-1.13197
419	0.57067	0.412381	1.25324		-0.944321	-0.644109	-1.8626		-0.945769	-0.654041	-2.02771	-1.04185	-0.694998	-1.92733
420	1.28547	1.15137	0.987905		-1.13751	-1.02083	-0.868441		-1.18715	-1.07425	-0.908478	-1.23664	-1.11308	-0.925851
421	0.655793	1.05889	1.00814		-0.733445	-1.21452	-1.16019		-0.751787	-1.39348	-1.27127	-0.835674	-1.35937	-1.30449
422	1.06426	0.217115	1.26765		-1.92006	-0.319089	-2.14043		-2.1027	-0.268014	-2.2907	-1.93099	-0.373897	-2.13471
423	0.574555	1.13228	1.29408		-0.602848	-1.26788	-1.42345		-0.587177	-1.34834	-1.53455	-0.665206	-1.34055	-1.48996
424	1.26579	0.509385	0.39951		-1.94728	-0.886386	-0.66371		-2.13962	-0.907501	-0.656642	-2.01481	-0.975779	-0.726013
425	0.558971	0.41163	1.04564		-0.963406	-0.677125	-1.6818		-0.999004	-0.683541	-1.87767	-1.06264	-0.740273	-1.76974
426	0.835705	1.30835	0.652712		-0.972726	-1.47247	-0.737489		-0.99615	-1.63977	-0.756149	-1.07436	-1.55702	-0.799228
427	0.354081	0.220835	0.968089		-0.98698	-0.555796	-2.1987		-1.07863	-0.550946	-2.34086	-1.12172	-0.613824	-2.32471
428	1.2912	0.499779	0.428312		-1.93725	-0.841174	-0.699991		-2.18029	-0.855062	-0.696997	-1.96646	-0.934273	-0.779221
429	0.997924	0.361948	0.274391		-2.08313	-0.887169	-0.635		-2.24076	-0.986449	-0.631545	-2.25277	-1.04698	-0.692078
430	0.216224	1.17438	0.908411		-0.346095	-2.10044	-1.77601		-0.329458	-2.17752	-1.86674	-0.373864	-2.26965	-1.93654
431	1.2744	1.20956	1.46068		-0.97473	-0.922615	-1.11703		-1.04974	-0.983315	-1.23188	-1.07576	-1.01354	-1.21537
432	0.713938	1.39003	0.923642		-0.740058	-1.4408	-0.986221		-0.746786	-1.58106	-1.04625	-0.806417	-1.52976	-1.08506
433	0.164879	1.03831	0.826647		-0.30854	-2.21652	-1.92981		-0.292495	-2.35996	-2.00896	-0.33655	-2.35803	-2.1017
434	0.237254	1.27719	0.311922		-0.593894	-2.51629	-0.838466		-0.605804	-2.73012	-0.86207	-0.659727	-2.57013	-0.946341
435	1.09361	0.358249	0.626022		-1.76692	-0.579689	-1.1055		-2.01396	-0.568113	-1.18891	-1.88777	-0.679146	-1.23003
436	0.49122	1.26042	0.533884		-0.748594	-1.79911	-0.825575		-0.765111	-1.96895	-0.873977	-0.82096	-1.87952	-0.903572
437	0.827076	1.19874	0.602826		-1.02143	-1.43681	-0.718454		-1.08834	-1.59749	-0.738591	-1.11729	-1.54167	-0.799219
438	0.844551	0.688886	1.26183		-0.964441	-0.769306	-1.40645		-1.02974	-0.799056	-1.53972	-1.05553	-0.844963	-1.4956
439	0.325319	1.18456	1.30288		-0.402303	-1.69482	-1.81431		-0.360105	-1.82743	-1.96069	-0.455202	-1.74943	-1.83329
440	0.253709	1.36985	1.24228		-0.327542	-2.05778	-1.93421		-0.278068	-2.19664	-2.05433	-0.370756	-2.06159	-1.97394
441	1.16519	0.274903	0.466769		-2.13587	-0.544267	-1.03107		-2.3377	-0.557576	-1.05357	-2.26051	-0.594768	-1.15505
442	1.11992	0.317672	0.401415		-2.06987	-0.65258	-0.865627		-2.30585	-0.682279	-0.880277	-2.14759	-0.728822	-0.976435
443	0.456187	1.14803	1.06093		-0.548417	-1.47617	-1.38214		-0.506617	-1.60504	-1.49866	-0.615585	-1.53238	-1.43814
444	1.25329	1.0332	1.05502		-1.13217	-0.932004	-0.952785		-1.18942	-0.990071	-1.01623	-1.21874	-1.00128	-1.02642
445	1.26384	0.295167	1.50325		-1.80748	-0.350856	-2.02659		-1.97847	-0.296368	-2.16495	-1.83692	-0.402156	-2.04938
446	0.949332	0.531424	1.20387		-1.18643	-0.624038	-1.46109		-1.36194	-0.612775	-1.67074	-1.37592	-0.730771	-1.67479
447	1.16022	0.353471	0.416218		-2.0265	-0.685312	-0.834209		-2.26905	-0.674071	-0.898333	-2.13716	-0.775422	-0.937348
448	1.48996	0.539728	0.469643		-2.00133	-0.825026	-0.698291		-2.22466	-0.844272	-0.702874	-2.07948	-0.955365	-0.77017
449	0.427959	1.51993	1.04817		-0.484352	-1.8035	-1.34841		-0.434452	-1.96254	-1.44445	-0.544378	-1.83386	-1.39892
450	1.42559	1.17124	0.556946		-1.52294	-1.29022	-0.565721		-1.65324	-1.37757	-0.533839	-1.59428	-1.38287	-0.626321
451	1.01268	0.209115	0.458099		-2.17919	-0.469083	-1.20201		-2.38267	-0.464169	-1.31124	-2.42152	-0.516926	-1.42704
452	1.09934	0.220457	0.262711		-2.48269	-0.634089	-0.790525		-2.64801	-0.665848	-0.744876	-2.49427	-0.672394	-0.865223
453	1.39002	0.375433	0.512784		-2.08586	-0.621936	-0.906237		-2.2737	-0.614858	-0.94943	-2.14328	-0.692777	-0.990951
454	1.10009	0.517726	0.41598		-1.76405	-0.900663	-0.697821		-1.95684	-0.944661	-0.693681	-1.86347	-1.02376	-0.769964
455	1.13794	1.00932	1.28121		-1.00542	-0.885951	-1.13033		-1.07896	-0.932999	-1.19194	-1.08478	-0.958377	-1.22201
456	0.752871	0.61068	1.5614		-0.900687	-0.706246	-1.73287		-0.967092	-0.714098	-1.9683	-0.989019	-0.793367	-1.7811
457	0.334132	0.352705	1.19274		-0.713911	-0.762895	-2.17806		-0.706897	-0.766546	-2.36416	-0.771458	-0.834756	-2.21441
458	1.25912	0.853951	1.0799		-1.20708	-0.810097	-1.04142		-1.32082	-0.846961	-1.1254	-1.32545	-0.889696	-1.15457
459	0.641499	1.29604	0.834032		-0.731198	-1.47358	-0.981249		-0.756486	-1.62626	-1.02161	-0.78628	-1.56783	-1.07326
460	0.247383	0.226006	1.19303		-0.739358	-0.659497	-2.58558		-0.784536	-0.663488	-2.82436	-0.853963	-0.75568	-2.63077
461	1.40522	0.843691	0.61926		-1.56644	-0.987757	-0.695476		-1.79741	-1.0923	-0.693766	-1.70965	-1.12237	-0.798959
462	0.596474	1.12777	0.766714		-0.747975	-1.41628	-0.988639		-0.764876	-1.52243	-1.07826	-0.810672	-1.54663	-1.09678
463	0.37235	1.19728	1.02953		-0.476595	-1.66436	-1.47918		-0.432819	-1.83916	-1.61945	-0.540255	-1.71421	-1.53226
464	1.17181	1.04583	0.221601		-2.04387	-1.89993	-0.334374		-2.19312	-2.02158	-0.293447	-2.09879	-1.95744	-0.375148
465	0.419672	1.28014	1.12818		-0.48961	-1.61979	-1.46556		-0.476173	-1.74518	-1.51346	-0.524874	-1.67287	-1.55663
466	1.05237	0.512977	0.833531		-1.40241	-0.666386	-1.13727		-1.58892	-0.661708	-1.202	-1.48772	-0.738063	-1.25284
467	1.24026	0.320264	0.387594		-2.1965	-0.655577	-0.828006		-2.43643	-0.668848	-0.8233	-2.26139	-0.726144	-0.943474
468	0.286519	0.242729	1.28595		-0.77908	-0.631902	-2.5516		-0.785395	-0.651268	-2.7054	-0.858248	-0.681777	-2.586
469	0.304553	0.228983	1.1307		-0.85418	-0.598624	-2.41769		-0.915474	-0.616538	-2.58135	-0.998022	-0.660032	-2.46184
470	0.115386	1.27946	0.93338		-0.211769	-2.70012	-2.33519		-0.184538	-2.79018	-2.48091	-0.248806	-2.70638	-2.30048
471	0.998382	1.257	0.52899		-1.21877	-1.48744	-0.602521		-1.35258	-1.66655	-0.596322	-1.31478	-1.58608	-0.7167
472	1.29754	0.573869	0.747959		-1.58196	-0.709426	-0.959126		-1.78383	-0.716422	-1.02062	-1.68001	-0.789972	-1.0711
473	1.11612	1.30022	0.831356		-1.06754	-1.23396	-0.777937		-1.15716	-1.33457	-0.819907	-1.18486	-1.36687	-0.85555
