# Supplementary material for: Analytical solution for residual stress and strain preserved in anisotropic inclusion entrapped in an isotropic host
Source: Copernicus journal article supplement (doi:10.5194/se-12-817-2021), 2021-04-15
Supplement: Supplementary file 2 [file FE_regular.xlsx]

## Sheet: Qtz
Shape		Aspect ratio				Analytical stress				FEM CT			FEM VA
	Lx	Ly	Lz		sxx	syy	szz		sxx	syy	szz	sxx	syy	szz
Ellipsoid	1.19992	1.19992	0.359901		-1.10061	-1.10059	-0.591349		-1.10058	-1.10058	-0.591112	-1.10059	-1.10059	-0.591246
	1.19991	1.1999	0.719909		-1.0514	-1.05139	-0.842974		-1.0515	-1.0515	-0.842305	-1.0515	-1.0515	-0.842329
	1.19988	1.19988	1.07991		-1.01108	-1.01107	-0.971197		-1.01133	-1.01133	-0.970261	-1.01132	-1.01133	-0.970265
	0.571353	0.571352	1.19978		-0.9284	-0.928442	-1.14316		-0.928523	-0.928525	-1.14287	-0.928542	-0.928542	-1.14286
	0.387019	0.387029	1.19984		-0.901384	-0.901483	-1.18242		-0.901541	-0.901542	-1.18221	-0.901582	-0.901586	-1.18222
	0.292588	0.292591	1.19991		-0.887265	-0.887397	-1.2003		-0.887492	-0.887487	-1.20013	-0.887552	-0.887548	-1.20015
	0.235287	0.235286	1.19949		-0.878956	-0.879122	-1.20999		-0.879253	-0.879241	-1.20989	-0.879332	-0.879312	-1.20992
Cylinder	1.30818	1.30808	0.45348		-1.09285	-1.09281	-0.644155		-1.13815	-1.14086	-0.509939	-1.07403	-1.07414	-0.677478
	1.29942	1.29881	0.902363		-1.03756	-1.03742	-0.892106		-1.07368	-1.0749	-0.832603	-1.02604	-1.02607	-0.882954
	1.30024	1.30038	1.35575		-0.995591	-0.995621	-1.01083		-1.00997	-1.00912	-1.00577	-0.992739	-0.99301	-0.980748
	0.61879	0.618211	1.50692		-0.917295	-0.916884	-1.16047		-0.897716	-0.897332	-1.20497	-0.928599	-0.928224	-1.11925
	0.41909	0.419485	1.50637		-0.893207	-0.893775	-1.1927		-0.875321	-0.875572	-1.22556	-0.907476	-0.908543	-1.15565
	0.316738	0.316873	1.50241		-0.881394	-0.88174	-1.2071		-0.867056	-0.866802	-1.22954	-0.896036	-0.895742	-1.17407
	0.255094	0.254421	1.50244		-0.875251	-0.873966	-1.21493		-0.862973	-0.862693	-1.23152	-0.891307	-0.890033	-1.18708
Tetrahedron	0.619018	0.623335	0.131555		-1.114	-1.11459	-0.47059		-1.10532	-1.10741	-0.565671	-1.09556	-1.09637	-0.446679
	0.627279	0.628046	0.265111		-1.07998	-1.08019	-0.716924		-1.08078	-1.0805	-0.746044	-1.03814	-1.03855	-0.695852
	0.633004	0.626401	0.40175		-1.047	-1.04435	-0.863923		-1.04966	-1.05021	-0.863479	-0.993803	-0.994043	-0.831706
	0.297681	0.299312	0.445351		-0.957748	-0.960105	-1.08996		-0.936134	-0.935	-1.11067	-0.911769	-0.910319	-1.02947
	0.203459	0.202249	0.445117		-0.926205	-0.923564	-1.14869		-0.887153	-0.886656	-1.17455	-0.882986	-0.882356	-1.08547
	0.15318	0.155082	0.445287		-0.902381	-0.908816	-1.17678		-0.863182	-0.860746	-1.19747	-0.866408	-0.866402	-1.11532
	0.123413	0.124297	0.445785		-0.891307	-0.895347	-1.1929		-0.850073	-0.84766	-1.20802	-0.855868	-0.855028	-1.13492
Cuboid	1.4714	1.4795	0.442		-1.10032	-1.10099	-0.590933		-1.13809	-1.13782	-0.472806	-1.07162	-1.07243	-0.648776
	1.47617	1.47965	0.888433		-1.05094	-1.05149	-0.843649		-1.08408	-1.08243	-0.778048	-1.02269	-1.024	-0.852233
	1.47963	1.47728	1.32967		-1.01141	-1.01089	-0.970991		-1.01976	-1.01432	-0.961096	-0.988303	-0.987875	-0.954558
	0.7025	0.703643	1.47654		-0.928024	-0.928809	-1.14317		-0.894833	-0.888972	-1.18929	-0.917428	-0.917404	-1.10235
	0.476909	0.474023	1.47786		-0.902793	-0.899781	-1.18261		-0.866413	-0.860777	-1.21752	-0.893513	-0.892981	-1.142
	0.358231	0.358204	1.47753		-0.887061	-0.887121	-1.20059		-0.856285	-0.848735	-1.2241	-0.880461	-0.879012	-1.16245
	0.291711	0.290678	1.47713		-0.880103	-0.878321	-1.2098		-0.851068	-0.843086	-1.2258	-0.871933	-0.87069	-1.17504
Hex prism	1.18308	1.18704	0.450339		-1.08695	-1.08747	-0.677995		-1.13243	-1.13233	-0.555435	-1.06538	-1.06529	-0.706153
	1.18322	1.17994	0.897639		-1.02896	-1.02815	-0.920691		-1.0548	-1.05425	-0.875715	-1.01465	-1.01402	-0.906119
	1.18602	1.18782	1.35339		-0.98594	-0.986492	-1.03292		-0.983275	-0.983656	-1.04214	-0.979686	-0.980128	-0.999965
	0.563866	0.561089	1.49568		-0.912208	-0.909827	-1.16925		-0.880449	-0.879297	-1.20987	-0.917736	-0.916845	-1.12765
	0.381542	0.38281	1.49747		-0.88844	-0.890272	-1.19784		-0.860602	-0.860971	-1.22466	-0.89736	-0.897739	-1.16064
	0.288819	0.288282	1.49671		-0.878912	-0.878039	-1.21063		-0.853627	-0.854055	-1.22748	-0.886616	-0.887041	-1.17788
	0.232348	0.228626	1.49756		-0.876415	-0.867724	-1.21765		-0.850726	-0.850438	-1.22852	-0.880213	-0.88001	-1.18853
Octahedron	1.15143	1.14835	0.243884		-1.11436	-1.1141	-0.471242		-1.06393	-1.06167	-0.629371	-1.11268	-1.11214	-0.422582
	1.14912	1.14871	0.487245		-1.07982	-1.07974	-0.718471		-1.02691	-1.02459	-0.803183	-1.07557	-1.0752	-0.670734
	1.15163	1.14758	0.731996		-1.04631	-1.04541	-0.863255		-1.0039	-0.99998	-0.893221	-1.03712	-1.03576	-0.829751
	0.547941	0.549311	0.81623		-0.958691	-0.959761	-1.08939		-0.951683	-0.94805	-1.03775	-0.937461	-0.93703	-1.08188
	0.371777	0.370366	0.813508		-0.925844	-0.924136	-1.14853		-0.930593	-0.923618	-1.08549	-0.903003	-0.900083	-1.14321
	0.280424	0.281254	0.813863		-0.904656	-0.906262	-1.17699		-0.913038	-0.911578	-1.11312	-0.882076	-0.88236	-1.17182
	0.22571	0.226301	0.816282		-0.892439	-0.893965	-1.19306		-0.902994	-0.900234	-1.13243	-0.870619	-0.870389	-1.18777
Isocahedron	1.1828	1.18028	0.354827		-1.10069	-1.10039	-0.591796		-1.08591	-1.12058	-0.583669	-1.09676	-1.09896	-0.585064
	1.18679	1.18417	0.711701		-1.05161	-1.05106	-0.84319		-1.04286	-1.05367	-0.842703	-1.04783	-1.04793	-0.836323
	1.18499	1.18173	1.06597		-1.01143	-1.01054	-0.971444		-1.00665	-1.0006	-0.970474	-1.00719	-1.00634	-0.965832
	0.565019	0.564662	1.18697		-0.928487	-0.928236	-1.14325		-0.922504	-0.921073	-1.13653	-0.921581	-0.923666	-1.14011
	0.383206	0.383614	1.18616		-0.901242	-0.901867	-1.18225		-0.888033	-0.902099	-1.17511	-0.892931	-0.897618	-1.17984
	0.287841	0.288739	1.18291		-0.886421	-0.888193	-1.20032		-0.868209	-0.893539	-1.19317	-0.877932	-0.883718	-1.19829
	0.231857	0.232029	1.18395		-0.87871	-0.879282	-1.21004		-0.856318	-0.887832	-1.20276	-0.8696	-0.875508	-1.20813

## Sheet: Zrc
Shape		Aspect ratio				Analytical stress				FEM CT			FEM VA
	Lx	Ly	Lz		sxx	syy	szz		sxx	syy	szz	sxx	syy	szz
Ellipsoid	1.19992	1.19992	0.359901		-1.02439	-1.02436	-0.514874		-1.0243	-1.0243	-0.514597	-1.02438	-1.02439	-0.514773
	1.19991	1.1999	0.719909		-1.03118	-1.03117	-0.80544		-1.03115	-1.03115	-0.804594	-1.03116	-1.03116	-0.80464
	1.19988	1.19988	1.07991		-1.00882	-1.00881	-0.96429		-1.00895	-1.00895	-0.963088	-1.00895	-1.00895	-0.963098
	0.571353	0.571352	1.19978		-0.924245	-0.924288	-1.16799		-0.924394	-0.924395	-1.16769	-0.924433	-0.924432	-1.1677
	0.387019	0.387029	1.19984		-0.88951	-0.889609	-1.20721		-0.889734	-0.889726	-1.20708	-0.88983	-0.889833	-1.20715
	0.292588	0.292591	1.19991		-0.870374	-0.870506	-1.22299		-0.870752	-0.870714	-1.22301	-0.87087	-0.870866	-1.22314
	0.235287	0.235286	1.19949		-0.858828	-0.858994	-1.23079		-0.859347	-0.859403	-1.23103	-0.859508	-0.859491	-1.23118
Cylinder	1.30818	1.30808	0.45348		-1.02957	-1.02954	-0.57254		-1.04417	-1.04598	-0.419736	-1.01839	-1.01827	-0.61465
	1.29942	1.29881	0.902363		-1.02552	-1.02537	-0.86595		-1.0616	-1.06268	-0.800044	-1.00997	-1.00999	-0.858304
	1.30024	1.30038	1.35575		-0.996224	-0.996256	-1.01336		-1.02806	-1.02644	-1.02093	-0.98745	-0.987431	-0.979581
	0.61879	0.618211	1.50692		-0.910226	-0.909806	-1.18593		-0.896286	-0.895696	-1.25269	-0.918745	-0.918365	-1.13888
	0.41909	0.419485	1.50637		-0.878581	-0.879154	-1.21649		-0.85938	-0.85971	-1.25985	-0.893479	-0.894358	-1.17655
	0.316738	0.316873	1.50241		-0.862274	-0.862621	-1.22853		-0.844108	-0.844115	-1.25418	-0.878186	-0.877905	-1.19332
	0.255094	0.254421	1.50244		-0.853311	-0.852021	-1.2345		-0.837339	-0.836948	-1.25217	-0.874954	-0.873034	-1.21025
Tetrahedron	0.619018	0.623335	0.131555		-1.00739	-1.00799	-0.390405		-0.997855	-0.987492	-0.488247	-0.990034	-0.990676	-0.378419
	0.627279	0.628046	0.265111		-1.03379	-1.03401	-0.655083		-1.00846	-0.9857	-0.668536	-0.994519	-0.997024	-0.646032
	0.633004	0.626401	0.40175		-1.03048	-1.02773	-0.831144		-1.00721	-0.975193	-0.791962	-0.974305	-0.979004	-0.803533
	0.297681	0.299312	0.445351		-0.958706	-0.961138	-1.10857		-0.964179	-0.905986	-1.08879	-0.906048	-0.916857	-1.02702
	0.203459	0.202249	0.445117		-0.921222	-0.91852	-1.17382		-0.921841	-0.857806	-1.18319	-0.876697	-0.889426	-1.08552
	0.15318	0.155082	0.445287		-0.891809	-0.898346	-1.20191		-0.89269	-0.827086	-1.21758	-0.858322	-0.87376	-1.11568
	0.123413	0.124297	0.445785		-0.876601	-0.880685	-1.21666		-0.871981	-0.803245	-1.22525	-0.846789	-0.861867	-1.13523
Cuboid	1.4714	1.4795	0.442		-1.02398	-1.02467	-0.514428		-1.06762	-1.06765	-0.38288	-1.00383	-1.00391	-0.574242
	1.47617	1.47965	0.888433		-1.03083	-1.0314	-0.806265		-1.14351	-1.14452	-0.763297	-1.00166	-1.00216	-0.810313
	1.47963	1.47728	1.32967		-1.00914	-1.0086	-0.964033		-1.13956	-1.13857	-1.02469	-0.98437	-0.983991	-0.938216
	0.7025	0.703643	1.47654		-0.923859	-0.924663	-1.168		-1.02706	-1.0274	-1.35061	-0.921525	-0.921763	-1.11808
	0.476909	0.474023	1.47786		-0.890891	-0.887835	-1.20738		-0.985063	-0.985437	-1.37354	-0.894909	-0.895093	-1.16111
	0.358231	0.358204	1.47753		-0.870078	-0.870139	-1.22323		-0.968364	-0.966423	-1.37248	-0.879754	-0.879309	-1.18208
	0.291711	0.290678	1.47713		-0.860049	-0.858258	-1.23064		-0.956126	-0.954087	-1.36572	-0.869889	-0.869544	-1.19471
Hex prism	1.18308	1.18704	0.450339		-1.03175	-1.03229	-0.610494		-1.04112	-1.06136	-0.470804	-1.01406	-1.0157	-0.645674
	1.18322	1.17994	0.897639		-1.02101	-1.02017	-0.901436		-1.0313	-1.07586	-0.849635	-1.0009	-1.00077	-0.884748
	1.18602	1.18782	1.35339		-0.987461	-0.988033	-1.04043		-0.978541	-1.0354	-1.06231	-0.974498	-0.974549	-0.999938
	0.563866	0.561089	1.49568		-0.903394	-0.90097	-1.19465		-0.848409	-0.911234	-1.25176	-0.908023	-0.90539	-1.14448
	0.381542	0.38281	1.49747		-0.872299	-0.874147	-1.22092		-0.815623	-0.880174	-1.2524	-0.883174	-0.881694	-1.17726
	0.288819	0.288282	1.49671		-0.858559	-0.857681	-1.23128		-0.803793	-0.866313	-1.24694	-0.869791	-0.868243	-1.19376
	0.232348	0.228626	1.49756		-0.853406	-0.844699	-1.23644		-0.799769	-0.862059	-1.24524	-0.861729	-0.859465	-1.20393
Octahedron	1.15143	1.14835	0.243884		-1.00793	-1.00766	-0.39105		-1.02097	-1.02023	-0.583701	-0.997054	-0.99682	-0.353578
	1.14912	1.14871	0.487245		-1.034	-1.03391	-0.656874		-1.03894	-1.03895	-0.791626	-1.02277	-1.0227	-0.613373
	1.15163	1.14758	0.731996		-1.02965	-1.02871	-0.830324		-1.04512	-1.04347	-0.910027	-1.01883	-1.01792	-0.797056
	0.547941	0.549311	0.81623		-0.959699	-0.960804	-1.10791		-1.0328	-1.03456	-1.11	-0.946419	-0.94738	-1.09783
	0.371777	0.370366	0.813508		-0.920877	-0.91913	-1.17365		-1.02271	-1.01998	-1.1766	-0.90993	-0.908259	-1.1662
	0.280424	0.281254	0.813863		-0.894084	-0.895714	-1.20212		-1.00576	-1.01071	-1.21113	-0.886116	-0.887556	-1.1962
	0.22571	0.226301	0.816282		-0.877704	-0.879246	-1.21681		-0.997076	-1.00099	-1.23587	-0.87226	-0.873296	-1.21225
Isocahedron	1.1828	1.18028	0.354827		-1.02458	-1.02427	-0.515354		-0.993077	-1.0335	-0.498935	-1.01959	-1.02112	-0.510895
	1.18679	1.18417	0.711701		-1.03144	-1.03087	-0.805704		-1.00523	-1.03209	-0.790346	-1.02643	-1.02583	-0.798716
	1.18499	1.18173	1.06597		-1.00921	-1.00828	-0.964596		-0.989981	-1.00703	-0.944477	-1.00404	-1.0023	-0.957337
	0.565019	0.564662	1.18697		-0.924321	-0.924065	-1.16809		-0.917443	-0.95938	-1.15321	-0.917363	-0.917864	-1.16121
	0.383206	0.383614	1.18616		-0.889403	-0.890037	-1.20706		-0.878039	-0.944048	-1.20465	-0.881357	-0.884117	-1.20033
	0.287841	0.288739	1.18291		-0.869512	-0.871299	-1.22301		-0.85393	-0.93379	-1.22775	-0.861538	-0.865178	-1.21645
	0.231857	0.232029	1.18395		-0.858564	-0.859138	-1.23083		-0.838922	-0.927967	-1.23968	-0.850158	-0.853853	-1.22437

## Sheet: Rut
Shape		Aspect ratio				Analytical stress				FEM CT			FEM VA
	Lx	Ly	Lz		sxx	syy	szz		sxx	syy	szz	sxx	syy	szz
Ellipsoid	1.19992	1.19992	0.359901		-1.27742	-1.27739	-0.463954		-1.27745	-1.27745	-0.463711	-1.27753	-1.27753	-0.463815
	1.19991	1.1999	0.719909		-1.11219	-1.11218	-0.74827		-1.11253	-1.11253	-0.74734	-1.11253	-1.11253	-0.747385
	1.19988	1.19988	1.07991		-1.02161	-1.0216	-0.946446		-1.02213	-1.02213	-0.944833	-1.02213	-1.02214	-0.944845
	0.571353	0.571352	1.19978		-0.877787	-0.877828	-1.36633		-0.877953	-0.877954	-1.36575	-0.877992	-0.877992	-1.36576
	0.387019	0.387029	1.19984		-0.835303	-0.8354	-1.52602		-0.835525	-0.835517	-1.52563	-0.835613	-0.835616	-1.52571
	0.292588	0.292591	1.19991		-0.812942	-0.813071	-1.61834		-0.813327	-0.813279	-1.61803	-0.813415	-0.813411	-1.61819
	0.235287	0.235286	1.19949		-0.799537	-0.799699	-1.67656		-0.800043	-0.800121	-1.67658	-0.800174	-0.800155	-1.67676
Cylinder	1.30818	1.30808	0.45348		-1.24342	-1.24338	-0.516372		-1.32802	-1.32888	-0.371696	-1.2314	-1.23122	-0.57479
	1.29942	1.29881	0.902363		-1.07841	-1.07824	-0.817881		-1.13522	-1.13601	-0.727792	-1.08657	-1.08678	-0.845771
	1.30024	1.30038	1.35575		-0.99169	-0.991725	-1.02131		-1.02435	-1.0224	-0.99439	-1.01409	-1.01392	-1.02048
	0.61879	0.618211	1.50692		-0.860152	-0.859728	-1.43113		-0.837842	-0.837135	-1.51453	-0.890449	-0.890017	-1.37382
	0.41909	0.419485	1.50637		-0.822529	-0.823097	-1.57709		-0.799632	-0.800006	-1.66488	-0.853921	-0.85488	-1.50586
	0.316738	0.316873	1.50241		-0.803557	-0.803899	-1.65845		-0.783287	-0.783331	-1.73779	-0.832635	-0.83234	-1.58137
	0.255094	0.254421	1.50244		-0.792978	-0.791699	-1.70914		-0.775182	-0.774872	-1.78322	-0.825796	-0.823783	-1.64064
Tetrahedron	0.619018	0.623335	0.131555		-1.35417	-1.35527	-0.353664		-1.31398	-1.29526	-0.441552	-1.369	-1.37017	-0.371636
	0.627279	0.628046	0.265111		-1.19596	-1.19627	-0.593971		-1.2017	-1.16664	-0.65112	-1.20348	-1.20749	-0.645995
	0.633004	0.626401	0.40175		-1.09952	-1.09617	-0.777154		-1.12765	-1.08131	-0.815475	-1.10343	-1.11039	-0.838101
	0.297681	0.299312	0.445351		-0.925955	-0.928477	-1.20345		-0.957215	-0.882115	-1.25577	-0.938128	-0.952774	-1.22321
	0.203459	0.202249	0.445117		-0.873578	-0.870852	-1.38624		-0.893852	-0.812806	-1.4458	-0.886022	-0.902917	-1.36947
	0.15318	0.155082	0.445287		-0.838637	-0.84516	-1.50002		-0.86109	-0.778733	-1.55959	-0.85641	-0.876291	-1.4579
	0.123413	0.124297	0.445785		-0.820525	-0.824582	-1.57814		-0.840215	-0.75428	-1.63411	-0.838063	-0.857608	-1.52109
Cuboid	1.4714	1.4795	0.442		-1.27712	-1.27823	-0.463552		-1.42914	-1.42927	-0.331628	-1.2407	-1.24082	-0.539364
	1.47617	1.47965	0.888433		-1.11137	-1.11208	-0.749183		-1.30501	-1.30639	-0.661425	-1.10556	-1.10618	-0.795784
	1.47963	1.47728	1.32967		-1.02206	-1.02145	-0.946077		-1.21211	-1.21092	-0.950991	-1.03299	-1.03256	-0.967943
	0.7025	0.703643	1.47654		-0.877395	-0.878206	-1.36635		-1.02279	-1.0232	-1.54665	-0.910729	-0.910979	-1.33148
	0.476909	0.474023	1.47786		-0.836645	-0.833597	-1.52693		-0.975828	-0.9762	-1.72321	-0.871864	-0.872056	-1.47191
	0.358231	0.358204	1.47753		-0.812593	-0.812651	-1.61998		-0.957929	-0.955856	-1.81128	-0.85066	-0.850203	-1.55567
	0.291711	0.290678	1.47713		-0.800789	-0.799011	-1.6753		-0.943336	-0.940855	-1.85774	-0.836937	-0.836585	-1.61092
Hex prism	1.18308	1.18704	0.450339		-1.22109	-1.22187	-0.551609		-1.28419	-1.31742	-0.417881	-1.20473	-1.20619	-0.607935
	1.18322	1.17994	0.897639		-1.05868	-1.05771	-0.861673		-1.07771	-1.13661	-0.782948	-1.06586	-1.06526	-0.883609
	1.18602	1.18782	1.35339		-0.974148	-0.974762	-1.06709		-0.955055	-1.02619	-1.05881	-0.993138	-0.992823	-1.05975
	0.563866	0.561089	1.49568		-0.851619	-0.849191	-1.46711		-0.784907	-0.860815	-1.55247	-0.8799	-0.876804	-1.40586
	0.381542	0.38281	1.49747		-0.815324	-0.817157	-1.6046		-0.751331	-0.828781	-1.68906	-0.844791	-0.842878	-1.53015
	0.288819	0.288282	1.49671		-0.799133	-0.798262	-1.68064		-0.738532	-0.813518	-1.75468	-0.825898	-0.823947	-1.60258
	0.232348	0.228626	1.49756		-0.792428	-0.783806	-1.7282		-0.733703	-0.808634	-1.79183	-0.814422	-0.81172	-1.65032
Octahedron	1.15143	1.14835	0.243884		-1.35453	-1.35407	-0.35423		-1.31671	-1.31566	-0.525297	-1.38732	-1.38691	-0.331253
	1.14912	1.14871	0.487245		-1.19516	-1.19505	-0.595698		-1.22449	-1.2245	-0.75422	-1.2292	-1.22911	-0.582916
	1.15163	1.14758	0.731996		-1.09888	-1.09774	-0.776217		-1.17584	-1.17371	-0.909268	-1.12689	-1.12577	-0.780129
	0.547941	0.549311	0.81623		-0.927143	-0.928288	-1.20192		-1.08289	-1.08501	-1.24787	-0.940601	-0.941618	-1.24198
	0.371777	0.370366	0.813508		-0.873264	-0.871501	-1.38565		-1.05202	-1.04887	-1.39149	-0.884509	-0.882779	-1.42786
	0.280424	0.281254	0.813863		-0.840866	-0.842492	-1.50094		-1.02232	-1.02803	-1.47979	-0.852342	-0.853823	-1.53919
	0.22571	0.226301	0.816282		-0.82159	-0.823121	-1.57899		-1.0062	-1.01046	-1.54554	-0.834062	-0.835124	-1.61236
Isocahedron	1.1828	1.18028	0.354827		-1.27735	-1.27689	-0.464385		-1.25068	-1.28733	-0.452023	-1.28024	-1.28131	-0.467083
	1.18679	1.18417	0.711701		-1.11239	-1.11168	-0.748563		-1.08685	-1.12465	-0.731153	-1.11586	-1.11445	-0.752551
	1.18499	1.18173	1.06597		-1.02194	-1.0209	-0.946887		-1.00376	-1.04199	-0.927986	-1.02492	-1.02208	-0.951322
	0.565019	0.564662	1.18697		-0.877844	-0.877583	-1.36666		-0.876598	-0.93155	-1.35235	-0.877469	-0.876715	-1.37107
	0.383206	0.383614	1.18616		-0.835227	-0.835856	-1.52526		-0.831759	-0.905049	-1.51725	-0.83319	-0.834665	-1.5289
	0.287841	0.288739	1.18291		-0.812082	-0.813853	-1.6185		-0.80465	-0.890196	-1.61451	-0.809659	-0.812124	-1.62162
	0.231857	0.232029	1.18395		-0.799265	-0.799831	-1.67687		-0.787496	-0.882868	-1.67502	-0.796062	-0.798735	-1.67911

## Sheet: Apt
Shape		Aspect ratio				Analytical stress				FEM CT			FEM VA
	Lx	Ly	Lz		sxx	syy	szz		sxx	syy	szz	sxx	syy	szz
Ellipsoid	1.19992	1.19992	0.359901		-1.09496	-1.09493	-0.545239		-1.09495	-1.09495	-0.54499	-1.09498	-1.09498	-0.545138
	1.19991	1.1999	0.719909		-1.05432	-1.0543	-0.818885		-1.05443	-1.05443	-0.818128	-1.05443	-1.05443	-0.818161
	1.19988	1.19988	1.07991		-1.01231	-1.0123	-0.966332		-1.01259	-1.01259	-0.965243	-1.01259	-1.01259	-0.965249
	0.571353	0.571352	1.19978		-0.915292	-0.91534	-1.16872		-0.915468	-0.915469	-1.16842	-0.915496	-0.915496	-1.16842
	0.387019	0.387029	1.19984		-0.881629	-0.881741	-1.2148		-0.881858	-0.881856	-1.21464	-0.881923	-0.881926	-1.21466
	0.292588	0.292591	1.19991		-0.863733	-0.863882	-1.23565		-0.86405	-0.864058	-1.23555	-0.864158	-0.864154	-1.23562
	0.235287	0.235286	1.19949		-0.853104	-0.85329	-1.2469		-0.853564	-0.85353	-1.24693	-0.853661	-0.853642	-1.24702
Cylinder	1.30818	1.30808	0.45348		-1.0899	-1.08986	-0.600713		-1.10977	-1.11137	-0.454546	-1.0624	-1.06226	-0.630255
	1.29942	1.29881	0.902363		-1.04049	-1.04032	-0.874851		-1.03203	-1.03255	-0.768675	-1.01596	-1.01589	-0.852419
	1.30024	1.30038	1.35575		-0.995026	-0.995063	-1.0127		-0.973908	-0.973082	-0.936669	-0.98087	-0.980921	-0.964262
	0.61879	0.618211	1.50692		-0.901528	-0.901052	-1.18909		-0.874555	-0.874084	-1.20331	-0.909471	-0.90907	-1.13187
	0.41909	0.419485	1.50637		-0.871318	-0.871965	-1.22681		-0.849175	-0.849427	-1.25231	-0.885263	-0.886241	-1.17761
	0.316738	0.316873	1.50241		-0.856244	-0.856635	-1.24355		-0.838536	-0.838299	-1.26566	-0.871401	-0.871073	-1.20034
	0.255094	0.254421	1.50244		-0.84822	-0.846769	-1.25261		-0.832875	-0.832642	-1.27113	-0.867392	-0.865239	-1.2184
Tetrahedron	0.619018	0.623335	0.131555		-1.10086	-1.10168	-0.422528		-1.07652	-1.07868	-0.538156	-1.06798	-1.06884	-0.395771
	0.627279	0.628046	0.265111		-1.08005	-1.08032	-0.678911		-1.03686	-1.03708	-0.713616	-1.02116	-1.02222	-0.642275
	0.633004	0.626401	0.40175		-1.05035	-1.04701	-0.842659		-0.996833	-0.997473	-0.821569	-0.981186	-0.981491	-0.790232
	0.297681	0.299312	0.445351		-0.95093	-0.953723	-1.10593		-0.893032	-0.891938	-1.05687	-0.897364	-0.896371	-1.02007
	0.203459	0.202249	0.445117		-0.912488	-0.90942	-1.17523		-0.851298	-0.851027	-1.14494	-0.866482	-0.865229	-1.08618
	0.15318	0.155082	0.445287		-0.883233	-0.890621	-1.20821		-0.829501	-0.82716	-1.19144	-0.847438	-0.847991	-1.12129
	0.123413	0.124297	0.445785		-0.869132	-0.873737	-1.22704		-0.815331	-0.812413	-1.2164	-0.835681	-0.835034	-1.14432
Cuboid	1.4714	1.4795	0.442		-1.09453	-1.09543	-0.544806		-1.10994	-1.1099	-0.418371	-1.05789	-1.05798	-0.598775
	1.47617	1.47965	0.888433		-1.05379	-1.05449	-0.819649		-1.03982	-1.04078	-0.712761	-1.01139	-1.01201	-0.815441
	1.47963	1.47728	1.32967		-1.01271	-1.01207	-0.966091		-0.978274	-0.977539	-0.889076	-0.975554	-0.975106	-0.930477
	0.7025	0.703643	1.47654		-0.914854	-0.915768	-1.16872		-0.868066	-0.868158	-1.17173	-0.898408	-0.898688	-1.10599
	0.476909	0.474023	1.47786		-0.883227	-0.879775	-1.21503		-0.837585	-0.838001	-1.23203	-0.871062	-0.871253	-1.15484
	0.358231	0.358204	1.47753		-0.863467	-0.863535	-1.23599		-0.825107	-0.823543	-1.25079	-0.855799	-0.855311	-1.18002
	0.291711	0.290678	1.47713		-0.854427	-0.852411	-1.24667		-0.818042	-0.816388	-1.25684	-0.84597	-0.845591	-1.19558
Hex prism	1.18308	1.18704	0.450339		-1.08545	-1.08613	-0.636828		-1.10068	-1.10086	-0.499203	-1.05292	-1.05325	-0.659431
	1.18322	1.17994	0.897639		-1.03163	-1.03063	-0.907731		-1.01523	-1.01485	-0.806112	-1.00301	-1.00273	-0.87725
	1.18602	1.18782	1.35339		-0.983996	-0.98466	-1.03866		-0.954651	-0.95531	-0.974765	-0.966026	-0.966869	-0.985419
	0.563866	0.561089	1.49568		-0.895088	-0.892345	-1.19939		-0.862493	-0.861177	-1.21593	-0.89722	-0.896207	-1.14055
	0.381542	0.38281	1.49747		-0.865346	-0.867429	-1.23279		-0.839371	-0.839745	-1.25473	-0.873558	-0.874101	-1.18174
	0.288819	0.288282	1.49671		-0.852967	-0.851979	-1.24764		-0.830008	-0.830482	-1.26459	-0.861028	-0.861565	-1.20335
	0.232348	0.228626	1.49756		-0.849118	-0.839322	-1.25575		-0.825852	-0.825691	-1.26758	-0.853468	-0.853273	-1.21671
Octahedron	1.15143	1.14835	0.243884		-1.10144	-1.10107	-0.423176		-1.06797	-1.06728	-0.615606	-1.09403	-1.09373	-0.381681
	1.14912	1.14871	0.487245		-1.07999	-1.07989	-0.680595		-1.0421	-1.04208	-0.810702	-1.06765	-1.06757	-0.634119
	1.15163	1.14758	0.731996		-1.04943	-1.0483	-0.8419		-1.02086	-1.01943	-0.91235	-1.0321	-1.03103	-0.8038
	0.547941	0.549311	0.81623		-0.95205	-0.953318	-1.10526		-0.957102	-0.958534	-1.0686	-0.925689	-0.926765	-1.08811
	0.371777	0.370366	0.813508		-0.912077	-0.910093	-1.17504		-0.928453	-0.926152	-1.11778	-0.885744	-0.883895	-1.16057
	0.280424	0.281254	0.813863		-0.885829	-0.887671	-1.20845		-0.905058	-0.909007	-1.14548	-0.860945	-0.86253	-1.19463
	0.22571	0.226301	0.816282		-0.870406	-0.872145	-1.22723		-0.890446	-0.893883	-1.16501	-0.846939	-0.848071	-1.21367
Isocahedron	1.1828	1.18028	0.354827		-1.09511	-1.09471	-0.545703		-1.07955	-1.10867	-0.539293	-1.08807	-1.09145	-0.539282
	1.18679	1.18417	0.711701		-1.0546	-1.05391	-0.81913		-1.04256	-1.05536	-0.810292	-1.04744	-1.04811	-0.809883
	1.18499	1.18173	1.06597		-1.01275	-1.01166	-0.966619		-1.00347	-1.00944	-0.956592	-1.00582	-1.00458	-0.957408
	0.565019	0.564662	1.18697		-0.915389	-0.915097	-1.16883		-0.903312	-0.923628	-1.15902	-0.907095	-0.908689	-1.16151
	0.383206	0.383614	1.18616		-0.881479	-0.882194	-1.21462		-0.864356	-0.897972	-1.20552	-0.872279	-0.876841	-1.20834
	0.287841	0.288739	1.18291		-0.86277	-0.864784	-1.23568		-0.842108	-0.885082	-1.2271	-0.853808	-0.859584	-1.23017
	0.231857	0.232029	1.18395		-0.852819	-0.853465	-1.24696		-0.82878	-0.87646	-1.23865	-0.8434	-0.849364	-1.24188

## Sheet: Dia
Shape		Aspect ratio				Analytical stress				FEM CT			FEM VA
	Lx	Ly	Lz		sxx	syy	szz		sxx	syy	szz	sxx	syy	szz
Ellipsoid	1.19992	1.19992	0.359901		-1.65033	-1.65024	-0.441136		-1.64865	-1.65001	-0.440654	-1.6488	-1.65017	-0.440697
	1.19991	1.1999	0.719909		-1.21496	-1.21492	-0.705787		-1.21443	-1.21533	-0.704431	-1.21443	-1.21533	-0.704483
	1.19988	1.19988	1.07991		-1.03753	-1.03751	-0.930649		-1.03741	-1.03812	-0.928242	-1.03741	-1.03811	-0.928253
	0.571353	0.571352	1.19978		-0.812919	-0.812993	-1.63268		-0.812263	-0.812749	-1.6311	-0.812307	-0.812785	-1.63114
	0.387019	0.387029	1.19984		-0.752402	-0.752568	-2.05063		-0.751899	-0.752325	-2.04904	-0.751968	-0.752404	-2.04924
	0.292588	0.292591	1.19991		-0.71882	-0.719032	-2.36189		-0.718495	-0.718913	-2.36007	-0.718605	-0.719002	-2.36048
	0.235287	0.235286	1.19949		-0.697141	-0.6974	-2.59558		-0.697003	-0.697376	-2.59443	-0.697105	-0.697464	-2.59503
Cylinder	1.30818	1.30808	0.45348		-1.54603	-1.54586	-0.486684		-1.74619	-1.74022	-0.387029	-1.59084	-1.59028	-0.561412
	1.29942	1.29881	0.902363		-1.14478	-1.14424	-0.779802		-1.26096	-1.26897	-0.790685	-1.21321	-1.21671	-0.865551
	1.30024	1.30038	1.35575		-0.985983	-0.98607	-1.02883		-1.05322	-1.04498	-1.14957	-1.06978	-1.0683	-1.1064
	0.61879	0.618211	1.50692		-0.788075	-0.787278	-1.78739		-0.765052	-0.764694	-2.0256	-0.849067	-0.848447	-1.77944
	0.41909	0.419485	1.50637		-0.733461	-0.734435	-2.21492		-0.710428	-0.710755	-2.46496	-0.787428	-0.790475	-2.14492
	0.316738	0.316873	1.50241		-0.703812	-0.704373	-2.51924		-0.68266	-0.682727	-2.76731	-0.751684	-0.751381	-2.39801
	0.255094	0.254421	1.50244		-0.685752	-0.683667	-2.74238		-0.66264	-0.663366	-3.00103	-0.737935	-0.733654	-2.61965
Tetrahedron	0.619018	0.623335	0.131555		-1.92041	-1.92917	-0.347311		-2.01523	-2.01142	-0.332463	-2.24324	-2.25349	-0.414438
	0.627279	0.628046	0.265111		-1.41397	-1.41544	-0.556245		-1.63543	-1.62074	-0.591936	-1.72992	-1.73924	-0.712781
	0.633004	0.626401	0.40175		-1.19028	-1.17872	-0.735927		-1.43097	-1.4161	-0.833252	-1.48547	-1.49107	-0.953976
	0.297681	0.299312	0.445351		-0.881706	-0.887197	-1.31005		-1.05807	-1.03663	-1.61102	-1.1408	-1.14389	-1.61376
	0.203459	0.202249	0.445117		-0.807665	-0.802431	-1.67835		-0.935597	-0.917597	-2.01656	-1.04255	-1.04406	-1.95435
	0.15318	0.155082	0.445287		-0.756153	-0.767865	-1.97355		-0.877135	-0.855467	-2.29917	-0.985855	-0.99223	-2.19122
	0.123413	0.124297	0.445785		-0.730077	-0.737073	-2.2185		-0.8402	-0.819828	-2.527	-0.95249	-0.956027	-2.37719
Cuboid	1.4714	1.4795	0.442		-1.64779	-1.65451	-0.44079		-1.8822	-1.88424	-0.360949	-1.69374	-1.69601	-0.533455
	1.47617	1.47965	0.888433		-1.21266	-1.21523	-0.706729		-1.41319	-1.41748	-0.686877	-1.31857	-1.32216	-0.819354
	1.47963	1.47728	1.32967		-1.03864	-1.03695	-0.930186		-1.18708	-1.18514	-1.02543	-1.1569	-1.15637	-1.04594
	0.7025	0.703643	1.47654		-0.812163	-0.813731	-1.63273		-0.859205	-0.859704	-1.91682	-0.924931	-0.926189	-1.69549
	0.476909	0.474023	1.47786		-0.754863	-0.749457	-2.05341		-0.788605	-0.789138	-2.35646	-0.8566	-0.857585	-2.05335
	0.358231	0.358204	1.47753		-0.718279	-0.718369	-2.36804		-0.757106	-0.754322	-2.66704	-0.81916	-0.818835	-2.31259
	0.291711	0.290678	1.47713		-0.699217	-0.696279	-2.59017		-0.735733	-0.732497	-2.89098	-0.794003	-0.793884	-2.50613
Hex prism	1.18308	1.18704	0.450339		-1.48127	-1.48522	-0.517907		-1.66331	-1.67944	-0.435957	-1.53021	-1.53294	-0.598186
	1.18322	1.17994	0.897639		-1.10654	-1.10355	-0.828946		-1.22084	-1.23472	-0.860293	-1.18856	-1.18797	-0.917434
	1.18602	1.18782	1.35339		-0.956921	-0.958424	-1.09335		-1.00793	-1.02531	-1.2347	-1.04365	-1.04583	-1.16947
	0.563866	0.561089	1.49568		-0.776368	-0.771921	-1.88153		-0.756927	-0.76949	-2.13516	-0.846892	-0.844877	-1.86835
	0.381542	0.38281	1.49747		-0.722389	-0.725506	-2.31139		-0.705597	-0.720609	-2.57244	-0.786943	-0.788096	-2.23081
	0.288819	0.288282	1.49671		-0.69644	-0.694998	-2.61328		-0.679446	-0.693701	-2.86702	-0.753406	-0.755063	-2.48303
	0.232348	0.228626	1.49756		-0.684117	-0.670222	-2.83462		-0.663624	-0.676967	-3.0726	-0.732557	-0.732891	-2.66876
Octahedron	1.15143	1.14835	0.243884		-1.92489	-1.92139	-0.347791		-1.8355	-1.83219	-0.347874	-2.14672	-2.1452	-0.337381
	1.14912	1.14871	0.487245		-1.41229	-1.41182	-0.557829		-1.4354	-1.436	-0.57709	-1.58088	-1.58169	-0.575472
	1.15163	1.14758	0.731996		-1.1874	-1.18348	-0.734936		-1.25138	-1.24714	-0.770387	-1.31602	-1.31304	-0.780768
	0.547941	0.549311	0.81623		-0.883943	-0.886436	-1.30738		-0.968342	-0.972043	-1.31479	-0.958385	-0.961377	-1.45038
	0.371777	0.370366	0.813508		-0.806975	-0.803585	-1.67696		-0.886649	-0.882269	-1.61876	-0.868896	-0.865933	-1.86327
	0.280424	0.281254	0.813863		-0.760192	-0.763104	-1.9762		-0.831835	-0.840609	-1.84687	-0.816447	-0.819886	-2.17658
	0.22571	0.226301	0.816282		-0.731944	-0.734578	-2.22138		-0.802014	-0.808796	-2.03215	-0.786176	-0.788695	-2.41811
Isocahedron	1.1828	1.18028	0.354827		-1.65074	-1.648	-0.441506		-1.64219	-1.71465	-0.432575	-1.68192	-1.6964	-0.450239
	1.18679	1.18417	0.711701		-1.21587	-1.21337	-0.706089		-1.23223	-1.24704	-0.709192	-1.24383	-1.24588	-0.722514
	1.18499	1.18173	1.06597		-1.03864	-1.03576	-0.931203		-1.05928	-1.05891	-0.946377	-1.0644	-1.06231	-0.952379
	0.565019	0.564662	1.18697		-0.813079	-0.812566	-1.63343		-0.826266	-0.823738	-1.65008	-0.83236	-0.834647	-1.66769
	0.383206	0.383614	1.18616		-0.752207	-0.753316	-2.04832		-0.760834	-0.768713	-2.04945	-0.769258	-0.775401	-2.08609
	0.287841	0.288739	1.18291		-0.717373	-0.720364	-2.3625		-0.720798	-0.743015	-2.3496	-0.733874	-0.742118	-2.401
	0.231857	0.232029	1.18395		-0.69669	-0.697617	-2.59691		-0.694055	-0.728225	-2.57279	-0.711629	-0.720904	-2.63256
