# Supplementary material for: Analytical solution for residual stress and strain preserved in anisotropic inclusion entrapped in an isotropic host
Source: Copernicus journal article supplement (doi:10.5194/se-12-817-2021), 2021-04-15
Supplement: Supplementary file 2 [file se-12-817-2021-supplement.zip]

Archive with 24 entries (21 files):
- Submit_Code/
- Submit_Code/Calculate_Strain.m
- Submit_Code/Fit_Ellipsoid.m
- Submit_Code/bin/
- Submit_Code/bin/Stiffness_Matrix.m
- Submit_Code/bin/elliptici.m
- Submit_Code/bin/Cube_Root.m
- Submit_Code/bin/Eshelby_Tensor_Order.m
- Submit_Code/bin/Rotation_4nd.m
- Submit_Code/bin/Rotation_1nd.m
- Submit_Code/bin/Eshelby_Tensor.m
- Submit_Code/bin/Calc_S.m
- Submit_Code/bin/Fit_Ellip.m
- Submit_Code/bin/Root_Ellipoid.m
- Submit_Code/bin/Calc_Strain.m
- Submit_Code/bin/Rotation_2nd.m
- Submit_Code/Calculate_Eshelby.m
- Submit_Code/Submit_Code.zip
- Supplement_Summary.pdf
- supplementary materials/
- supplementary materials/FE_random.xlsx
- supplementary materials/Random_3D_Shape.gif
- supplementary materials/FE_regular.xlsx
- se-12-817-2021-supplement-title-page.pdf
