# Supplementary material for: Analytical solution for residual stress and strain preserved in anisotropic inclusion entrapped in an isotropic host
Source: Copernicus journal article supplement (doi:10.5194/se-12-817-2021), 2021-04-15
Supplement: Supplementary file 2 [file se-12-817-2021-supplement.zip › se-12-817-2021-supplement-title-page.pdf]

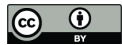

## *Supplement of*

# **Analytical solution for residual stress and strain preserved in anisotropic inclusion entrapped in an isotropic host**

**Xin Zhong et al.**

*Correspondence to:* Xin Zhong (xinzhong0708@gmail.com)

- se-12-817-2021-supplement-title-page.pdf
- Submit\_Code
  - Calculate\_Eshelby.m
  - Calculate\_Strain.m
  - Fit\_Ellipsoid.m
  - Submit\_Code.zip
  - bin
    - \* Calc\_S.m
    - \* Calc\_Strain.m
    - \* Cube\_Root.m
    - \* Eshelby\_Tensor.m
    - \* Eshelby\_Tensor\_Order.m
    - \* Fit\_Ellip.m
    - \* Root\_Ellipsoid.m
    - \* Rotation\_1nd.m
    - \* Rotation\_2nd.m
    - \* Rotation\_4nd.m
    - \* Stiffness\_Matrix.m
    - \* elliptici.m
- Supplement\_Summary.pdf
- supplementary materials
  - FE\_random.xlsx
  - FE\_regular.xlsx
  - Random\_3D\_Shape.gif

The copyright of individual parts of the supplement might differ from the article licence.
