# Supplementary figures and images for: Analytical solution for residual stress and strain preserved in anisotropic inclusion entrapped in an isotropic host
Source: Copernicus journal article supplement (doi:10.5194/se-12-817-2021), 2021-04-15

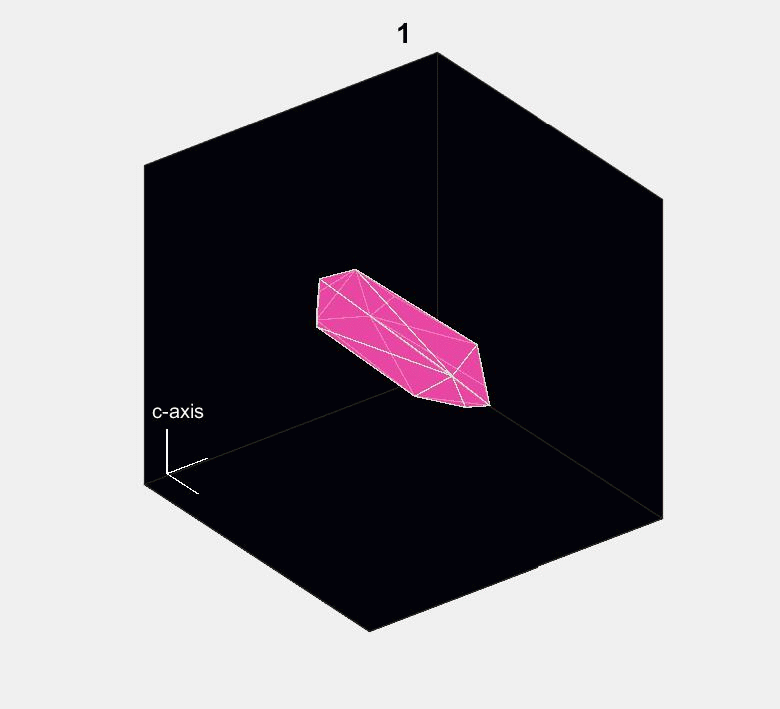

Supplement: Supplementary file 2 [file se-12-817-2021-supplement.zip › supplementary materials/Random_3D_Shape.gif]
